# Supplementary material for: Central Dicer-miR-103/107 controls developmental switch of POMC progenitors into NPY neurons and impacts glucose homeostasis
Source: eLife. 2018 Oct 12;7:e40429. doi: 10.7554/eLife.40429 (PMC6203430; doi:10.7554/eLife.40429)
Supplement: Supplementary file 1. [file elife-40429-supp1.xlsx]

## Sheet: Sheet1
Probeset ID	Sequence	E15 Pomc-Cre; tdTomato; Npy-hrGFP	E15 Npy-hrGFP	E15 Pomc-eGFP	E15 Pomc-Cre; tdTomato; Npy-hrGFP vs E15 Pomc-eGFP
					ratio	fold-change
hp_mmu-let-7a-1_st	TTCACTGTGGGATGAGGTAGTAGGTTGTATAGTTTTAGGGTCACACCCACCACTGGGAGATAACTATACAATCTACTGTCTTTCCTA	2.0941	3.06129	2.92939	0.714859	-1.39888
hp_mmu-let-7a-1_x_st	TTCACTGTGGGATGAGGTAGTAGGTTGTATAGTTTTAGGGTCACACCCACCACTGGGAGATAACTATACAATCTACTGTCTTTCCTA	2.61861	2.78591	2.61861	1	1
hp_mmu-let-7a-2_st	CTGCATGTTCCCAGGTTGAGGTAGTAGGTTGTATAGTTTAGAGTTACATCAAGGGAGATAACTGTACAGCCTCCTAGCTTTCCTTGG	2.71289	2.35202	3.09016	0.877913	-1.13906
hp_mmu-let-7b_st	GCAGGGTGAGGTAGTAGGTTGTGTGGTTTCAGGGCAGTGATGTTGCCCCTCCGAAGATAACTATACAACCTACTGCCTTCCCTGA	2.99881	13.2544	2.56602	1.16866	1.16866
hp_mmu-let-7b_x_st	GCAGGGTGAGGTAGTAGGTTGTGTGGTTTCAGGGCAGTGATGTTGCCCCTCCGAAGATAACTATACAACCTACTGCCTTCCCTGA	4.33932	3.29923	4.41958	0.98184	-1.0185
hp_mmu-let-7c-1_st	TGTGTGCATCCGGGTTGAGGTAGTAGGTTGTATGGTTTAGAGTTACACCCTGGGAGTTAACTGTACAACCTTCTAGCTTTCCTTGGA	2.3651	2.03055	2.38661	0.990988	-1.00909
hp_mmu-let-7c-2_st	ACGGCCTTTGGGGTGAGGTAGTAGGTTGTATGGTTTTGGGCTCTGCCCCGCTCTGCGGTAACTATACAATCTACTGTCTTTCCTGAA	2.02111	2.54693	3.09016	0.654049	-1.52894
hp_mmu-let-7c-2_x_st	ACGGCCTTTGGGGTGAGGTAGTAGGTTGTATGGTTTTGGGCTCTGCCCCGCTCTGCGGTAACTATACAATCTACTGTCTTTCCTGAA	2.06494	2.7224	2.02675	1.01884	1.01884
hp_mmu-let-7d_st	AATGGGTTCCTAGGAAGAGGTAGTAGGTTGCATAGTTTTAGGGCAGAGATTTTGCCCACAAGGAGTTAACTATACGACCTGCTGCCT	2.38034	1.93486	2.39308	0.994677	-1.00535
hp_mmu-let-7e_st	CGCGCCCCCCGGGCTGAGGTAGGAGGTTGTATAGTTGAGGAAGACACCCGAGGAGATCACTATACGGCCTCCTAGCTTTCCCCAGGC	3.03414	2.62783	1.99686	1.51946	1.51946
hp_mmu-let-7f-1_st	ATCAGAGTGAGGTAGTAGATTGTATAGTTGTGGGGTAGTGATTTTACCCTGTTTAGGAGATAACTATACAATCTATTGCCTTCCCTG	2.22319	4.52469	2.17025	1.02439	1.02439
hp_mmu-let-7f-1_x_st	ATCAGAGTGAGGTAGTAGATTGTATAGTTGTGGGGTAGTGATTTTACCCTGTTTAGGAGATAACTATACAATCTATTGCCTTCCCTG	3.11027	3.56603	2.46815	1.26016	1.26016
hp_mmu-let-7f-2_st	TGTGGGATGAGGTAGTAGATTGTATAGTTTTAGGGTCATACCCCATCTTGGAGATAACTATACAGTCTACTGTCTTTCCCACG	3.32474	2.65947	2.33843	1.42178	1.42178
hp_mmu-let-7f-2_x_st	TGTGGGATGAGGTAGTAGATTGTATAGTTTTAGGGTCATACCCCATCTTGGAGATAACTATACAGTCTACTGTCTTTCCCACG	2.75097	2.25957	2.42593	1.13398	1.13398
hp_mmu-let-7g_st	CCAGGCTGAGGTAGTAGTTTGTACAGTTTGAGGGTCTATGATACCACCCGGTACAGGAGATAACTGTACAGGCCACTGCCTTGCCAG	2.58279	2.34909	2.65518	0.972736	-1.02803
hp_mmu-let-7g_x_st	CCAGGCTGAGGTAGTAGTTTGTACAGTTTGAGGGTCTATGATACCACCCGGTACAGGAGATAACTGTACAGGCCACTGCCTTGCCAG	2.28827	2.86719	2.31819	0.987094	-1.01307
hp_mmu-let-7i_st	CTGGCTGAGGTAGTAGTTTGTGCTGTTGGTCGGGTTGTGACATTGCCCGCTGTGGAGATAACTGCGCAAGCTACTGCCTTGCTAG	2.68505	3.11236	1.884	1.42518	1.42518
hp_mmu-mir-1-1_st	GCTTGGGACACATACTTCTTTATATGCCCATATGAACCTGCTAAGCTATGGAATGTAAAGAAGTATGTATTTCAGGC	2.32724	2.53402	2.32759	0.999848	-1.00015
hp_mmu-mir-1-1_x_st	GCTTGGGACACATACTTCTTTATATGCCCATATGAACCTGCTAAGCTATGGAATGTAAAGAAGTATGTATTTCAGGC	2.40866	3.58611	2.73182	0.881706	-1.13416
hp_mmu-mir-1-2_s_st	TCAGAGCACATACTTCTTTATGTACCCATATGAACATTCAGTGCTATGGAATGTAAAGAAGTATGTATTTTG	3.18188	2.73862	2.35399	1.3517	1.3517
hp_mmu-mir-1-2-as_s_st	TTCCTTTAGCTTCTTCTTGGCGGACATTACCTACCCAAAATACATACTTCTTTACATTCCATAGCACTGAATGTTCATATGGGTACA	2.87739	2.27576	2.8968	0.993299	-1.00675
hp_mmu-mir-1-2-as_st	TTCCTTTAGCTTCTTCTTGGCGGACATTACCTACCCAAAATACATACTTCTTTACATTCCATAGCACTGAATGTTCATATGGGTACA	3.66146	2.53099	3.49042	1.049	1.049
hp_mmu-mir-1-2-as_x_st	TTCCTTTAGCTTCTTCTTGGCGGACATTACCTACCCAAAATACATACTTCTTTACATTCCATAGCACTGAATGTTCATATGGGTACA	2.07736	2.80418	2.13535	0.972844	-1.02791
hp_mmu-mir-100_st	CCTGTTGCCACAAACCCGTAGATCCGAACTTGTGCTGATTCTGCACACAAGCTTGTGTCTATAGGTATGTGTCTGTTAGG	2.28992	2.644	2.28992	1	1
hp_mmu-mir-101a_st	AGGCTGCCCTGGCTCAGTTATCACAGTGCTGATGCTGTCCATTCTAAAGGTACAGTACTGTGATAACTGAAGGATGGCAGCCA	2.28827	2.28827	1.94636	1.17567	1.17567
hp_mmu-mir-101a_x_st	AGGCTGCCCTGGCTCAGTTATCACAGTGCTGATGCTGTCCATTCTAAAGGTACAGTACTGTGATAACTGAAGGATGGCAGCCA	2.20199	1.97166	2.08874	1.05422	1.05422
hp_mmu-mir-101b_st	ATCTGAGACTGAACTGCCCTTTTTCGGTTATCATGGTACCGATGCTGTAGCTCTGAAAGGTACAGTACTGTGATAGCTGAAGAATGG	3.64144	2.02397	4.02509	0.904687	-1.10536
hp_mmu-mir-103-1_st	TTCTTACTGCCCTCGGCTTCTTTACAGTGCTGCCTTGTTGCATATGGATCAAGCAGCATTGTACAGGGCTATGAAGGCATTGAGAC	1.73897	1.93275	2.78481	0.624447	-1.60142
hp_mmu-mir-103-1_x_st	TTCTTACTGCCCTCGGCTTCTTTACAGTGCTGCCTTGTTGCATATGGATCAAGCAGCATTGTACAGGGCTATGAAGGCATTGAGAC	2.34395	2.71611	2.93834	0.797712	-1.25359
hp_mmu-mir-103-2_st	GTCTTCGTGCTTTCAGCTTCTTTACAGTGCTGCCTTGTAGCATTCAGGTCAAGCAGCATTGTACAGGGCTATGAAAGAACCAAGAA	2.17287	2.28827	2.37147	0.916254	-1.0914
hp_mmu-mir-103-2_x_st	GTCTTCGTGCTTTCAGCTTCTTTACAGTGCTGCCTTGTAGCATTCAGGTCAAGCAGCATTGTACAGGGCTATGAAAGAACCAAGAA	2.57785	2.28964	2.3037	1.11901	1.11901
hp_mmu-mir-105_st	TGCATTTTAGCCAAGTGCTCAGATGCTTGTGGTGGCTGCTTATGCACCACGAATGCTTGAGCATGTGCTATGGTACCTAC	2.33858	3.22426	2.61311	0.894938	-1.1174
hp_mmu-mir-106a_st	ATGTCAAAGTGCTAACAGTGCAGGTAGCTTTTTGAGTTCTACTGCAGTGCCAGCACTTCTTACAT	1.97453	1.85217	1.93732	1.01921	1.01921
hp_mmu-mir-106a_x_st	ATGTCAAAGTGCTAACAGTGCAGGTAGCTTTTTGAGTTCTACTGCAGTGCCAGCACTTCTTACAT	3.35616	2.65518	2.72365	1.23223	1.23223
hp_mmu-mir-106b_st	CCTGCTGGGACTAAAGTGCTGACAGTGCAGATAGTGGTCCTCTCTGTGCTACCGCACTGTGGGTACTTGCTGCTCCAGCAGG	2.04086	2.05723	2.25582	0.904712	-1.10532
hp_mmu-mir-107_st	TTCTCTGTGCTTTCAGCTTCTTTACAGTGTTGCCTTGTGGCATGGAGTTCAAGCAGCATTGTACAGGGCTATCAAAGCACAGAGAGC	2.65227	2.27431	2.32009	1.14318	1.14318
hp_mmu-mir-107_x_st	TTCTCTGTGCTTTCAGCTTCTTTACAGTGTTGCCTTGTGGCATGGAGTTCAAGCAGCATTGTACAGGGCTATCAAAGCACAGAGAGC	2.44073	2.993	2.27998	1.0705	1.0705
hp_mmu-mir-10a_st	GACCTGTCTGTCTTCTGTATATACCCTGTAGATCCGAATTTGTGTAAGGAATTTTGTGGTCACAAATTCGTATCTAGGGGAATATGT	2.30103	2.41511	2.30979	0.996209	-1.00381
hp_mmu-mir-10b_st	TATATACCCTGTAGAACCGAATTTGTGTGGTACCCACATAGTCACAGATTCGATTCTAGGGGAATATA	2.35034	2.35252	2.42011	0.971173	-1.02968
hp_mmu-mir-10b_x_st	TATATACCCTGTAGAACCGAATTTGTGTGGTACCCACATAGTCACAGATTCGATTCTAGGGGAATATA	2.28827	3.19536	2.84601	0.804029	-1.24374
hp_mmu-mir-1186_st	TCCACCTGTCTCTGCCTCCCGAGTGCTGGAATTAAAGGCATGCACCACCACTGCCCGGCAGGTTCTGTTATTTCTGAGTGTGAGAAA	2.44555	2.18932	2.14419	1.14055	1.14055
hp_mmu-mir-1186_x_st	TCCACCTGTCTCTGCCTCCCGAGTGCTGGAATTAAAGGCATGCACCACCACTGCCCGGCAGGTTCTGTTATTTCTGAGTGTGAGAAA	2.61786	3.37173	3.89793	0.671603	-1.48898
hp_mmu-mir-1186b_st	TGGGATTAAAGGCATGCACCACTTTTTGTTGTAAGGAGCTGTGGTGCCTGACTGTGATCCCAAA	3.36132	3.9449	2.8908	1.16277	1.16277
hp_mmu-mir-1186b_x_st	TGGGATTAAAGGCATGCACCACTTTTTGTTGTAAGGAGCTGTGGTGCCTGACTGTGATCCCAAA	2.02889	1.81882	1.89526	1.07051	1.07051
hp_mmu-mir-1187_st	TCATATAGTATTAAACCGAACTGTTTTCCTTATAGACACAATTTATTTTTACACACACACACACACACATATATATATATATGTGTG	2.94366	2.95449	3.0282	0.972082	-1.02872
hp_mmu-mir-1188_st	ATACTCACAGTCTCCCAGCTGGTGTGAGGTTGGGCCAGGATGAAACCCAAGGCTCTCCGAGGCTCCCCACCACACCCTGCTGCTGAA	3.05311	2.41188	2.13831	1.42782	1.42782
hp_mmu-mir-1190_st	GCTGACACTCTGAGAGTGTTGGTGAGCTCTGGGGCCTTTGCAGACGTGGGAAGGTCTCTGCTGGCCTGATGCTTCCCCCGTCAGCTG	2.33589	2.28827	2.92314	0.799101	-1.25141
hp_mmu-mir-1191_st	TGGAACCAGCCTGGTCTACATAGCAACATCTAAGCCAGCCAGGGCTACATAGTGAGAACCTGCCTCAAAAGCAAAACAGCAGTCTTA	2.43966	2.50018	2.69706	0.904561	-1.10551
hp_mmu-mir-1192_st	CCTTCCAAACAGTAAAAACAAACAAACAAACAGACCAAATTTGTCATTGTTGTTTCGATTTGCTCTTTTTGTTTGTTTGCTTTTGTG	2.74524	2.57626	2.09827	1.30833	1.30833
hp_mmu-mir-1192_x_st	CCTTCCAAACAGTAAAAACAAACAAACAAACAGACCAAATTTGTCATTGTTGTTTCGATTTGCTCTTTTTGTTTGTTTGCTTTTGTG	1.78171	2.25191	2.24526	0.793546	-1.26017
hp_mmu-mir-1193_st	CTGAAGGGACAATGATGCCCACTGTTCTCGGGGTAGCTGTGTGGATGGTAGACCGGTGACGTACACTTCATTTATGCTGTAGGTCAC	1.89591	2.20128	1.93001	0.982333	-1.01798
hp_mmu-mir-1194_st	ACACCTTCTGCTGGAGACAATATAAGGACATTGGAAGAAGGGAGTCTAGCTCTTGCTCCTTTGCCTGCTTGCTGCGTGAGAATGAGT	2.0404	3.2914	1.8145	1.12449	1.12449
hp_mmu-mir-1195_st	TAGAGGCAGGCAGATCTCTGTGAGTTCGAGGCCAGCCTGCTCAACAGAATGAGTTCTAGGGCAGCCAGGAACACACAGAGAAACCCT	2.09047	2.60781	2.56374	0.8154	-1.22639
hp_mmu-mir-1195_x_st	TAGAGGCAGGCAGATCTCTGTGAGTTCGAGGCCAGCCTGCTCAACAGAATGAGTTCTAGGGCAGCCAGGAACACACAGAGAAACCCT	3.31785	3.15194	3.60688	0.919869	-1.08711
hp_mmu-mir-1196_st	TGCTGGTCTTGAACTCACAGAAATCTACCTGCCTCTGCCTTCCAAGTACTGGGCAGTGTGCCACCAAAACCCTACATTTTTGCTGGG	1.97131	3.09996	2.60984	0.755337	-1.32391
hp_mmu-mir-1197_st	GTGAGCTGGAATCAGCCAGCGTTACCTCAAGGTATTTGAAGATGCGGTTGACCATGGTGTGTACGCTTTATTTATGACGTAGGACAC	2.68837	2.79537	2.49158	1.07898	1.07898
hp_mmu-mir-1198_st	TTTTTTTTCTTTTGTTTATTTTGTTTGTGACAGTTGTCTGTTATGTGTTCCTGGCTGGCTTGGTACTCATGTGTAGCCCAAGCTAGC	2.55783	2.08284	2.17629	1.17532	1.17532
hp_mmu-mir-1199_st	AGCCTGCGCCGGAGCCGGGGTCTGAGTCCCGGTCGCGCGGGCGAGGAACTCATTGAGTTGCGCGTGCGGCCGGTGCTCAGTCGGCCC	2.38747	2.29148	2.3376	1.02133	1.02133
hp_mmu-mir-122_st	AGCTGTGGAGTGTGACAATGGTGTTTGTGTCCAAACCATCAAACGCCATTATCACACTAAATAGCT	2.20244	3.57316	2.64546	0.832533	-1.20115
hp_mmu-mir-1224_st	GTGAGGACTGGGGAGGTGGAGGGTAGCATCATTAGAGCCAGAGCTCTGTCTCAGCTCCCTCTCCCCCCACCTCTTCTCTCCTCAG	2.46815	2.29371	1.80212	1.36958	1.36958
hp_mmu-mir-124-1_s_st	AGGCCTCTCTCTCCGTGTTCACAGCGGACCTTGATTTAAATGTCCATACAATTAAGGCACGCGGTGAATGCCAAGAATGGGGCTG	33.3621	51.2567	30.7203	1.086	1.086
hp_mmu-mir-124-1_st	AGGCCTCTCTCTCCGTGTTCACAGCGGACCTTGATTTAAATGTCCATACAATTAAGGCACGCGGTGAATGCCAAGAATGGGGCTG	2.52153	1.77055	3.12772	0.806189	-1.2404
hp_mmu-mir-124-1_x_st	AGGCCTCTCTCTCCGTGTTCACAGCGGACCTTGATTTAAATGTCCATACAATTAAGGCACGCGGTGAATGCCAAGAATGGGGCTG	2.12589	2.88356	2.0238	1.05044	1.05044
hp_mmu-mir-124-2_s_st	ATCAAGATCAGAGACTCTGCTCTCCGTGTTCACAGCGGACCTTGATTTAATGTCATACAATTAAGGCACGCGGTGAATGCCAAGAGC	10.5615	62.3877	30.8646	0.342188	-2.92237
hp_mmu-mir-124-2_st	ATCAAGATCAGAGACTCTGCTCTCCGTGTTCACAGCGGACCTTGATTTAATGTCATACAATTAAGGCACGCGGTGAATGCCAAGAGC	3.13925	2.54924	3.83421	0.818747	-1.22138
hp_mmu-mir-124-2_x_st	ATCAAGATCAGAGACTCTGCTCTCCGTGTTCACAGCGGACCTTGATTTAATGTCATACAATTAAGGCACGCGGTGAATGCCAAGAGC	2.9457	2.24765	1.99786	1.47443	1.47443
hp_mmu-mir-124-3_s_st	CTCTGCGTGTTCACAGCGGACCTTGATTTAATGTCTATACAATTAAGGCACGCGGTGAATGCCAAGAG	34.5437	91.2568	37.5942	0.918856	-1.08831
hp_mmu-mir-125a_st	CTGGGTCCCTGAGACCCTTTAACCTGTGAGGACGTCCAGGGTCACAGGTGAGGTTCTTGGGAGCCTGG	2.40524	3.11733	2.79851	0.85947	-1.16351
hp_mmu-mir-125b-1_st	TGCGCTCCCCTCAGTCCCTGAGACCCTAACTTGTGATGTTTACCGTTTAAATCCACGGGTTAGGCTCTTGGGAGCTG	2.69716	2.44823	2.8493	0.946602	-1.05641
hp_mmu-mir-125b-1_x_st	TGCGCTCCCCTCAGTCCCTGAGACCCTAACTTGTGATGTTTACCGTTTAAATCCACGGGTTAGGCTCTTGGGAGCTG	2.85842	2.3544	2.48222	1.15156	1.15156
hp_mmu-mir-125b-2_st	GCCTAGTCCCTGAGACCCTAACTTGTGAGGTATTTTAGTAACATCACAAGTCAGGTTCTTGGGACCTAGGC	3.35448	1.89809	2.90527	1.15462	1.15462
hp_mmu-mir-125b-2_x_st	GCCTAGTCCCTGAGACCCTAACTTGTGAGGTATTTTAGTAACATCACAAGTCAGGTTCTTGGGACCTAGGC	2.58526	2.67934	2.35399	1.09825	1.09825
hp_mmu-mir-126_st	TGACAGCACATTATTACTTTTGGTACGCGCTGTGACACTTCAAACTCGTACCGTGAGTAATAATGCGCGGTCA	3.30408	2.33283	2.29869	1.43738	1.43738
hp_mmu-mir-127_st	CCAGCCTGCTGAAGCTCAGAGGGCTCTGATTCAGAAAGATCATCGGATCCGTCTGAGCTTGGCTGGTCGG	2.01334	1.93104	2.05386	0.980269	-1.02013
hp_mmu-mir-1274a_st	CCATTCTTCAGGTCCCTGTTCAGGCGCCAAACTGTTGCTGGCCGTCCAGCGGCACGCAAGGAACAGGTACAGCTGAGATGGCA	2.58831	2.12597	3.24653	0.797253	-1.25431
hp_mmu-mir-128-1_st	GTTGGATTCGGGGCCGTAGCACTGTCTGAGAGGTTTACATTTCTCACAGTGAACCGGTCTCTTTTTCAGC	2.31068	2.25906	2.05584	1.12396	1.12396
hp_mmu-mir-128-1_x_st	GTTGGATTCGGGGCCGTAGCACTGTCTGAGAGGTTTACATTTCTCACAGTGAACCGGTCTCTTTTTCAGC	2.24238	2.5851	2.30239	0.973937	-1.02676
hp_mmu-mir-128-2_st	CAGTGGGAAGGGGGGCCGATGCACTGTAAGAGAGTGAGTAGCAGGTCTCACAGTGAACCGGTCTCTTTCCCTACTG	2.77258	2.24257	3.98989	0.694901	-1.43905
hp_mmu-mir-128-2_x_st	CAGTGGGAAGGGGGGCCGATGCACTGTAAGAGAGTGAGTAGCAGGTCTCACAGTGAACCGGTCTCTTTCCCTACTG	2.2164	2.2164	2.43034	0.911971	-1.09653
hp_mmu-mir-129-1_st	TGGATCTTTTTGCGGTCTGGGCTTGCTGTTCTCTCGACAGTAGTCAGGAAGCCCTTACCCCAAAAAGTATCTA	2.94549	2.54227	2.56653	1.14766	1.14766
hp_mmu-mir-129-1_x_st	TGGATCTTTTTGCGGTCTGGGCTTGCTGTTCTCTCGACAGTAGTCAGGAAGCCCTTACCCCAAAAAGTATCTA	2.28691	4.29757	2.53666	0.901544	-1.10921
hp_mmu-mir-129-2_st	TGCCTTTCGCGAATCTTTTTGCGGTCTGGGCTTGCTGTACATAACTCAATAGCCGGAAGCCCTTACCCCAAAAAGCATTCGCGGAGG	3.18188	2.33094	3.4103	0.93302	-1.07179
hp_mmu-mir-129-2_x_st	TGCCTTTCGCGAATCTTTTTGCGGTCTGGGCTTGCTGTACATAACTCAATAGCCGGAAGCCCTTACCCCAAAAAGCATTCGCGGAGG	2.55128	2.20433	2.12464	1.2008	1.2008
hp_mmu-mir-1306_st	GAGGTAATGGACGTTGGCTCTGGTGGTGATGGACAGTCCGAACCTCCTGCCGACGACCCATTCAACTTCTA	2.8809	5.24056	3.00891	0.957457	-1.04443
hp_mmu-mir-130a_st	GAGCTCTTTTCACATTGTGCTACTGTCTAACGTGTACCGAGCAGTGCAATGTTAAAAGGGCATC	2.18091	2.07825	2.61433	0.834214	-1.19873
hp_mmu-mir-130a_x_st	GAGCTCTTTTCACATTGTGCTACTGTCTAACGTGTACCGAGCAGTGCAATGTTAAAAGGGCATC	2.08357	2.22123	2.06715	1.00795	1.00795
hp_mmu-mir-130b_st	GGCTTGTTGGACACTCTTTCCCTGTTGCACTACTGTGGGCCTCTGGGAAGCAGTGCAATGATGAAAGGGCATCTGTCGGGCC	2.35866	2.35866	1.97704	1.19303	1.19303
hp_mmu-mir-132_st	GGGCAACCGTGGCTTTCGATTGTTACTGTGGGAACCGGAGGTAACAGTCTACAGCCATGGTCGCCC	2.89044	2.64041	2.41198	1.19837	1.19837
hp_mmu-mir-133a-1_st	GCTAAAGCTGGTAAAATGGAACCAAATCGCCTCTTCAATGGATTTGGTCCCCTTCAACCAGCTGTAGC	2.14677	2.19679	2.35399	0.911971	-1.09653
hp_mmu-mir-133a-1_x_st	GCTAAAGCTGGTAAAATGGAACCAAATCGCCTCTTCAATGGATTTGGTCCCCTTCAACCAGCTGTAGC	2.62856	2.26641	3.06061	0.858833	-1.16437
hp_mmu-mir-133a-2_st	AGAAGCCAAATGCTTTGCTGAAGCTGGTAAAATGGAACCAAATCAGCTGTTGGATGGATTTGGTCCCCTTCAACCAGCTGTAGCTGC	2.41856	2.11888	2.26899	1.06592	1.06592
hp_mmu-mir-133a-2_x_st	AGAAGCCAAATGCTTTGCTGAAGCTGGTAAAATGGAACCAAATCAGCTGTTGGATGGATTTGGTCCCCTTCAACCAGCTGTAGCTGC	3.4988	2.48832	2.31883	1.50886	1.50886
hp_mmu-mir-133b_st	CCTCCAAAGGGAGTGGCCCCCTGCTCTGGCTGGTCAAACGGAACCAAGTCCGTCTTCCTGAGAGGTTTGGTCCCCTTCAACCAGCTA	2.90954	2.65176	3.00332	0.968773	-1.03223
hp_mmu-mir-134_st	AGGGTGTGTGACTGGTTGACCAGAGGGGCGTGCACTCTGTTCACCCTGTGGGCCACCTAGTCACCAACCCT	2.78591	2.02789	2.14677	1.29772	1.29772
hp_mmu-mir-135a-1_st	AGGCCTCACTGTTCTCTATGGCTTTTTATTCCTATGTGATTCTATTGCTCGCTCATATAGGGATTGGAGCCGTGGCGTACGGTGAGG	2.78591	2.39983	1.98651	1.40241	1.40241
hp_mmu-mir-135a-2_st	AGATAAATTCACTCTAGTGCTTTATGGCTTTTTATTCCTATGTGATCGTAATAAAGTCTCATGTAGGGATGGAAGCCATGAAATACA	4.2685	3.09061	3.15791	1.35169	1.35169
hp_mmu-mir-135b_st	CGCTCTGCTGTGGCCTATGGCTTTTCATTCCTATGTGATTGCTGCTCCGAACTCATGTAGGGCTAAAAGCCATGGGCTACAGTGAGG	2.52342	3.73299	2.38209	1.05933	1.05933
hp_mmu-mir-136_st	GAGGACTCCATTTGTTTTGATGATGGATTCTTAAGCTCCATCATCGTCTCAAATGAGTCTTC	2.57006	1.96103	3.08081	0.834214	-1.19873
hp_mmu-mir-137_st	CTTCGGTGACGGGTATTCTTGGGTGGATAATACGGATTACGTTGTTATTGCTTAAGAATACGCGTAGTCGAGG	3.41489	1.95519	1.93225	1.76731	1.76731
hp_mmu-mir-138-1_st	CTCTAGCATGGTGTTGTGGGACAGCTGGTGTTGTGAATCAGGCCGTTGCCAATCAGAGAACGGCTACTTCACAACACCAGGGCCACA	2.85842	2.61903	2.2683	1.26016	1.26016
hp_mmu-mir-138-1_x_st	CTCTAGCATGGTGTTGTGGGACAGCTGGTGTTGTGAATCAGGCCGTTGCCAATCAGAGAACGGCTACTTCACAACACCAGGGCCACA	2.14677	3.09016	2.98119	0.720105	-1.38869
hp_mmu-mir-138-2_st	CAGCTGGTGTTGTGAATCAGGCCGACGAGCAGCGCATCCTCTTACCCGGCTATTTCACGACACCAGGGTTG	2.2112	2.46135	3.02822	0.730198	-1.36949
hp_mmu-mir-138-2_x_st	CAGCTGGTGTTGTGAATCAGGCCGACGAGCAGCGCATCCTCTTACCCGGCTATTTCACGACACCAGGGTTG	2.10227	2.67	3.02528	0.694901	-1.43905
hp_mmu-mir-139_st	GTGTATTCTACAGTGCACGTGTCTCCAGTGTGGCTCGGAGGCTGGAGACGCGGCCCTGTTGGAGTAAC	2.01633	2.248	2.28935	0.880741	-1.13541
hp_mmu-mir-140_st	CCTGCCAGTGGTTTTACCCTATGGTAGGTTACGTCATGCTGTTCTACCACAGGGTAGAACCACGGACAGG	2.78591	2.44435	2.87948	0.967504	-1.03359
hp_mmu-mir-141_st	GGGTCCATCTTCCAGTGCAGTGTTGGATGGTTGAAGTATGAAGCTCCTAACACTGTCTGGTAAAGATGGCCC	2.6715	2.33906	2.02348	1.32025	1.32025
hp_mmu-mir-141_x_st	GGGTCCATCTTCCAGTGCAGTGTTGGATGGTTGAAGTATGAAGCTCCTAACACTGTCTGGTAAAGATGGCCC	2.44752	2.41312	2.48242	0.985939	-1.01426
hp_mmu-mir-142_st	ACCCATAAAGTAGAAAGCACTACTAACAGCACTGGAGGGTGTAGTGTTTCCTACTTTATGGATG	2.62835	1.88107	2.02536	1.29772	1.29772
hp_mmu-mir-143_st	CCTGAGGTGCAGTGCTGCATCTCTGGTCAGTTGGGAGTCTGAGATGAAGCACTGTAGCTCAGG	2.30287	2.11748	1.95508	1.17789	1.17789
hp_mmu-mir-144_st	GGCTGGGATATCATCATATACTGTAAGTTTGTGATGAGACACTACAGTATAGATGATGTACTAGTC	3.03503	2.49291	2.75065	1.10339	1.10339
hp_mmu-mir-145_st	CTCACGGTCCAGTTTTCCCAGGAATCCCTTGGATGCTAAGATGGGGATTCCTGGAAATACTGTTCTTGAG	2.36693	2.11225	2.06938	1.14379	1.14379
hp_mmu-mir-146a_st	AGCTCTGAGAACTGAATTCCATGGGTTATATCAATGTCAGACCTGTGAAATTCAGTTCTTCAGCT	2.69789	2.67812	2.48461	1.08584	1.08584
hp_mmu-mir-146a_x_st	AGCTCTGAGAACTGAATTCCATGGGTTATATCAATGTCAGACCTGTGAAATTCAGTTCTTCAGCT	1.91864	2.46135	2.41779	0.793551	-1.26016
hp_mmu-mir-146b_st	GACTGAGAGAACTTTGGCCACCTGGCTCTGAGAACTGAATTCCATAGGCTGTGAGCTCTAGCAGACGCCCTAGGGACTCAGTTCTGG	2.42264	2.09113	2.36941	1.02246	1.02246
hp_mmu-mir-147_st	TATGAATCTAGTGGAAACATTTCTGCACAAACTAGATGTTGATGCCAGTGTGCGGAAATGCTTCTGCTACATTTGTAGG	2.09536	2.2338	2.82392	0.742005	-1.3477
hp_mmu-mir-148a_st	AGCCAGTTTGGTCTTTTGAGACAAAGTTCTGAGACACTCCGACTCTGAGTATGATAGAAGTCAGTGCACTACAGAACTTTGTCTCTA	2.47351	1.98103	2.0472	1.20824	1.20824
hp_mmu-mir-148b_st	CAGGCACCCTTAGCATTTGAGGTGAAGTTCTGTTATACACTCAGGCTGTGGCTCTGAAAGTCAGTGCATCACAGAACTTTGTCTCGA	2.46135	1.69263	2.51091	0.980262	-1.02013
hp_mmu-mir-149_st	GGCTCTGGCTCCGTGTCTTCACTCCCGTGTTTGTCCGAGGAGGGAGGGAGGGACGGGGGCGGTGCT	2.3353	3.07833	3.51904	0.66362	-1.50689
hp_mmu-mir-150_st	CCCTGTCTCCCAACCCTTGTACCAGTGCTGTGCCTCAGACCCTGGTACAGGCCTGGGGGATAGGG	2.33514	2.40519	2.19511	1.06379	1.06379
hp_mmu-mir-151_st	CCTGCCCTCGAGGAGCTCACAGTCTAGTATGTCTCCTCCCTACTAGACTGAGGCTCCTTGAGGACAGG	2.17468	2.5299	1.96446	1.10701	1.10701
hp_mmu-mir-151_x_st	CCTGCCCTCGAGGAGCTCACAGTCTAGTATGTCTCCTCCCTACTAGACTGAGGCTCCTTGAGGACAGG	2.02221	2.63964	2.14938	0.940833	-1.06289
hp_mmu-mir-152_st	CCGGGCCTAGGTTCTGTGATACACTCCGACTCGGGCTCTGGAGCAGTCAGTGCATGACAGAACTTGGGCCCGG	2.78591	2.19073	3.08	0.904517	-1.10556
hp_mmu-mir-153_st	CGGTGTCATTTTTGTGACGTTGCAGCTAGTAATATGAGCCCAGTTGCATAGTCACAAAAGTGATCATTG	2.10482	2.92998	2.33469	0.901544	-1.10921
hp_mmu-mir-154_st	GAAGATAGGTTATCCGTGTTGCCTTCGCTTTATTCGTGACGAATCATACACGGTTGACCTATTTTT	2.57785	2.54568	2.32484	1.10883	1.10883
hp_mmu-mir-155_st	CTGTTAATGCTAATTGTGATAGGGGTTTTGGCCTCTGACTGACTCCTACCTGTTAGCATTAACAG	2.14184	3.36422	2.56749	0.834214	-1.19873
hp_mmu-mir-15a_st	CCCTTGGAGTAAAGTAGCAGCACATAATGGTTTGTGGATGTTGAAAAGGTGCAGGCCATACTGTGCTGCCTCAAAATACAAGGA	2.92799	2.2727	2.11791	1.38249	1.38249
hp_mmu-mir-15b_st	CTGTAGCAGCACATCATGGTTTACATACTACAGTCAAGATGCGAATCATTATTTGCTGCTCTAG	2.04635	2.47243	2.67391	0.765301	-1.30667
hp_mmu-mir-16-1_st	ATGTCAGCGGTGCCTTAGCAGCACGTAAATATTGGCGTTAAGATTCTGAAATTACCTCCAGTATTGACTGTGCTGCTGAAGTAAGGT	2.32025	2.00252	2.76711	0.83851	-1.19259
hp_mmu-mir-16-1_x_st	ATGTCAGCGGTGCCTTAGCAGCACGTAAATATTGGCGTTAAGATTCTGAAATTACCTCCAGTATTGACTGTGCTGCTGAAGTAAGGT	2.22046	2.46135	2.79086	0.795619	-1.25688
hp_mmu-mir-16-2_st	CATGCTTGTTCCACTCTAGCAGCACGTAAATATTGGCGTAGTGAAATAAATATTAAACACCAATATTATTGTGCTGCTTTAGTGTGA	2.41613	2.46135	2.35399	1.0264	1.0264
hp_mmu-mir-16-2_x_st	CATGCTTGTTCCACTCTAGCAGCACGTAAATATTGGCGTAGTGAAATAAATATTAAACACCAATATTATTGTGCTGCTTTAGTGTGA	1.96698	3.03949	3.04242	0.646518	-1.54675
hp_mmu-mir-17_st	GTCAGAATAATGTCAAAGTGCTTACAGTGCAGGTAGTGATGTGTGCATCTACTGCAGTGAGGGCACTTGTAGCATTATGCTGAC	2.52174	3.14045	2.53939	0.993051	-1.007
hp_mmu-mir-181a-1_st	GGTTGCTTCAGTGAACATTCAACGCTGTCGGTGAGTTTGGAATTCAAATAAAAACCATCGACCGTTGATTGTACCCTATAGCTAACC	2.87667	2.09111	1.93073	1.48994	1.48994
hp_mmu-mir-181a-1_x_st	GGTTGCTTCAGTGAACATTCAACGCTGTCGGTGAGTTTGGAATTCAAATAAAAACCATCGACCGTTGATTGTACCCTATAGCTAACC	3.27095	2.85815	3.35713	0.974328	-1.02635
hp_mmu-mir-181a-2_st	CCATGGAACATTCAACGCTGTCGGTGAGTTTGGGATTCAAAAACAAAAAAACCACCGACCGTTGACTGTACCTTGG	3.45391	3.1749	3.69133	0.935682	-1.06874
hp_mmu-mir-181a-2_x_st	CCATGGAACATTCAACGCTGTCGGTGAGTTTGGGATTCAAAAACAAAAAAACCACCGACCGTTGACTGTACCTTGG	2.56395	2.25655	2.52389	1.01587	1.01587
hp_mmu-mir-181b-1_st	AGGTCACAATCAACATTCATTGCTGTCGGTGGGTTGAACTGTGTAGAAAAGCTCACTGAACAATGAATGCAACTGTGGCC	1.94705	2.63271	3.50096	0.556147	-1.79809
hp_mmu-mir-181b-1_x_st	AGGTCACAATCAACATTCATTGCTGTCGGTGGGTTGAACTGTGTAGAAAAGCTCACTGAACAATGAATGCAACTGTGGCC	2.75019	2.15781	2.06483	1.33192	1.33192
hp_mmu-mir-181b-2_st	TTGATGGCTGCACTCAACATTCATTGCTGTCGGTGGGTTTGAATGTCAACCAACTCACTGATCAATGAATGCAAACTGCGGGCCAAA	2.96563	2.21977	2.23671	1.32589	1.32589
hp_mmu-mir-181c_st	GCCAAGGGTTTGGGGGAACATTCAACCTGTCGGTGAGTTTGGGCAGCTCAGACAAACCATCGACCGTTGAGTGGACCCCGAGGCCTG	1.8817	2.36105	3.17972	0.591783	-1.68981
hp_mmu-mir-181c_x_st	GCCAAGGGTTTGGGGGAACATTCAACCTGTCGGTGAGTTTGGGCAGCTCAGACAAACCATCGACCGTTGAGTGGACCCCGAGGCCTG	2.54235	2.70309	2.52559	1.00663	1.00663
hp_mmu-mir-181d_st	ACAATTAACATTCATTGTTGTCGGTGGGTTGTGAGGAGGCAGCCAGACCCACCGGGGGATGAATGTCACTGT	2.99812	2.9117	2.54525	1.17793	1.17793
hp_mmu-mir-181d_x_st	ACAATTAACATTCATTGTTGTCGGTGGGTTGTGAGGAGGCAGCCAGACCCACCGGGGGATGAATGTCACTGT	3.18188	3.51726	2.15596	1.47585	1.47585
hp_mmu-mir-182_st	ACCATTTTTGGCAATGGTAGAACTCACACCGGTAAGGTAATGGGACCCGGTGGTTCTAGACTTGCCAACTATGGT	3.78741	2.33317	2.46663	1.53546	1.53546
hp_mmu-mir-183_st	CTGTGTATGGCACTGGTAGAATTCACTGTGAACAGTCTCAGTCAGTGAATTACCGAAGGGCCATAAACAG	2.04021	2.5702	2.25424	0.905057	-1.1049
hp_mmu-mir-1839_st	GAAAAGGTAGATAGAACAGGTCTTGTTTGCAAAATAAATTCAAGACCTACTTATCTACCAACAGCCATTGCCT	2.62451	2.14677	2.67537	0.98099	-1.01938
hp_mmu-mir-184_st	CCTTTCCTTATCACTTTTCCAGCCAGCTTTGTGACTCTAAGTGTTGGACGGAGAACTGATAAGGGTAGG	2.49721	2.52487	2.79254	0.894244	-1.11826
hp_mmu-mir-185_st	AGGGATTGGAGAGAAAGGCAGTTCCTGATGGTCCCCTCCCAGGGGCTGGCTTTCCTCTGGTCCTT	3.11532	3.68596	2.56067	1.2166	1.2166
hp_mmu-mir-186_st	ACTTTCCAAAGAATTCTCCTTTTGGGCTTTCTCATTTTATTTTAAGCCCTAAGGTGAATTTTTTGGGAAGT	7.2083	4.06983	3.24928	2.21843	2.21843
hp_mmu-mir-187_st	TCAGGCTACAACACAGGACCCGGGCGCTGCTCTGACCCCTCGTGTCTTGTGTTGCAGCCGG	2.21725	2.37724	3.54644	0.625204	-1.59948
hp_mmu-mir-188_st	TCTCACATCCCTTGCATGGTGGAGGGTGAGCTCTCTGAAAACCCCTCCCACATGCAGGGTTTGCAGGA	4.73128	3.36582	2.51263	1.883	1.883
hp_mmu-mir-1892_st	TGGATATATTTCTACTCTTGACCAAAGTTTTGTAAGAAACAATACAGAATTTGGGGACGGGAGGGAGGATACTTTGAGAA	2.00689	2.46559	2.65868	0.754844	-1.32478
hp_mmu-mir-1893_st	CCAGAGCGGAGAGGTATCTGCTGCGCCTGAGATGAGTAAACTGTCGTTTCGGGCGCGGGCGCTGGACGCCTCGAAGCCGCTGC	3.54644	2.40469	3.54644	1	1
hp_mmu-mir-1894_st	TCTTTGTTCTCTCTCCCCTACCACCTGCCTCTTCCCTGCTGTGGAGCAGGCAAGGGAGAGGGTGAAGGGAGGGCCAGCCAG	2.41158	3.87807	3.27776	0.735741	-1.35917
hp_mmu-mir-1895_st	CCCACACCTTTTCCTCTTCTTCTTGGCCGGGTTGGCTCCGCCAGCTCCCCCCGAGGAGGACGAGGAGGAGGAGGAATGA	2.14677	2.57576	2.18929	0.980582	-1.0198
hp_mmu-mir-1896_st	AAGGCTTTCCCACACTCATTACAGTGATGTCTTTTGGAACGACCATGGACTCTCTGATGGTGGGTGAGGAGGAGGGCCCGA	2.48589	2.26294	2.26294	1.09852	1.09852
hp_mmu-mir-1897_st	ATTCTCCGTGCTTTGGATGGAGAAAGAGGGGGGAAGTGCGAGCTCCTTCAACTCGTTCTGTCCGGTGAGGAGTGATCCA	3.47979	2.67411	2.38363	1.45987	1.45987
hp_mmu-mir-1898_st	GTATGAACATAGGTCAAGGTTCACAGGGGATCAAGAAATATTATTCTTGTATAATCTGTTTACTTTGACCTAAATACTAGCTT	2.12455	2.63489	2.4432	0.86958	-1.14998
hp_mmu-mir-1899_st	AATCTTAGTCAGCGATGGCCGAATCTGCTTCCTCCTGGTTAGAATGAATGTGCTAAGTGGATTTCAGATTCTGCTCATTCCGTTGAT	2.85918	3.5363	2.28951	1.24882	1.24882
hp_mmu-mir-18a_st	TGCGTGCTTTTTGTTCTAAGGTGCATCTAGTGCAGATAGTGAAGTAGACTAGCATCTACTGCCCTAAGTGCTCCTTCTGGCATAAGA	3.12438	2.32403	2.10798	1.48217	1.48217
hp_mmu-mir-18b_st	TCTCTTGTGTTAAGGTGCATCTAGTGCTGTTAGTGAAGCAGCTTACAATCTACTGCCCTAAATGCCCCTTCTCGCACAGGCTA	2.40551	1.92633	2.8788	0.835592	-1.19676
hp_mmu-mir-18b_x_st	TCTCTTGTGTTAAGGTGCATCTAGTGCTGTTAGTGAAGCAGCTTACAATCTACTGCCCTAAATGCCCCTTCTCGCACAGGCTA	2.83451	2.5374	2.5374	1.11709	1.11709
hp_mmu-mir-190_st	CTGTGTGATATGTTTGATATATTAGGTTGTTATTTAATCCAACTATATATCAAGCATATTCCTACAG	2.46524	2.86833	1.93731	1.27251	1.27251
hp_mmu-mir-1901_st	GATGGGCAGGATTCCCTGAGTGAACGAGTTGAGGCGGCCCCGACTGCCGCTCGTACTCCCGGGGGTCCCGGAGCCCAA	2.28563	2.38307	2.65934	0.85947	-1.16351
hp_mmu-mir-1902_st	GTTTATTTTGGGAGTGTTTGCTGTATAATTGGACTTGATAAAATGTTTAGAGGTGCAGTAGGCATGACTTGAGTAGATAA	2.81302	3.09016	3.09016	0.910316	-1.09852
hp_mmu-mir-1903_st	TTTTTTTCCTCCTTCTTCTTCTTCCTGAGACATGGCCCGGGCAGTGGCTCCTGGAAGAGGAACAAGTGTGGGAAAAGGGA	2.1994	2.22143	2.24367	0.980269	-1.02013
hp_mmu-mir-1904_st	CAAGTTAGCTGTTCTGCTCCTCTGGAGGGAGGTTCCTGTTTGCACACCTCTCTTCAGGTAGATTAAACATTTTATTTGCA	3.05	2.37038	2.41759	1.26159	1.26159
hp_mmu-mir-1905_st	GTGTTGGTCTGCTGCTGGATGCGTTTGATGGTCGCTCCCTTGGGGCCCACCACCAGTCCCACCACGCGGTAGGGTACTCGTA	3.32587	2.41709	2.26761	1.46669	1.46669
hp_mmu-mir-1906-1_s_st	GGACATTAGGAGCAACCTCCTAGGGTTGTTGTGAGAATTAAATGAACTGCAGCAGCCTGAGGCAGGGCTGGGCAGAGACC	2.9138	2.66976	3.34582	0.870876	-1.14827
hp_mmu-mir-1906-2_s_st	GGACATTAGGAGCAACCTCCTAGGGTTGTTGTGAGAATTAAATGAACTGCAGCAGCCTGAGGCAGGGCTGGGCAGAGACC	1.93216	2.1868	2.3979	0.805772	-1.24105
hp_mmu-mir-1907_st	CCCAGCCCCACTCCCCCTCGCTGTCTCTTGCTGGCTGATTTTAATTCTCTCCTACCGGGAGCAGCAGAGGATCTGGAGGTGGCTGGA	3.06426	3.06426	2.93223	1.04503	1.04503
hp_mmu-mir-190b_st	TGCTTCTGTGTGATATGTTTGATATTGGGTTGTTAAATTATGAACCAACTGAATGTCAAGCATACTCTCACAGCAGTAAG	1.96562	2.63799	2.57953	0.762005	-1.31233
hp_mmu-mir-191_st	AGCGGGCAACGGAATCCCAAAAGCAGCTGTTGTCTCCAGAGCATTCCAGCTGCACTTGGATTTCGTTCCCTGCT	2.52886	2.6738	2.16097	1.17024	1.17024
hp_mmu-mir-192_st	CGTGCACAGGGCTCTGACCTATGAATTGACAGCCAGTACTCTTTTCTCTCCTCTGGCTGCCAATTCCATAGGTCACAGGTATGTTCA	3.90868	2.66091	2.49517	1.56649	1.56649
hp_mmu-mir-1927_st	GTATGTTTACCATGTGCATGTAGGTTCAGATCCCTAGAAACCAGAGTTGCAAGTGGCTGTGAACTGACCTCTGGATGTTAGGGACTG	2.60756	2.20396	2.2988	1.13431	1.13431
hp_mmu-mir-1928_st	AGGATAGAGCTTTGCGCATTGTAGGCAAGTGCTCTACCACTGAGCTACATTGCCAGCTCTAACCCCA	2.2172	2.04714	2.26183	0.980269	-1.02013
hp_mmu-mir-1929_st	TTAGAACTGGGAGGTCTTCTAGGACTTTATAGAGCAGAGGTTTGCAGCCTGTGACACTCAGCTCATGGAGACCTAGGTGGCCTTGGG	2.80092	3.09016	2.65518	1.05489	1.05489
hp_mmu-mir-193_st	GAGAGCTGGGTCTTTGCGGGCAAGATGAGAGTGTCAGTTCAACTGGCCTACAAAGTCCCAGTCCTC	4.37915	2.46135	2.92655	1.49635	1.49635
hp_mmu-mir-1930_st	ATGCCCACGGTCACCTCCATAGTACCTGCAGCGTGCTTGACTTTCTCTATGGTGCAGTTACTGTGGCTGTGGCTGTGTTCGTGC	2.68593	3.02564	2.58928	1.03733	1.03733
hp_mmu-mir-1931_st	AGCCATCTCCTAGGCCAGAAGCATTAACTCTTTGAATGCTGCTCGTCAAAGATCTGTTGCAGAGCCTTTGAATTGAAGCTGCTTTAA	2.56719	1.96698	3.54644	0.723879	-1.38145
hp_mmu-mir-1932_st	GCAGGCAGCCGGTCCAGCCTGGCCCTGAGTCTCCGACCCCATTAACTCTCGGGTTGCGGACAGCGCTAGGTCGGCCCTGCTCCCCAG	3.1947	2.31328	1.769	1.80594	1.80594
hp_mmu-mir-1933_st	TCCTGATCCCACAGTCATGGTGTTCGGTCTTAGTTTGTGACCAGTTTAGTTTAACCAGGACCATCAGTGTGACTATTGGATTGGGAC	2.39599	2.78591	2.46784	0.970883	-1.02999
hp_mmu-mir-1934_st	CTGGGCCTTCTTTCTGGTCCCCTGCTTCGTCCTCTGTCCAGATGTTAAGAGGATGACGGTGGGGCTGGTGAGATGGCTCAGCG	2.33385	3.08866	2.05194	1.13738	1.13738
hp_mmu-mir-1936_st	AGGGGGTGAAGGGGAGGCCAGTCACACAGAGGACTTTAGTCTGAGAAATTGAAACTAACTGACCTGCTGTGAACTGGCCTCATGACC	1.94163	2.97548	2.80519	0.692154	-1.44477
hp_mmu-mir-1937a_st	TTCTTGGGGTTCTGGGTGCTCCCAAATCCCGGACGAGCCCCCAAATGTAGGACCCCCCCAATATGGCGACTCCCACTCTAATCCAGG	2.73836	2.79973	3.76725	0.726885	-1.37573
hp_mmu-mir-1937a_x_st	TTCTTGGGGTTCTGGGTGCTCCCAAATCCCGGACGAGCCCCCAAATGTAGGACCCCCCCAATATGGCGACTCCCACTCTAATCCAGG	2.78591	2.54871	1.78339	1.56215	1.56215
hp_mmu-mir-1937b-1_st	GGGTCTCTGAGAACTGGGGTAGGCCACAAATCCCGGACGAGCCCCCACATGTAAGACCCCCATGCTGGGCCTCTGCTTAAGTCCCGG	2.95847	3.35283	3.54644	0.834209	-1.19874
hp_mmu-mir-1937b-1_x_st	GGGTCTCTGAGAACTGGGGTAGGCCACAAATCCCGGACGAGCCCCCACATGTAAGACCCCCATGCTGGGCCTCTGCTTAAGTCCCGG	3.3276	2.30947	4.46856	0.744668	-1.34288
hp_mmu-mir-1937b-2_s_st	GTCTCGGTCTCTTGGGTGGTCGCGTCAATCCCGGACGAGCCCCCAAATGAAAGATCCCCAAAGGGAGACCCTCACTCAAGCCTCGGG	2.6482	3.75497	2.82823	0.936344	-1.06798
hp_mmu-mir-1937b-3_st	TGGGGTCTCTGAGAATTGGGGTAGGCCATAAATCCCGGACGAGCCCCCACATGTAAGATCCCCGAAGCTTAGTCTCTGCTCAAGTCC	2.44506	1.96613	2.29658	1.06465	1.06465
hp_mmu-mir-1937b-3_x_st	TGGGGTCTCTGAGAATTGGGGTAGGCCATAAATCCCGGACGAGCCCCCACATGTAAGATCCCCGAAGCTTAGTCTCTGCTCAAGTCC	2.79964	2.14831	2.34468	1.19404	1.19404
hp_mmu-mir-1937b-4_s_st	GTCTCGGTCTCTTGGGTGGTCGCGTCAATCCCGGACGAGCCCCCAAATGAAAGATCCCCAAAGGGAGATCCTCACTCAAGCCTCGGG	2.33244	2.9762	2.11221	1.10427	1.10427
hp_mmu-mir-1937b-5_s_st	GGTCTCGGTCTCTTGGGTGGTCGCGTCAATCCCGGACGAGCCCCCAAATGAAAGATCCCCAAAGGGAGACCCTCACTCAAGCCTCAG	2.8642	3.0926	2.65518	1.07872	1.07872
hp_mmu-mir-1937c_st	ACATCCAAGGGGTATTCTTGGGTTTCTGGGTGCCCCCAAATCCCGGAAGAGCCCCCATGATGTAA	3.73625	3.49289	3.3367	1.11974	1.11974
hp_mmu-mir-1937c_x_st	ACATCCAAGGGGTATTCTTGGGTTTCTGGGTGCCCCCAAATCCCGGAAGAGCCCCCATGATGTAA	3.1215	3.36422	3.05269	1.02254	1.02254
hp_mmu-mir-1938_st	CTGGGGCGCGGTGGGACTTGTAGTTCGGTCTTCGCTTCGGACGCCCAAGTCTGCATAGCGCGTGGTACGGCTGAACTGCAGTTCCCA	2.83129	2.36654	2.55291	1.10905	1.10905
hp_mmu-mir-1939_st	ATCAAGTCAAGGGGGACCCCTTCGATTCCCTGCCAATGCACTAAATGTAATGGTCTGGAAAATCTCTGAAGGAAGGCCTCAGACTTG	2.42711	2.80589	2.27415	1.06726	1.06726
hp_mmu-mir-193b_st	GGCCCAGAATCGGGGTTTTGAGGGCGAGATGAGTTTGTGTTTTATCCAACTGGCCCACAAAGTCCCGCTTTTGGGGTCA	2.56863	2.95304	3.6531	0.703138	-1.4222
hp_mmu-mir-194-1_st	ATCGGGTGTAACAGCAACTCCATGTGGACTGTGCTCGGATTCCAGTGGAGCTGCTGTTACTTCTGAT	2.25054	2.34765	1.93106	1.16544	1.16544
hp_mmu-mir-194-1_x_st	ATCGGGTGTAACAGCAACTCCATGTGGACTGTGCTCGGATTCCAGTGGAGCTGCTGTTACTTCTGAT	2.49438	2.08147	2.35399	1.05964	1.05964
hp_mmu-mir-194-2_st	GTGGCTCCCACCCTCTGTAACAGCAACTCCATGTGGAAGTGCCCACTGGTTCCAGTGGGGCTGCTGTTATCTGGGGTGGCGGCTAG	2.60043	2.60043	2.16745	1.19976	1.19976
hp_mmu-mir-194-2_x_st	GTGGCTCCCACCCTCTGTAACAGCAACTCCATGTGGAAGTGCCCACTGGTTCCAGTGGGGCTGCTGTTATCTGGGGTGGCGGCTAG	2.5059	2.89375	2.45154	1.02217	1.02217
hp_mmu-mir-1940_st	AGCCAGGATGCAGCCTGCTATGGAGGACTGAGAAGGTGGAGCAGTTCTGTACCGTGCTGCCTTCCATTGGTTAAGACCTCCAACAGT	3.20452	2.2164	1.93098	1.65954	1.65954
hp_mmu-mir-1941_st	CAGCAGGGTGGGAGGGAGATGCTGGTACAGAGGCTTGGGGTTTTGAGGGCATCTTAGCAGTATCTCCCATCCACCCACCTGGG	3.04956	5.62912	2.67511	1.13997	1.13997
hp_mmu-mir-1942_st	GAAGAGGCCTATTTAATGTTAGACATCTAACCTCAGATGTCTTCATCTGGTTGGCCTCTTGTA	1.97582	2.3981	2.11902	0.932419	-1.07248
hp_mmu-mir-1943_st	GGCTGGGAAGGGAGGATCTGGGCACCTGGACCAGCTCCTCCCTGCAGGTGCCAGCTCCTCCCTTCCCAGTCAC	3.12064	3.65928	2.57269	1.21298	1.21298
hp_mmu-mir-1944_st	AAGCCACAAATGATGAACCTTTTGACGGGCGGACAGAAACTCTGTGCTGAATGTCAAGTTCTGATTTGGCTTTA	3.54644	3.18782	2.84354	1.24719	1.24719
hp_mmu-mir-1945_st	CTGAACTCCGACTCCCGTCAGCCCCCGAGAAAACCGCACCGGGTCTTCGCGGGTACTGTCGGGACTTGTAGTTTAGCT	2.71818	2.95711	2.47248	1.09937	1.09937
hp_mmu-mir-1946a_st	AACTTAAAGAAATCTATAGCCGGGCAGTGGTGGCACACACTTTTAATCCCAACACTTGTGAGGCACAGGCAGGTGGATTTCTGATCA	3.71111	2.65621	3.38886	1.09509	1.09509
hp_mmu-mir-1946a_x_st	AACTTAAAGAAATCTATAGCCGGGCAGTGGTGGCACACACTTTTAATCCCAACACTTGTGAGGCACAGGCAGGTGGATTTCTGATCA	2.61873	2.14677	2.84609	0.920117	-1.08682
hp_mmu-mir-1946b_st	GGGATTAAAGGCGTGCGCCACCACTGCCCAGCTTTCAGAGTGAATTTGAGGCTATCTGGCTATATGAGACTGCTTCACAGGGTAAGA	2.29901	2.63671	2.31181	0.994463	-1.00557
hp_mmu-mir-1946b_x_st	GGGATTAAAGGCGTGCGCCACCACTGCCCAGCTTTCAGAGTGAATTTGAGGCTATCTGGCTATATGAGACTGCTTCACAGGGTAAGA	2.15762	1.84902	3.39916	0.63475	-1.57542
hp_mmu-mir-1947_st	GAACAAGGTGGTGGAGGACGAGCTAGCTGAGTGCTGCAGACACTCTAAGAGCACTGAGCTAGCTCTCCCTCCATGCCCTGCTCAA	2.46492	2.46492	2.42671	1.01575	1.01575
hp_mmu-mir-1948_st	ATTCTCACCTTACTATATGAGTATTCTGCCTAAATGTGGTGTACGGATACATTTAGGCAGAGCACTCGTACAGTAAGGTGAGAAT	2.39167	2.46135	1.88222	1.27066	1.27066
hp_mmu-mir-1949_st	GCTGGTTGGCATTCTGGGCCTGGTTCATGCCACCTCTGTTGTTAACTATACCAGGATGTCAGCATAGTTG	2.52176	2.82945	2.14677	1.17467	1.17467
hp_mmu-mir-195_st	ACACCCAACTCTCCTGGCTCTAGCAGCACAGAAATATTGGCATGGGGAAGTGAGTCTGCCAATATTGGCTGTGCTGCTCCAGGCAGG	2.53743	3.53233	3.64056	0.69699	-1.43474
hp_mmu-mir-1950_st	GCTTTTTCTGCATCTAAGGATATGGTCATTTAATTGTTTTTTTCCATGATCATCTCCTTAAATGCAGAAAAAGC	2.52101	2.67376	2.53485	0.994539	-1.00549
hp_mmu-mir-1951_st	TGGGTGGGGGTTTAGAAACCACCTCTCTTCACTTACTTCTGAAAGTTAAAAGGTAGTGGAGACTGGTGTGGCTAAACCTCTTGCCTC	2.21819	2.14677	2.35399	0.942308	-1.06122
hp_mmu-mir-1952_st	CCCTCTCTTATTGATCTCCACCCTCCTTCTGTGCAGGCTTATTTCCTGCTCCAAGGTGTGGATGACAAAAGAGATGGAA	2.94844	1.96698	2.44748	1.20468	1.20468
hp_mmu-mir-1953_st	GGTGCTGCCTGGTCTTGGGAAAGTTCTCAGGCTTCTGAGAATTTGCAGGAGCAGAAGGCTGTGAGGTTCCCCTCTTCCTGGCAGCCC	2.78591	2.78591	2.47703	1.1247	1.1247
hp_mmu-mir-1954_st	GAGGTCAGCCAGAACTGCAGAGTGAGACCCTGTTGTTTGTTTGTTTGTTTGAGACGGGGTTTCTCTGTGTAGCCCTGGCTATCCTA	3.11299	3.0729	1.93931	1.60521	1.60521
hp_mmu-mir-1954_x_st	GAGGTCAGCCAGAACTGCAGAGTGAGACCCTGTTGTTTGTTTGTTTGTTTGAGACGGGGTTTCTCTGTGTAGCCCTGGCTATCCTA	2.40774	3.2136	2.40774	1	1
hp_mmu-mir-1955_st	CTGGTTTACTTACTACAAGTCCCAGGATGCACTGCAGCTTTTTCTTAACTTCAGATAAGAGCATTGCATGCTGGGACATGTAGTTGG	2.83899	2.62226	2.23553	1.26994	1.26994
hp_mmu-mir-1956_st	CTTCAGTCCAGGGCTGAGTCAGCGGAGCCCCGAGTGGCTTCCCTGGCTGGCACCTGGACGTAGGC	3.22149	2.56518	2.78147	1.1582	1.1582
hp_mmu-mir-1957_st	CTGGAAAGTAGCTCAGTGGTAGAGCATATGACCAGCATGTGCAAGGCCCTGAGTTTATCCCCAGCA	2.51696	2.45234	2.74702	0.916248	-1.09141
hp_mmu-mir-1958_s_st	AGCCTAGAAGAGAACTTACTGCTTCCACTTTCCTATAGTTTAATTTCTAACTGCATTCTATAGGAAAGTGGAAGCAGTAAGTTCTCT	2.6416	3.18888	2.30807	1.1445	1.1445
hp_mmu-mir-1958_st	AGCCTAGAAGAGAACTTACTGCTTCCACTTTCCTATAGTTTAATTTCTAACTGCATTCTATAGGAAAGTGGAAGCAGTAAGTTCTCT	2.89993	2.23462	2.6468	1.09564	1.09564
hp_mmu-mir-1959_st	AGGGCCGGGGATGTAGCTCAGTGGAGGAGTCCTTGCCCAAAACAGGAAAGGCCCTGGGTTATATCCACGGCCCCA	2.53473	3.36422	2.42551	1.04503	1.04503
hp_mmu-mir-1960_st	CAGAGTGAGCAGCCAGTGCTGTTAGAAGAGGGCTGAGAGCAGGGAGAGCTCTCTTCTGCAGCACTGACTTTTCCTCTG	3.70414	2.76293	2.3902	1.54972	1.54972
hp_mmu-mir-1961_st	GCTAGCCATATCTGAAGTTCAACACGCCCTCCCCTCTTCCTATACGTCTATGGAGGATTTACCTCCATATACCTTGAGAGATGAGGT	2.65275	2.73492	2.4224	1.09509	1.09509
hp_mmu-mir-1962_st	TGTGGCATTTGCAAACTATGTAGTCAGTCAGTGGTCCCATCTGTCTGCCTCTCTCTCGTTCAGTTTCCATGGAGAGGCTGGCACTGG	2.57839	2.95386	2.54875	1.01163	1.01163
hp_mmu-mir-1963_st	CTGGGACGAGATCATGAGGCCTTCCTGGCCACTGGGAAGGACTCGGCCCTTGTCCCGCA	2.97125	1.98298	2.48038	1.1979	1.1979
hp_mmu-mir-1964_st	CTTTCTTGCGAAGCTGGAGCACAAAAGCCGGTGCCGGTGTGATGCCTACACCGACTTCTGGGCTCCGGCTTTGGAAGGAAGGA	2.61237	2.37584	3.19047	0.818804	-1.22129
hp_mmu-mir-1965_st	GGCTTGCGCCACCATGCCTGGCTCTTTTGTTTTGTTTTATTGTGATCCTAGATCCCATCATGTGAACATCTAGATTTAGCATCACAA	2.2128	2.58754	2.02494	1.09277	1.09277
hp_mmu-mir-1965_x_st	GGCTTGCGCCACCATGCCTGGCTCTTTTGTTTTGTTTTATTGTGATCCTAGATCCCATCATGTGAACATCTAGATTTAGCATCACAA	2.5442	2.16568	2.31994	1.09666	1.09666
hp_mmu-mir-1966_st	GTAGAATAGTGTTGGAAGGGAGCTGGCTCAGGAGAGAGTCCTGAGATTTAGGCTCTTTCTGACTCAACTCTCCCTTAGCAAGTCAAG	2.32485	2.40506	2.05449	1.1316	1.1316
hp_mmu-mir-1967_st	CCTGAATTCTGTTTCTTTCTCTCTTTGCTCCTTTTGTCTGACATTCATGAGGATCCTGGGGAGAAGATGCAGAATTCCCTGG	2.83494	2.08811	2.34738	1.20771	1.20771
hp_mmu-mir-1968_st	CCTCCTCTGCAGCTGTTAAGGATGGTGGACTATTGTTAGGGCCACCACCTCTGCAGCTGTTAAGGAGG	3.79795	2.32421	2.22405	1.70767	1.70767
hp_mmu-mir-1969_st	ATAGTGCTAGAGGCTGAAGATGGAGACTTTAACATGGGTGCTCTTAAAATCTGTTAACATCCATGCTGCCTCCATTTCTGGTCTGTA	2.94921	3.14363	3.23494	0.911674	-1.09688
hp_mmu-mir-196a-1_st	TGAGCCGGGACTGTTGAGTGAAGTAGGTAGTTTCATGTTGTTGGGCCTGGCTTTCTGAACACAACGACATCAAACCACCTGATTCAT	2.44654	2.58673	2.57031	0.951846	-1.05059
hp_mmu-mir-196a-2_st	AGCTGATCTGTGGCTTAGGTAGTTTCATGTTGTTGGGATTGAGTTTTGAACTCGGCAACAAGAAACTGCCTGAGTTACATCAGTC	2.51218	2.67106	2.58747	0.970904	-1.02997
hp_mmu-mir-196b_st	AACTGGTCGGTGATTTAGGTAGTTTCCTGTTGTTGGGATCCACCTTTCTCTCGACAGCACGACACTGCCTTCATTACTTCAGTTG	3.09269	2.23003	1.89698	1.63032	1.63032
hp_mmu-mir-1970_st	GATGTGCATTGTTGGAGGAAATGTGTCACTGGGGATAGGCTTTGAGGTTTCAGAAGCTCAGTCAGGCCTAGTGGCACTCACTCTTCC	2.67169	2.03821	2.29126	1.16603	1.16603
hp_mmu-mir-1971_st	GCATCATTTGGTAAAGGCTGGGCTGAGAGGACATCTTTGTTCCATGGACCCAGTAGATAGGCAGCTTCTGCTTCCAGGAACAACTTG	3.44532	2.89889	2.00641	1.71715	1.71715
hp_mmu-mir-1981_st	GTAAAGGCTGGGCTTAGACGTGGCCTTTGGGTGTGGAATGCACTTCCGTTTGTAACCGCCATCTAACCCTGGCCTTTGACAG	2.40286	2.46135	3.09016	0.777584	-1.28604
hp_mmu-mir-1983_st	CCTTTACAGAGAAAGCATGCTCCAGTGGCGCAATCGGTTAGCGCGCGGTACTTATACAGCAGTATATGTGCGGGTGATGCCGAGGTT	2.91818	2.16374	1.97159	1.48012	1.48012
hp_mmu-mir-199a-1_st	GCCATCCCAGTGTTCAGACTACCTGTTCAGGAGGCTGGGACATGTACAGTAGTCTGCACATTGGTTAGGC	2.62286	2.79659	3.40815	0.769584	-1.2994
hp_mmu-mir-199a-1_x_st	GCCATCCCAGTGTTCAGACTACCTGTTCAGGAGGCTGGGACATGTACAGTAGTCTGCACATTGGTTAGGC	1.75204	3.06528	2.55011	0.687044	-1.45551
hp_mmu-mir-199a-2_st	TGGAAGCTTCAGGAGATCCTGCTCCGTCGCCCCAGTGTTCAGACTACCTGTTCAGGACAATGCCGTTGTACAGTAGTCTGCACATTG	2.20886	2.64785	2.23972	0.986219	-1.01397
hp_mmu-mir-199b_st	CCAGAGGATACCTCCACTCCGTCTACCCAGTGTTTAGACTACCTGTTCAGGACTCCCAAATTGTACAGTAGTCTGCACATTGGTTAG	3.94059	2.40789	2.27422	1.73272	1.73272
hp_mmu-mir-199b_x_st	CCAGAGGATACCTCCACTCCGTCTACCCAGTGTTTAGACTACCTGTTCAGGACTCCCAAATTGTACAGTAGTCTGCACATTGGTTAG	2.08422	2.65518	2.48375	0.839144	-1.19169
hp_mmu-mir-19a_st	GCAGCCCTCTGTTAGTTTTGCATAGTTGCACTACAAGAAGAATGTAGTTGTGCAAATCTATGCAAAACTGATGGTGGCCTGC	2.66532	2.20549	2.21799	1.20169	1.20169
hp_mmu-mir-19b-1_st	CACTGGTCTATGGTTAGTTTTGCAGGTTTGCATCCAGCTGTATAATATTCTGCTGTGCAAATCCATGCAAAACTGACTGTGGTGGTG	2.3816	2.02508	2.06265	1.15463	1.15463
hp_mmu-mir-19b-1_x_st	CACTGGTCTATGGTTAGTTTTGCAGGTTTGCATCCAGCTGTATAATATTCTGCTGTGCAAATCCATGCAAAACTGACTGTGGTGGTG	2.72535	2.10443	2.30282	1.18348	1.18348
hp_mmu-mir-19b-2_st	ACTTACGATTAGTTTTGCAGATTTGCAGTTCAGCGTATATGTGAATATATGGCTGTGCAAATCCATGCAAAACTGATTGTGGGA	2.64079	2.0956	2.54462	1.03779	1.03779
hp_mmu-mir-19b-2_x_st	ACTTACGATTAGTTTTGCAGATTTGCAGTTCAGCGTATATGTGAATATATGGCTGTGCAAATCCATGCAAAACTGATTGTGGGA	2.57785	2.34068	2.33089	1.10595	1.10595
hp_mmu-mir-200a_st	CTGGGCCTCTGTGGGCATCTTACCGGACAGTGCTGGATTTCTTGGCTTGACTCTAACACTGTCTGGTAACGATGTTCAAAGGTGACC	2.78591	2.14677	2.19737	1.26784	1.26784
hp_mmu-mir-200b_st	GCCGTGGCCATCTTACTGGGCAGCATTGGATAGTGTCTGATCTCTAATACTGCCTGGTAATGATGACGGC	2.6291	2.41922	2.60182	1.01049	1.01049
hp_mmu-mir-200c_st	CCCTCGTCTTACCCAGCAGTGTTTGGGTGCTGGTTGGGAGTCTCTAATACTGCCGGGTAATGATGGAGG	2.28827	2.77489	2.24356	1.01993	1.01993
hp_mmu-mir-201_st	TACCTTACTCAGTAAGGCATTGTTCTTCTATATTAATAAATGAACAGTGCCTTTCTGTGTAGGGTA	2.83231	2.20973	3.09016	0.916559	-1.09104
hp_mmu-mir-202_st	GTTCCTTTTTCCTATGCATATACTTCTTTGTGGATCTGGTCTAAAGAGGTATAGCGCATGGGAAGATGGAGC	2.33427	2.51507	1.94392	1.20081	1.20081
hp_mmu-mir-203_st	GCCTGGTCCAGTGGTTCTTGACAGTTCAACAGTTCTGTAGCACAATTGTGAAATGTTTAGGACCACTAGACCCGGC	2.88886	1.96724	2.58456	1.11774	1.11774
hp_mmu-mir-204_st	TGGACTTCCCTTTGTCATCCTATGCCTGAGAATATATGAAGGAGGCTGGGAAGGCAAAGGGACGTTCA	4.40612	5.79593	2.75788	1.59765	1.59765
hp_mmu-mir-204_x_st	TGGACTTCCCTTTGTCATCCTATGCCTGAGAATATATGAAGGAGGCTGGGAAGGCAAAGGGACGTTCA	4.26093	4.50036	2.82941	1.50595	1.50595
hp_mmu-mir-205_st	CTCTTGTCCTTCATTCCACCGGAGTCTGTCTTATGCCAACCAGATTTCAGTGGAGTGAAGCTCAGGAG	2.19112	3.20417	2.23591	0.97997	-1.02044
hp_mmu-mir-206_st	CCAGGCCACATGCTTCTTTATATCCTCATAGATATCTCAGCACTATGGAATGTAAGGAAGTGTGTGGTTTTGG	2.34707	2.78263	2.6608	0.882091	-1.13367
hp_mmu-mir-207_st	AAGGCAGGGGTGAGGGGCTGCGGGAGGAGCCGGGCGGAGGCTGCGGCTTGCGCTTCTCCTGGCTCTCCTCCCTCTCTTT	3.38072	3.59721	3.92276	0.861821	-1.16033
hp_mmu-mir-208a_st	TTCCTTTGACGGGTGAGCTTTTGGCCCGGGTTATACCTGACACTCACGTATAAGACGAGCAAAAAGCTTGTTGGTCAGAGGAG	2.75442	2.65916	3.54912	0.776087	-1.28852
hp_mmu-mir-208b_st	CCTCTCAGGGAAGCTTTTTGCTCGCGTTATGTTTCTCATCCGAATATAAGACGAACAAAAGGTTTGTCTGAGGGCTG	2.13472	2.21465	2.65518	0.803985	-1.2438
hp_mmu-mir-20a_st	GTGTGATGTGACAGCTTCTGTAGCACTAAAGTGCTTATAGTGCAGGTAGTGTGTAGCCATCTACTGCATTACGAGCACTTAAAGTAC	3.28087	2.85898	2.69867	1.21574	1.21574
hp_mmu-mir-20b_st	CCTAGTAGTGCCAAAGTGCTCATAGTGCAGGTAGTTTTTATACCACTCTACTGCAGTGTGAGCACTTCTAGTACTCCTGG	2.4908	1.9057	2.10494	1.18331	1.18331
hp_mmu-mir-21_st	TGTACCACCTTGTCGGATAGCTTATCAGACTGATGTTGACTGTTGAATCTCATGGCAACAGCAGTCGATGGGCTGTCTGACATTTTG	1.99854	2.18159	2.20814	0.905079	-1.10488
hp_mmu-mir-210_st	CCGGGGCAGTCCCTCCAGGCTCAGGACAGCCACTGCCCACCGCACACTGCGTTGCTCCGGACCCACTGTGCGTGTGACAGCGGCTGA	2.27291	3.717	2.09262	1.08616	1.08616
hp_mmu-mir-211_st	CTGCTTGGACCTGTGACCTGTGGGCTTCCCTTTGTCATCCTTTGCCTAGGCCTCTGAGTGAGGCAAGGACAGCAAAGGGGGGCTCAG	2.06212	2.10205	2.08866	0.987293	-1.01287
hp_mmu-mir-212_st	GGGCAGCGCGCCGGCACCTTGGCTCTAGACTGCTTACTGCCCGGGCCGCCTTCAGTAACAGTCTCCAGTCACGGCCACCGACGCCTG	2.87968	2.15009	3.55192	0.810739	-1.23344
hp_mmu-mir-2132_st	GTTTCAAAGTTTTGATAGGTTCTACGCATGCTACTAGAAAAGTGTTTAACAGTCATTCCAAGCTGTGAGTCTGTGTGATACAACGAA	2.67972	2.3969	2.7812	0.963509	-1.03787
hp_mmu-mir-2135-4_x_st	CTCCGAAGTTTCCCTCAGGATAGCTGGCGTTCTCGCTCTTTTCCCGACGTACGCAGTTTTATCCGGTAAAGCGAATGATTAGAGGTC	2.7023	2.17636	1.95534	1.38201	1.38201
hp_mmu-mir-2135-5_x_st	GAAGTTTCCCTCAGGATAGCTGGCGCTCTCGCTCTTTCCCGACGCACGCAGTTTTATCCAGTAAAGCGAATGATTAGAGGTCTTGGG	2.00412	3.55508	2.80611	0.7142	-1.40017
hp_mmu-mir-2136_st	CCGCGTATCCAGTCAGGAGTCAGTTAGGAAGTTTTAAGTCTGAATTAATTCTGGGTGTTGACTGAGATGTGGTGG	2.73997	2.81684	2.39685	1.14315	1.14315
hp_mmu-mir-2136_x_st	CCGCGTATCCAGTCAGGAGTCAGTTAGGAAGTTTTAAGTCTGAATTAATTCTGGGTGTTGACTGAGATGTGGTGG	2.13393	2.37379	2.19086	0.974011	-1.02668
hp_mmu-mir-2137_st	GTAGTATACCTCCTTCCTGCTGCCTTGTTGGCTTGCCGGCGGGAGCCCCAGGGAGTAGAGCATTGC	3.52384	2.80004	2.63432	1.33767	1.33767
hp_mmu-mir-2139_st	AGAAGGAGCAGAGGGCCAGGACTGGCATTTGGACATGCAGCTGCCCAGCAAGGTGGTGCTGTCCGCAGCTGCGCTGCTCCTGGTAAC	2.08422	2.23363	1.75469	1.1878	1.1878
hp_mmu-mir-214_st	GGCCTGGCTGGACAGAGTTGTCATGTGTCTGCCTGTCTACACTTGCTGTGCAGAACATCCGCTCACCTGTACAGCAGGCACAGACAG	2.12727	2.67411	2.16747	0.981452	-1.0189
hp_mmu-mir-2141_st	AAGGTAGGAGGTGTCAGAAAAGTTGCCACAGGGATAATTGGCTAATGGTGGCCAAGTGCCCATAGCAACGTAGCTTTTTGATCCTTT	2.9341	2.52494	3.23736	0.906325	-1.10336
hp_mmu-mir-2145-1_st	AATCATGTCTATAGTCATACCACCCTGAACATGCTTGATCCCATCTGATCTCAGAAGCCGAGCAGGGTCGGGCCTGGTTAATGCATA	3.50684	2.5715	3.22319	1.088	1.088
hp_mmu-mir-2145-2_st	ATCTCGGAAGCTAAGCAGGGTCGGGCCTGGTTAGCACTTGGATGGGAGAAACGTTGAGGCGGGCTAGAGTGCAATTCCCAACACTGG	2.5451	2.8849	2.01966	1.26016	1.26016
hp_mmu-mir-215_st	AGCTCTCAGCATCAACGGTGTACAGGAGAATGACCTATGATTTGACAGACCGTGCAGCTGTGTATGTCTGTCATTCTGTAGGCCAAT	2.79092	2.33123	2.93644	0.950442	-1.05214
hp_mmu-mir-216a_st	TTGGTTTAATCTCAGCTGGCAACTGTGAGATGTCCCTATCATTCCTCACAGTGGTCTCTGGGATTATGCTAA	2.41694	2.69536	2.77277	0.871668	-1.14723
hp_mmu-mir-216b_st	TTGGCAGACTGGGAAATCTCTGCAGGCAAATGTGATGTCACTGAAGAAACCACACACTTACCTGTAGAGATTCTTCAGTCTGACAA	2.26319	2.57789	2.48167	0.911965	-1.09653
hp_mmu-mir-217_st	AAACATAGTCATTACAGTTTTTGATGTTGCAGATACTGCATCAGGAACTGACTGGATAAGACTTAATCCCCATCAGTTCCTAATGCA	2.38793	2.21312	2.25884	1.05715	1.05715
hp_mmu-mir-218-1_st	GTGATAATGGAGCGAGATTTTCTGTTGTGCTTGATCTAACCATGTGCTTGCGAGGTATGAGAAAAACATGGTTCCGTCAAGCACCAT	3.03953	2.34312	3.18301	0.954925	-1.0472
hp_mmu-mir-218-2_st	GACCAGTTGCCGCGGGGCTTTCCTTTGTGCTTGATCTAACCATGTGGTGGAACGATGGAAACGGAACATGGTTCTGTCAAGCACCGC	2.70984	2.28491	2.32471	1.16567	1.16567
hp_mmu-mir-2183_st	ATATTCTTGAACCCCTGACCTCCTGCTTTCAAGTGATGGGGTTCTAAGAATCTGCATAAT	1.96495	2.14869	1.98794	0.988435	-1.0117
hp_mmu-mir-219-1_st	CCGTCCCGGGCCGCGGCTCCTGATTGTCCAAACGCAATTCTCGAGTCTCTGGCTCCGGCCGAGAGTTGCGTCTGGACGTCCCGAGCC	3.28508	2.2164	3.41423	0.962174	-1.03931
hp_mmu-mir-219-2_st	ACTCAGGGGCTTCGCCACTGATTGTCCAAACGCAATTCTTGTACGAGTCTGCGGCCAACCGAGAATTGTGGCTGGACATCTGTGGTT	3.31206	2.33935	2.33935	1.4158	1.4158
hp_mmu-mir-22_st	ACCTGGCTGAGCCGCAGTAGTTCTTCAGTGGCAAGCTTTATGTCCTGACCCAGCTAAAGCTGCCAGTTGAAGAACTGTTGCCCTCTG	3.00699	2.68044	2.35399	1.2774	1.2774
hp_mmu-mir-220_st	TTGTAGGGCTCCACCACAGTGTCAGACACTTTGGGTGAGGGCACCACACTGAAGGTGTTCATGATGCGGTCGGGATACTCCTCACG	2.37718	2.21809	1.96604	1.20912	1.20912
hp_mmu-mir-221_st	ATCCAGGTCTGGGGCATGAACCTGGCATACAATGTAGATTTCTGTGTTTGTTAGGCAACAGCTACATTGTCTGCTGGGTTTCAGGCT	2.53768	2.26545	2.43231	1.04332	1.04332
hp_mmu-mir-222_st	CCCTCAGTGGCTCAGTAGCCAGTGTAGATCCTGTCTTTGGTAATCAGCAGCTACATCTGGCTACTGGGTCTCTGGTGGC	3.2588	2.15828	2.19077	1.48751	1.48751
hp_mmu-mir-223_st	TCTGGCCATCTGCAGTGTCACGCTCCGTGTATTTGACAAGCTGAGTTGGACACTCTGTGTGGTAGAGTGTCAGTTTGTCAAATACCC	2.28827	2.59345	2.14677	1.06591	1.06591
hp_mmu-mir-224_st	GGGCTTTTAAGTCACTAGTGGTTCCGTTTAGTAGATGGTTTGTGCATTGTTTCAAAATGGTGCCCTAGTGACTACAAAGCCC	2.57785	2.28827	2.79526	0.922225	-1.08433
hp_mmu-mir-23a_st	CGGACGGCTGGGGTTCCTGGGGATGGGATTTGATGCCAGTCACAAATCACATTGCCAGGGATTTCCAACTGACCC	2.16329	2.30588	2.16329	1	1
hp_mmu-mir-23a_x_st	CGGACGGCTGGGGTTCCTGGGGATGGGATTTGATGCCAGTCACAAATCACATTGCCAGGGATTTCCAACTGACCC	2.21338	2.36766	2.22234	0.995967	-1.00405
hp_mmu-mir-23b_st	GGCTGCTTGGGTTCCTGGCATGCTGATTTGTGACTTGAGATTAAAATCACATTGCCAGGGATTACCACGCAACC	2.30282	2.52576	2.38546	0.965354	-1.03589
hp_mmu-mir-23b_x_st	GGCTGCTTGGGTTCCTGGCATGCTGATTTGTGACTTGAGATTAAAATCACATTGCCAGGGATTACCACGCAACC	2.00511	2.00511	2.40302	0.834411	-1.19845
hp_mmu-mir-24-1_st	CTCCGGTGCCTACTGAGCTGATATCAGTTCTCATTTCACACACTGGCTCAGTTCAGCAGGAACAGGAG	2.26363	2.29023	1.89041	1.19743	1.19743
hp_mmu-mir-24-1_x_st	CTCCGGTGCCTACTGAGCTGATATCAGTTCTCATTTCACACACTGGCTCAGTTCAGCAGGAACAGGAG	2.68706	4.5795	2.22391	1.20826	1.20826
hp_mmu-mir-24-2_st	GCCTCTCTCCGGGCTCCGCCTCCCGTGCCTACTGAGCTGAAACAGTTGATTCCAGTGCACTGGCTCAGTTCAGCAGGAACAGGAGTC	3.20646	2.06891	2.71543	1.18083	1.18083
hp_mmu-mir-24-2_x_st	GCCTCTCTCCGGGCTCCGCCTCCCGTGCCTACTGAGCTGAAACAGTTGATTCCAGTGCACTGGCTCAGTTCAGCAGGAACAGGAGTC	3.44396	2.465	2.09319	1.64532	1.64532
hp_mmu-mir-25_st	GGCCAGTGTTGAGAGGCGGAGACTTGGGCAATTGCTGGACGCTGCCCTGGGCATTGCACTTGTCTCGGTCTGACAGTGCCGGCC	2.42726	1.96935	2.24109	1.08307	1.08307
hp_mmu-mir-26a-1_st	AAGGCCGTGGCCTCGTTCAAGTAATCCAGGATAGGCTGTGCAGGTCCCAAGGGGCCTATTCTTGGTTACTTGCACGGGGACGCGGGC	2.40406	2.84627	2.61348	0.919869	-1.08711
hp_mmu-mir-26a-1_x_st	AAGGCCGTGGCCTCGTTCAAGTAATCCAGGATAGGCTGTGCAGGTCCCAAGGGGCCTATTCTTGGTTACTTGCACGGGGACGCGGGC	2.70769	3.12637	2.65518	1.01977	1.01977
hp_mmu-mir-26a-2_st	GGCTGCGGCTGGATTCAAGTAATCCAGGATAGGCTGTGTCCGTCCATGAGGCCTGTTCTTGATTACTTGTTTCTGGAGGCAGCG	2.26569	3.09016	2.29633	0.986657	-1.01352
hp_mmu-mir-26a-2_x_st	GGCTGCGGCTGGATTCAAGTAATCCAGGATAGGCTGTGTCCGTCCATGAGGCCTGTTCTTGATTACTTGTTTCTGGAGGCAGCG	2.03863	2.54956	2.9337	0.694901	-1.43905
hp_mmu-mir-26b_st	TGCCCGGGACCCAGTTCAAGTAATTCAGGATAGGTTGTGGTGCTGACCAGCCTGTTCTCCATTACTTGGCTCGGGGGCCGGTGCC	2.75072	2.78173	3.19176	0.861821	-1.16033
hp_mmu-mir-27a_st	TGGCCTGAGGAGCAGGGCTTAGCTGCTTGTGAGCAAGGTCCACAGCAAAGTCGTGTTCACAGTGGCTAAGTTCCGCCCCCTGGACCC	2.85712	1.96479	2.65864	1.07465	1.07465
hp_mmu-mir-27a_x_st	TGGCCTGAGGAGCAGGGCTTAGCTGCTTGTGAGCAAGGTCCACAGCAAAGTCGTGTTCACAGTGGCTAAGTTCCGCCCCCTGGACCC	2.36169	2.26047	2.16307	1.09182	1.09182
hp_mmu-mir-27b_st	AGGTGCAGAGCTTAGCTGATTGGTGAACAGTGATTGGTTTCCGCTTTGTTCACAGTGGCTAAGTTCTGCACCT	2.22723	1.96698	2.65518	0.838824	-1.19215
hp_mmu-mir-27b_x_st	AGGTGCAGAGCTTAGCTGATTGGTGAACAGTGATTGGTTTCCGCTTTGTTCACAGTGGCTAAGTTCTGCACCT	2.58955	2.88706	2.61397	0.990659	-1.00943
hp_mmu-mir-28_st	GGTCCCTACCTTCAAGGAGCTCACAGTCTATTGAGTTGCCTTTCTGATTCTCCCACTAGATTGTGAGCTGCTGGAGGGCAGGCACT	2.95058	4.1073	2.53993	1.16168	1.16168
hp_mmu-mir-2861_st	CTCCTCTGCAGCTCCGGCTCCCCCTGGCCTCCCGGGAACTACAAGTCCCAGGGGGCCTGGCGGCGGGCGGAGACCGGAAGAG	2.55932	2.38422	2.06773	1.23774	1.23774
hp_mmu-mir-290_st	CTCATCTTGCGGTACTCAAACTATGGGGGCACTTTTTTTTTTCTTTAAAAAGTGCCGCCTAGTTTTAAGCCCCGCCGGTTGAG	2.23465	2.28827	2.55827	0.8735	-1.14482
hp_mmu-mir-291a_st	CCTATGTAGCGGCCATCAAAGTGGAGGCCCTCTCTTGAGCCTGAATGAGAAAGTGCTTCCACTTTGTGTGCCACTGCATGGG	2.12526	2.4945	2.92379	0.726885	-1.37573
hp_mmu-mir-291a_x_st	CCTATGTAGCGGCCATCAAAGTGGAGGCCCTCTCTTGAGCCTGAATGAGAAAGTGCTTCCACTTTGTGTGCCACTGCATGGG	4.49166	2.46541	2.46541	1.82187	1.82187
hp_mmu-mir-291b_st	ACATACAGTGTCGATCAAAGTGGAGGCCCTCTCCGCGGCTTGGCGGGAAAGTGCATCCATTTTGTTTGTCTCTGTGTGT	2.6945	2.41033	2.78649	0.966988	-1.03414
hp_mmu-mir-291b_x_st	ACATACAGTGTCGATCAAAGTGGAGGCCCTCTCCGCGGCTTGGCGGGAAAGTGCATCCATTTTGTTTGTCTCTGTGTGT	2.04232	3.04806	3.35281	0.609138	-1.64167
hp_mmu-mir-292_st	CAGCCTGTGATACTCAAACTGGGGGCTCTTTTGGATTTTCATCGGAAGAAAAGTGCCGCCAGGTTTTGAGTGTCACCGGTTG	2.19168	2.95449	2.21679	0.988676	-1.01145
hp_mmu-mir-293_st	TTCAATCTGTGGTACTCAAACTGTGTGACATTTTGTTCTTTGTAAGAAGTGCCGCAGAGTTTGTAGTGTTGCCGATTGAG	2.14136	2.56484	3.23658	0.661613	-1.51146
hp_mmu-mir-294_st	TTCCATATAGCCATACTCAAAATGGAGGCCCTATCTAAGCTTTTAAGTGGAAAGTGCTTCCCTTTTGTGTGTTGCCATGTGGAG	2.97764	2.64555	2.14677	1.38703	1.38703
hp_mmu-mir-295_st	GGTGAGACTCAAATGTGGGGCACACTTCTGGACTGTACATAGAAAGTGCTACTACTTTTGAGTCTCTCC	2.33721	2.37071	2.26384	1.03241	1.03241
hp_mmu-mir-296_st	GGGCCTTTCTGGAGGGCCCCCCCTCAATCCTGTTGTGCTCGCTTCAGAGGGTTGGGTGGAGGCTCTCCTGAAGGTGTCC	1.98737	2.65018	3.08434	0.644343	-1.55197
hp_mmu-mir-297a-1_st	ATATGTATGTATGTATGTATGTGTGCATGTGCATGTGCATGTATGCATATTGCATGTATATATTATGCATACATGT	2.24333	2.224	1.74586	1.28494	1.28494
hp_mmu-mir-297a-1_x_st	ATATGTATGTATGTATGTATGTGTGCATGTGCATGTGCATGTATGCATATTGCATGTATATATTATGCATACATGT	2.8796	2.49398	2.77795	1.03659	1.03659
hp_mmu-mir-297a-2_st	TGTATGTGCATGCATATGTGCTCATGTGTGTGTACATGTATGTGTGCATGTGCATGTATATATG	3.18371	3.5213	2.6222	1.21414	1.21414
hp_mmu-mir-297a-3_x_st	CTGTGTGTATATGTATGTGTGCATGTGCATGTGTGTATATGAATATACATATACATACACACATACCCATACAAACATGCACACAAA	2.72359	6.89366	3.87326	0.703177	-1.42212
hp_mmu-mir-297a-4_x_st	CTGTGTGTATATGTATGTGTGCATGTGCATGTGTGTATATGAGTATACATATACATACACACATACCCATACAAGCATGCACACAAA	2.28827	2.65518	1.87504	1.22039	1.22039
hp_mmu-mir-297a-5_x_st	CTGTGTGTATATGTATGTGTGCATGTGCATGTGTGTATATGAGTATACATATACATACGCACATACCCATACAAGCATGCACACAAA	3.18221	3.1112	3.03286	1.04924	1.04924
hp_mmu-mir-297a-6_st	ATGTGCATGTGTGTATGTGCATGAGTGCATGTGCATGCATGTGTGTGCGCATGTATGTGTGCATGTGCATGTATGTGTGCAT	2.57785	2.78591	3.14995	0.818378	-1.22193
hp_mmu-mir-297a-6_x_st	ATGTGCATGTGTGTATGTGCATGAGTGCATGTGCATGCATGTGTGTGCGCATGTATGTGTGCATGTGCATGTATGTGTGCAT	2.16239	2.581	2.21657	0.975558	-1.02505
hp_mmu-mir-297b_x_st	TCTATTTGCTTGTGTGTATATGTATGTGTGCATGAACATGTGTATATGAATATACATATACATACACACATACCCATACAAACATGC	4.11902	4.26238	2.87876	1.43083	1.43083
hp_mmu-mir-297c_x_st	CTGTGTGTATATGTATGTGTGCATGTACATGTGTGTATATGAATATACATATACATACACACATACCCATACAAACATGCATACAAA	2.53735	12.6709	3.58907	0.706965	-1.4145
hp_mmu-mir-298_st	CCAGGCCTTTGGCAGAGGAGGGCTGTTCTTCCCTTGAGTTTTATGACTGGGAGGAACTAGCCTTCTCTCAGCTTAGGAGTGG	2.06758	3.99534	3.31046	0.624559	-1.60113
hp_mmu-mir-299_st	AAGAAATGGTTTACCGTCCCACATACATTTTGAGTATGTATGTGGGACGGTAAACCGCTTCTT	2.95537	3.42886	2.65518	1.11306	1.11306
hp_mmu-mir-299_x_st	AAGAAATGGTTTACCGTCCCACATACATTTTGAGTATGTATGTGGGACGGTAAACCGCTTCTT	4.76029	2.75318	2.65638	1.79202	1.79202
hp_mmu-mir-29a_st	ACCCCTTAGAGGATGACTGATTTCTTTTGGTGTTCAGAGTCAATAGAATTTTCTAGCACCATCTGAAATCGGTTATAATGATTGGGG	3.54644	2.28827	2.25726	1.57113	1.57113
hp_mmu-mir-29b-1_st	AGGAAGCTGGTTTCATATGGTGGTTTAGATTTAAATAGTGATTGTCTAGCACCATTTGAAATCAGTGTTCT	2.99486	3.03795	2.8703	1.0434	1.0434
hp_mmu-mir-29b-1_x_st	AGGAAGCTGGTTTCATATGGTGGTTTAGATTTAAATAGTGATTGTCTAGCACCATTTGAAATCAGTGTTCT	2.53522	2.00125	2.65518	0.95482	-1.04732
hp_mmu-mir-29b-2_st	CTTCTGGAAGCTGGTTTCACATGGTGGCTTAGATTTTTCCATCTTTGTATCTAGCACCATTTGAAATCAGTGTTTTAGGAG	2.68906	2.37323	3.22581	0.833607	-1.19961
hp_mmu-mir-29b-2_x_st	CTTCTGGAAGCTGGTTTCACATGGTGGCTTAGATTTTTCCATCTTTGTATCTAGCACCATTTGAAATCAGTGTTTTAGGAG	2.21593	1.97821	2.07889	1.06592	1.06592
hp_mmu-mir-29c_st	ATCTCTTACACAGGCTGACCGATTTCTCCTGGTGTTCAGAGTCTGTTTTTGTCTAGCACCATTTGAAATCGGTTATGATGTAGGGGG	2.14819	2.46135	2.35556	0.911965	-1.09653
hp_mmu-mir-300_st	GCTACTTGAAGAGAGGTTATCCTTTGTGTGTTTGCTTTACGCGAAATGAATATGCAAGGGCAAGCTCTCTTCGAGGAGC	2.74843	2.28827	2.15084	1.27784	1.27784
hp_mmu-mir-300_x_st	GCTACTTGAAGAGAGGTTATCCTTTGTGTGTTTGCTTTACGCGAAATGAATATGCAAGGGCAAGCTCTCTTCGAGGAGC	1.97184	2.64864	2.8794	0.684807	-1.46026
hp_mmu-mir-301a_st	CCTGCTAACGGCTGCTCTGACTTTATTGCACTACTGTACTTTACAGCGAGCAGTGCAATAGTATTGTCAAAGCATCCGCGAGCAGG	2.28827	2.14677	2.43826	0.938488	-1.06554
hp_mmu-mir-301a_x_st	CCTGCTAACGGCTGCTCTGACTTTATTGCACTACTGTACTTTACAGCGAGCAGTGCAATAGTATTGTCAAAGCATCCGCGAGCAGG	1.76623	2.53991	2.00461	0.881086	-1.13496
hp_mmu-mir-301b_st	TTTCCTGCTGGCTGCGGGTGCTCTGACTAGGTTGCACTACTGTGCTGTGAGAAGCAGTGCAATGGTATTGTCAAAGCATCTGGGACC	3.16391	2.58447	2.51072	1.26016	1.26016
hp_mmu-mir-302a_st	CCACCACTTAAACGTGGTTGTACTTGCTTTAGACCTAAGAAAGTAAGTGCTTCCATGTTTTGGTGATGG	2.48489	2.48489	2.36872	1.04904	1.04904
hp_mmu-mir-302a_x_st	CCACCACTTAAACGTGGTTGTACTTGCTTTAGACCTAAGAAAGTAAGTGCTTCCATGTTTTGGTGATGG	2.31718	2.28827	2.44044	0.949493	-1.05319
hp_mmu-mir-302b_st	GTTCCCTTCAACTTTAACATGGGAATGCTTTCTGTCTCATCGAAGAGTAAGTGCTTCCATGTTTTAGTAGAAGT	2.21218	2.39225	2.14677	1.03047	1.03047
hp_mmu-mir-302b_x_st	GTTCCCTTCAACTTTAACATGGGAATGCTTTCTGTCTCATCGAAGAGTAAGTGCTTCCATGTTTTAGTAGAAGT	2.5245	2.29088	2.59641	0.972304	-1.02848
hp_mmu-mir-302c_st	CCTCTGCTTTAACATGGGGTTACCTGCTGTGTTAAACAAAAGCAAGTGCTTCCATGTTTCAGTGGGGG	4.59916	2.20982	2.65638	1.73137	1.73137
hp_mmu-mir-302c_x_st	CCTCTGCTTTAACATGGGGTTACCTGCTGTGTTAAACAAAAGCAAGTGCTTCCATGTTTCAGTGGGGG	2.16826	2.41123	1.76567	1.22801	1.22801
hp_mmu-mir-302d_st	CCTTTACTTTAACATGGAGGCACTTGCTGTGCATTTAAAAATAAGTGCTTCCATGTTTGAGTGTGG	3.24458	3.37152	2.14677	1.51137	1.51137
hp_mmu-mir-3099_st	ATCGATCCCCATCCCAGCTTCCTTCCAGCCCTTGATGTTTTAGTACGCACATAGGCTAGAGAGAGGTTGGGGATGGGGAAAGAT	2.13881	3.33327	3.09016	0.692137	-1.4448
hp_mmu-mir-30a_st	GCGACTGTAAACATCCTCGACTGGAAGCTGTGAAGCCACAAATGGGCTTTCAGTCGGATGTTTGCAGCTGC	2.06038	2.34977	2.7824	0.740504	-1.35043
hp_mmu-mir-30a_x_st	GCGACTGTAAACATCCTCGACTGGAAGCTGTGAAGCCACAAATGGGCTTTCAGTCGGATGTTTGCAGCTGC	2.57785	2.58696	2.14677	1.2008	1.2008
hp_mmu-mir-30b_st	CTAAGCCAAGTTTCAGTTCATGTAAACATCCTACACTCAGCTGTCATACATGCGTTGGCTGGGATGTGGATGTTTACGTCAGCTGTC	2.83884	2.45855	2.94229	0.964839	-1.03644
hp_mmu-mir-30c-1_st	ACCATGTTGTAGTGTGTGTAAACATCCTACACTCTCAGCTGTGAGCTCAAGGTGGCTGGGAGAGGGTTGTTTACTCCTTCTGCCATG	2.7863	2.49047	2.33647	1.19253	1.19253
hp_mmu-mir-30c-1_x_st	ACCATGTTGTAGTGTGTGTAAACATCCTACACTCTCAGCTGTGAGCTCAAGGTGGCTGGGAGAGGGTTGTTTACTCCTTCTGCCATG	2.25304	2.19972	2.0574	1.09509	1.09509
hp_mmu-mir-30c-2_st	GAGTGACAGATATTGTAAACATCCTACACTCTCAGCTGTGAAAAGTAAGAAAGCTGGGAGAAGGCTGTTTACTCTCTCTGCCTT	2.67986	3.01532	2.44716	1.09509	1.09509
hp_mmu-mir-30c-2_x_st	GAGTGACAGATATTGTAAACATCCTACACTCTCAGCTGTGAAAAGTAAGAAAGCTGGGAGAAGGCTGTTTACTCTCTCTGCCTT	3.70936	3.36422	2.74451	1.35155	1.35155
hp_mmu-mir-30d_st	AAGTCTGTGTCTGTAAACATCCCCGACTGGAAGCTGTAAGCCACAGCCAAGCTTTCAGTCAGATGTTTGCTGCTACTGGCTC	2.57785	2.13635	2.65518	0.970877	-1.03
hp_mmu-mir-30e_st	GGGCAGTCTTTGCTACTGTAAACATCCTTGACTGGAAGCTGTAAGGTGTTGAGAGGAGCTTTCAGTCGGATGTTTACAGCGGCAGGC	2.14677	2.28419	2.26495	0.947823	-1.05505
hp_mmu-mir-30e_x_st	GGGCAGTCTTTGCTACTGTAAACATCCTTGACTGGAAGCTGTAAGGTGTTGAGAGGAGCTTTCAGTCGGATGTTTACAGCGGCAGGC	2.04788	2.47601	2.51298	0.81492	-1.22711
hp_mmu-mir-31_st	TGCTCCTGTAACTCGGAACTGGAGAGGAGGCAAGATGCTGGCATAGCTGTTGAACTGAGAACCTGCTATGCCAACATATTGCCATCT	2.53014	2.4114	2.14677	1.17858	1.17858
hp_mmu-mir-32_st	GGAGATATTGCACATTACTAAGTTGCATGTTGTCACGGCCTCAATGCAATTTAGTGTGTGTGATATTTTC	2.85789	2.77541	2.65437	1.07667	1.07667
hp_mmu-mir-320_st	GCCTCGCCGCCCTCCGCCTTCTCTTCCCGGTTCTTCCCGGAGTCGGGAAAAGCTGGGTTGAGAGGGCGAAAAAGGATGTGGG	3.83328	3.36877	3.87093	0.990274	-1.00982
hp_mmu-mir-322_st	CCTCGTTGACTCCGAAGGGCTGCAGCAGCAATTCATGTTTTGGAGTATTGCCAAGGTTCAAAACATGAAGCGCTGCAACACCCCTTC	2.20312	2.11591	2.33781	0.942386	-1.06114
hp_mmu-mir-323_st	TTGGTACTTGGAGAGAGGTGGTCCGTGGCGCGTTCGCTTCATTTATGGCGCACATTACACGGTCGACCTCTTTGCGGTATCTAATC	1.95316	2.40848	2.26732	0.861439	-1.16085
hp_mmu-mir-324_st	AACTGACTATGCCTCCTCGCATCCCCTAGGGCATTGGTGTAAAGCTGGAGACCCACTGCCCCAGGTGCTGCTGGGGGTTGTAGTCTG	4.43985	4.10972	5.54739	0.800348	-1.24946
hp_mmu-mir-325_st	ATATAGTGCTTGGTTCCTAGTAGGTGCTCAGTAAGTGTTTGTGACATAATTCGTTTATTGAGCACCTCCTATCAATCAAGCACTGTG	4.26933	2.48914	2.09895	2.03403	2.03403
hp_mmu-mir-326_st	CTCATCTGTCTGTTGGGCTGGGGGCAGGGCCTTTGTGAAGGCGGGTTATGCTCAGATCGCCTCTGGGCCCTTCCTCCAGTCCCGAGG	3.09384	3.20483	1.95973	1.57871	1.57871
hp_mmu-mir-327_st	TGCCCTTATAACTTGAGGGGCATGAGGATAGTCAGTAGTCCAACATCCCTCTTGATGGCACATTGCACA	2.85854	4.1371	4.1136	0.694901	-1.43905
hp_mmu-mir-328_st	CTGTCTCGGAGCCTGGGGCAGGGGGGCAGGAGGGGCTCAGGGAGAAAGTATCTACAGCCCCTGGCCCTCTCTGCCCTTCCGTCCCCT	2.64407	3.66517	3.16431	0.835592	-1.19676
hp_mmu-mir-329_st	TGTTCGCTTCTGGTACCGGAAGAGAGGTTTTCTGGGTCTCTGTTTCTTTGATGAGAATGAAACACACCCAGCTAACCTTTTTTTCAG	2.95367	3.69663	2.82641	1.04503	1.04503
hp_mmu-mir-33_st	CTGTGGTGCATTGTAGTTGCATTGCATGTTCTGGCAATACCTGTGCAATGTTTCCACAGTGCATCACGG	2.07706	2.08161	1.89566	1.09569	1.09569
hp_mmu-mir-330_st	GACCCTTTGGCGATCTCTGCCTCTCTGGGCCTGTGTCTTAGGCTCTTCAAGATCCAACGAGCAAAGCACAGGGCCTGCAGAGAGGTA	1.99831	2.11282	4.36515	0.457788	-2.18442
hp_mmu-mir-331_st	GAGTCTGGTTTTGTTTGGGTTTGTTCTAGGTATGGTCCCAGGGATCCCAGATCAAACCAGGCCCCTGGGCCTATCCTAGAACCAACC	2.08545	1.88414	2.42246	0.860884	-1.1616
hp_mmu-mir-335_st	TCTTTTGGGCGGGGGTCAAGAGCAATAACGAAAAATGTTTGTTTTTCGTAAACCGTTTTTCATTATTGCTCCTGACCCCCTCTCATG	2.35039	2.42187	2.60707	0.901544	-1.10921
hp_mmu-mir-337_st	CAGTGTAGTGAGAAGTTGGGGGGTGGGAACGGCGTCATGCAGGAGTTGATTGCACAGCCATTCAGCTCCTATATGATGCCTTTCTTC	2.70236	2.94131	3.88884	0.694901	-1.43905
hp_mmu-mir-338_st	CAACGCTGCACAGGCCGTCCTCCCCAACAATATCCTGGTGCTGAGTGGGTGCACAGTGACTCCAGCATCAGTGATTTTGTTGAAGAG	2.97927	2.32363	2.32453	1.28167	1.28167
hp_mmu-mir-339_st	ACGGGGTGGCCACTATCCCTGTCCTCCAGGAGCTCACGTATGCCTGCCTGTGAGCGCCTCGGCGACAGAGCCGGTGTCCACCCCTGC	2.12548	2.26591	2.16826	0.980269	-1.02013
hp_mmu-mir-340_st	CAATTGTACTTGGTGTGATTATAAAGCAATGAGACTGATTGTCATATGTCGTTTGTGGGATCCGTCTCAGTTACTTTATAGCCATAC	3.5362	1.83976	2.65518	1.33181	1.33181
hp_mmu-mir-341_st	AAAATGATGATGTCAGTTGGCCGGTCGGCCGATCGCTCGGTCTGTCAGTCAGTCGGTCGGTCGATCGGTCGGTCGGTCAGTCGGCTT	3.12934	3.421	2.98086	1.04981	1.04981
hp_mmu-mir-342_st	GAAAATGGGCTCAAGGTGAGGGGTGCTATCTGTGATTGAGGGACATGGTCAATGGAATTGTCTCACACAGAAATCGCACCCGTCACC	2.14053	2.06606	3.04267	0.703504	-1.42146
hp_mmu-mir-343_st	TGGGATAGAGTGGGTGTGGCGGGGGTAGCAGAGCCCAGGGCAACCTCTCCCTTCATGTGCCCAGATCCTGCATGC	2.45889	3.10078	2.76592	0.888997	-1.12486
hp_mmu-mir-344-1_s_st	CTGCAGCCAGGGTTTTTACCAGTCAGGCTCCTGGCTAGATTCCAGGTACCAGCTGGTACCTGATCTAGCCAAAGCCTGACTGTAAGC	3.23239	2.71976	3.09016	1.04603	1.04603
hp_mmu-mir-344-1_x_st	CTGCAGCCAGGGTTTTTACCAGTCAGGCTCCTGGCTAGATTCCAGGTACCAGCTGGTACCTGATCTAGCCAAAGCCTGACTGTAAGC	2.20844	2.81684	2.71176	0.814395	-1.22791
hp_mmu-mir-344-2_s_st	TTTTTACCAGTCAGGCTCCTGGCTAGATTCCAGGTACCAACTGGTACCTGATCTAGCCAAAGCCTGACTGTAAGCTGCAA	2.57785	2.5924	2.61641	0.985262	-1.01496
hp_mmu-mir-345_st	ACCCAAGTCCAGGCCTGCTGACCCCTAGTCCAGTGCTTGTGGTGGCTACTGGGCCCTGAACTAGGGGTCTGGAGACCTGGGTTTGAT	2.57682	2.29259	1.99364	1.29252	1.29252
hp_mmu-mir-346_st	TCTGTGTTGGGCGTCTGTCTGCCCGAGTGCCTGCCTCTCTGTTGCTCTGAAGGAGGCAGGGGCTGGGCCTGCAGCTGCCTGGGCAGA	2.94405	2.45879	2.2526	1.30696	1.30696
hp_mmu-mir-3470a_st	CCTGGACTCACTTTGTAGACCAGGCTGGCCTTAAATTCACAGAGATCAGCCTGCCTCTGCCTCCTGAGTGCTGGGAT	2.42925	2.50212	2.57562	0.94317	-1.06025
hp_mmu-mir-3470a_x_st	CCTGGACTCACTTTGTAGACCAGGCTGGCCTTAAATTCACAGAGATCAGCCTGCCTCTGCCTCCTGAGTGCTGGGAT	2.14677	2.28827	1.91434	1.12142	1.12142
hp_mmu-mir-3470b_st	GGATTCTCTGTGTAGCCTTGGCTGTCCTGGCACTCACTCTGTAGACCAGGCTGGCCTTGAACTCAAAAATTCACCTGCCTCTGCCTC	2.59555	2.79345	2.56589	1.01156	1.01156
hp_mmu-mir-3470b_x_st	GGATTCTCTGTGTAGCCTTGGCTGTCCTGGCACTCACTCTGTAGACCAGGCTGGCCTTGAACTCAAAAATTCACCTGCCTCTGCCTC	2.86404	3.06087	1.90315	1.50489	1.50489
hp_mmu-mir-3471-1_st	AAAGGAGCTTCAGTTGAGCCTCCATGAGATCCAACTGTAAGGCATTTCCTCAATTAGTGCTGTTATGCTGCTAGTGTATGCTCTGTC	2.40431	2.47547	2.63253	0.913306	-1.09492
hp_mmu-mir-3473_st	TGAGCCATCTCACCAGCCCAGAAAATATTTTTAAAAAGTGAATTGTCTTAAGCTGGAGAGATGGCTCAGCC	3.23954	3.06424	2.7515	1.17737	1.17737
hp_mmu-mir-3474_st	CCCTGGGAGGAGACGTGGATTCTTTAGAGTGCATCTGCGTCTTGTTCCAGGTTCAGCT	1.97915	1.93359	2.45173	0.807246	-1.23878
hp_mmu-mir-3475_st	CAAATCATGTACCCCCACAGAGGGTCCAGATGGTTCTTAGTTCTTCTGGAGGCACATGGTTTGAA	2.3672	1.91714	3.15992	0.749131	-1.33488
hp_mmu-mir-34a_st	CCAGCTGTGAGTAATTCTTTGGCAGTGTCTTAGCTGGTTGTTGTGAGTATTAGCTAAGGAAGCAATCAGCAAGTATACTGCCCTAGA	4.11525	1.85503	2.56392	1.60506	1.60506
hp_mmu-mir-34b_st	GTGCTCGGTTTGTAGGCAGTGTAATTAGCTGATTGTAGTGCGGTGCTGACAATCACTAACTCCACTGCCATCAAAACAAGGCAC	2.78582	3.09016	2.84765	0.978287	-1.02219
hp_mmu-mir-34c_st	AGTCTAGTTACTAGGCAGTGTAGTTAGCTGATTGCTAATAGTACCAATCACTAACCACACAGCCAGGTAAAAAGACT	3.11392	3.11392	2.99212	1.0407	1.0407
hp_mmu-mir-350_st	AGATGCCTTGCTCCTACAAGAGTAAAGTGCATGCGCTTTGGGACAGTGAGGAAAATAATGTTCACAAAGCCCATACACTTTCACCCT	2.70598	2.34827	3.28834	0.822901	-1.21521
hp_mmu-mir-351_st	CATGGCACCTCCGTTTCCCTGAGGAGCCCTTTGAGCCTGGAGTGAAAAAAAAAAACAGGTCAAGAGGCGCCTGGGAACTGGAGAAGA	2.23837	2.39073	2.57113	0.870581	-1.14866
hp_mmu-mir-361_st	GAAGCTTATCAGAATCTCCAGGGGTACTTAGTATTTGAAAAGTCCCCCAGGTGTGATTCTGATTTGTTTC	2.35612	2.4907	2.76972	0.850669	-1.17555
hp_mmu-mir-362_st	CTCGAATCCTTGGAACCTAGGTGTGAATGCTGCTTCAGTGCAACACACCTGTTCAAGGATTCAAA	2.84475	2.2102	1.9714	1.44301	1.44301
hp_mmu-mir-363_st	TGTTATCAGGTGGAACACGATGCAATTTTGGTTGGTGTAATAGGAGGAAAATTGCACGGTATCCATCTGTAAACC	3.06507	2.33874	2.08913	1.46715	1.46715
hp_mmu-mir-365-1_st	ACCGCAGGGAAAATGAGGGACTTTTGGGGGCAGATGTGTTTCCATTCCGCTATCATAATGCCCCTAAAAATCCTTATTGCTCTTGCA	2.93262	3.36422	2.98877	0.981214	-1.01915
hp_mmu-mir-365-1_x_st	ACCGCAGGGAAAATGAGGGACTTTTGGGGGCAGATGTGTTTCCATTCCGCTATCATAATGCCCCTAAAAATCCTTATTGCTCTTGCA	2.30054	2.56239	2.40394	0.956986	-1.04495
hp_mmu-mir-365-2_st	AGAGTGATCAAGGACAGCAAGAAAAATGAGGGACTTTCAGGGGCAGCTGTGTTTCCTGACTCAGTCATAATGCCCCTAAAAATCCTT	3.52846	4.08269	3.40258	1.037	1.037
hp_mmu-mir-367_st	AGGCCGTCACTGTTGCTAACATGCAACTCTGTTGAATAGAAATTGGAATTGCACTTTAGCAATGGTGATGGACCT	2.27633	2.27633	2.65487	0.857418	-1.16629
hp_mmu-mir-369_st	GGTACTTGAAGGGAGATCGACCGTGTTATATTCGCTTGGCTGACTTCGAATAATACATGGTTGATCTTTTCTCAGTATC	2.33642	2.05482	2.10494	1.10997	1.10997
hp_mmu-mir-370_st	AGACGGAGAGACCAGGTCACGTCTCTGCAGTTACACAGCTCATGAGTGCCTGCTGGGGTGGAACCTGGTTTGTCTGTCT	2.2728	2.42745	3.06924	0.740509	-1.35042
hp_mmu-mir-374_st	GAAGAAATCCTACTCGGGTGGATATAATACAACCTGCTAAGTGTTCTAGCACTTAGCAGGTTGTATTATCATTGTCCGAGGTTATGG	2.58567	2.11317	2.33479	1.10746	1.10746
hp_mmu-mir-374_x_st	GAAGAAATCCTACTCGGGTGGATATAATACAACCTGCTAAGTGTTCTAGCACTTAGCAGGTTGTATTATCATTGTCCGAGGTTATGG	2.28827	2.24409	2.46072	0.929921	-1.07536
hp_mmu-mir-375_st	CCCCGCGACGAGCCCCTCGCACAAACCGGACCTGAGCGTTTTGTTCGTTCGGCTCGCGTGAGGC	2.28585	2.66001	1.92443	1.1878	1.1878
hp_mmu-mir-376a_st	TAAAAGGTAGATTCTCCTTCTATGAGTACAATATTAATGACTAATCGTAGAGGAAAATCCACGTTTTC	2.06178	2.40407	2.2804	0.904129	-1.10604
hp_mmu-mir-376b_st	TGGTATTTAAAAGGTGGATATTCCTTCTATGGTTACGTGCTTCCTGGATAATCATAGAGGAACATCCACTTTTTCAGTATCA	1.86386	2.34876	2.60494	0.715509	-1.39761
hp_mmu-mir-376b_x_st	TGGTATTTAAAAGGTGGATATTCCTTCTATGGTTACGTGCTTCCTGGATAATCATAGAGGAACATCCACTTTTTCAGTATCA	2.32273	2.32273	2.13425	1.08831	1.08831
hp_mmu-mir-376c_st	TTTGGTATTTAAAAGGTGGATATTCCTTCTATGTTTATGCTTTTTGTGATTAAACATAGAGGAAATTTCACGTTTTCAGTGTCAAA	2.68749	2.76811	3.06613	0.876509	-1.14089
hp_mmu-mir-376c_x_st	TTTGGTATTTAAAAGGTGGATATTCCTTCTATGTTTATGCTTTTTGTGATTAAACATAGAGGAAATTTCACGTTTTCAGTGTCAAA	2.59568	2.35891	2.06822	1.25503	1.25503
hp_mmu-mir-377_st	TGAGCAGAGGTTGCCCTTGGTGAATTCGCTTTATTGATGTTGAATCACACAAAGGCAACTTTTGTTTG	2.99036	2.14034	2.2931	1.30407	1.30407
hp_mmu-mir-378_st	AGGGCTCCTGACTCCAGGTCCTGTGTGTTACCTCGAAATAGCACTGGACTTGGAGTCAGAAGGCCT	2.76203	1.95945	2.19807	1.25657	1.25657
hp_mmu-mir-379_st	AGAGATGGTAGACTATGGAACGTAGGCGTTATGTTTTTGACCTATGTAACATGGTCCACTAACTCT	2.17854	3.27222	2.17854	1	1
hp_mmu-mir-380_st	AAGATGGTTGACCATAGAACATGCGCTACTTCTGTGTCGTATGTAGTATGGTCCACATCTT	2.23823	2.47063	2.44365	0.915937	-1.09178
hp_mmu-mir-381_st	TACTTAAAGCGAGGTTGCCCTTTGTATATTCGGTTTATTGACATGGAATATACAAGGGCAAGCTCTCTGTGAGTA	3.27043	2.42513	2.04067	1.60263	1.60263
hp_mmu-mir-381_x_st	TACTTAAAGCGAGGTTGCCCTTTGTATATTCGGTTTATTGACATGGAATATACAAGGGCAAGCTCTCTGTGAGTA	2.40084	2.10207	2.58213	0.929792	-1.07551
hp_mmu-mir-382_st	TACTTGAAGAGAAGTTGTTCGTGGTGGATTCGCTTTACTTGTGACGAATCATTCACGGACAACACTTTTTTCAGTA	3.06297	4.24146	3.15094	0.972082	-1.02872
hp_mmu-mir-383_st	CTCAGATCAGAAGGTGACTGTGGCTTTGGGTGGATATTAATCAGCCACAGCACTGCCTGGTCAGAAAGAG	2.61823	3.91882	2.26495	1.15597	1.15597
hp_mmu-mir-384_st	TGTTAAATCAGGAATTGTAAACAATTCCTAGGCAATGTGTATAATGTTGGTAAGTCATTCCTAGAAATTGTTCACAATGCCTGTAAC	2.27841	2.09564	2.69708	0.84477	-1.18375
hp_mmu-mir-409_st	TGGTACTCGGAGAGAGGTTACCCGAGCAACTTTGCATCTGGAGGACGAATGTTGCTCGGTGAACCCCTTTTCGGTATCA	2.31871	2.09047	2.21879	1.04503	1.04503
hp_mmu-mir-410_st	GGGTACTTGAGGAGAGGTTGTCTGTGATGAGTTCGCTTTATTAATGACGAATATAACACAGATGGCCTGTTTTCAATACCA	2.50576	2.65518	3.29923	0.759499	-1.31666
hp_mmu-mir-411_st	TGGTACTTGGAGAGATAGTAGACCGTATAGCGTACGCTTTATCTGTGACGTATGTAACACGGTCCACTAACCCTCAGTATCA	1.93062	2.33137	2.29223	0.842247	-1.1873
hp_mmu-mir-412_st	GGGTATGGGACGGATGGTCGACCAGCTGGAAAGTAATTGTTTCTAATGTACTTCACCTGGTCCACTAGCCGTCGGTGCCC	2.27467	2.63774	2.72673	0.834214	-1.19873
hp_mmu-mir-421_st	CATTGTAGGCCTCATTAAATGTTTGTTGAATGAAAAAATGAATCATCAACAGACATTAATTGGGCGCCTGCTCTGT	3.08395	2.50359	2.89431	1.06552	1.06552
hp_mmu-mir-423_st	ACTTGTGAGGAAATAAAGGAAGTTAGGCTGAGGGGCAGAGAGCGAGACTTTTCTATTTTCCAAAAGCTCGGTCTGAGGCCCCTCAGT	2.05258	2.34038	1.86908	1.09818	1.09818
hp_mmu-mir-425_st	AAAGTGCTTTGGAATGACACGATCACTCCCGTTGAGTGGGCACCCAAGAAGCCATCGGGAATGTCGTGTCCGCCCAGTGCTCTTT	2.31391	2.65297	2.71353	0.852729	-1.1727
hp_mmu-mir-429_st	CCTGCTGATGGATGTCTTACCAGACATGGTTAGATCTGGATGCATCTGTCTAATACTGTCTGGTAATGCCGTCCATCCACGGC	2.57785	2.08256	2.15254	1.19759	1.19759
hp_mmu-mir-431_st	CGTCCTGCGAGGTGTCTTGCAGGCCGTCATGCAGGCCACACTGACGGTAACGTTGCAGGTCGTCTTGCAGGGCTTCTCGCAAGACGA	2.41628	2.55661	3.32416	0.726885	-1.37573
hp_mmu-mir-432_st	TGGGTAGCTCTTGCATTTCCTGGTGGGGGCCACTGGATGGCTCCTCCACTTCTTGGAGTAGATCAGTGGGCAGCT	2.45767	2.26916	2.28658	1.07482	1.07482
hp_mmu-mir-433_st	TGCCCGGGGAGAAGTACGGTGAGCCTGTCATTATTCAGAGAGGCTAGATCCTCTGTGTTGAGAAGGATCATGATGGGCTCCTCGGTG	2.8695	2.38965	2.57541	1.11419	1.11419
hp_mmu-mir-434_st	TCGACTCTGGGTTTGAACCAAAGCTCGACTCATGGTTTGAACCATTACTTAATTCGTGGTTTGAACCATCACTCGACTCCTGGTTCG	2.29995	2.15741	2.24769	1.02325	1.02325
hp_mmu-mir-448_st	ACGAGGAGGTTGAACATCCTGCATAGTGCTGCCAGGAAATCCCTACTTCATACTAAGAGGGGGCTGGCTGGTTGCATATGTAGGATG	3.54462	2.46135	1.85479	1.91107	1.91107
hp_mmu-mir-449a_st	CTGTGTGTGATGGCTTGGCAGTGTATTGTTAGCTGGTTGAGTATGTGAGCGGCACCAGCTAACATGCGACTGCTCTCCTATTGCACA	2.75322	2.85098	2.34065	1.17626	1.17626
hp_mmu-mir-449b_st	AGACTCGGGTAGGCAGTGTTGTTAGCTGGCTGCGTTGGGTCAGGCCAGCAGCCACAGCTACCCTGCCACTTCCTTCTGGC	2.22197	5.35913	2.98384	0.744668	-1.34288
hp_mmu-mir-449c_st	AGGATGAAGTGTGGGTGTGTCAGGCAGGCAGTGCATTGCTAGCTGGCTGTTAGAACTTTATCCCAACAGTTGCTAGCTGCACTACCC	2.94662	3.18446	2.65518	1.10976	1.10976
hp_mmu-mir-450a-1_st	GAGAGATACTGAGCTGTTTTTGCGATGTGTTCCTAATATGTGCTATAATTATATTGGGAACATTTTGCATAAATAGCTTTGTGTCAA	2.52047	2.72391	2.20844	1.14129	1.14129
hp_mmu-mir-450a-1_x_st	GAGAGATACTGAGCTGTTTTTGCGATGTGTTCCTAATATGTGCTATAATTATATTGGGAACATTTTGCATAAATAGCTTTGTGTCAA	2.02542	2.69542	2.35659	0.85947	-1.16351
hp_mmu-mir-450a-2_st	GAACTATTTTTGCGATGTGTTCCTAATATGTACTATGAGTATATTGGGGATGCTTTGCATTCATGGTTC	2.52421	2.43858	2.7165	0.929212	-1.07618
hp_mmu-mir-450a-2_x_st	GAACTATTTTTGCGATGTGTTCCTAATATGTACTATGAGTATATTGGGGATGCTTTGCATTCATGGTTC	2.48883	2.77156	2.58377	0.963255	-1.03815
hp_mmu-mir-450b_st	GATACAGAATTATTTTTGCAGTATGTTCCTGAATACATAACATAAGCGTATTGGGAACATTTTGCATGCATAATTTTGTATC	2.44752	2.14313	2.50893	0.975524	-1.02509
hp_mmu-mir-451_st	CTTGGGAATGGCGAGGAAACCGTTACCATTACTGAGTTTAGTAATGGTAACGGTTCTCTTGCTGCTCCCACA	2.77853	2.64557	2.69845	1.02968	1.02968
hp_mmu-mir-451_x_st	CTTGGGAATGGCGAGGAAACCGTTACCATTACTGAGTTTAGTAATGGTAACGGTTCTCTTGCTGCTCCCACA	2.65305	2.00854	1.86912	1.41941	1.41941
hp_mmu-mir-452_st	GCTAAGCAGTTACAACTGTTTGCAGAGGAAACTGAGACTTTATAACTATGTCTCAGTCTCATCTGCAAAGAGGTAAGTGCTTTGC	2.63772	2.43608	3.24024	0.81405	-1.22843
hp_mmu-mir-453_st	AGAAGATGCAGGAGTGCTGTGAGAAGTGCCATCCCCTGGTACTTGGAGGGAGGTTGCCTCATAGTGAGCTTGCATTATTTAA	2.71415	2.29552	2.63593	1.02968	1.02968
hp_mmu-mir-455_st	CTCCCTGGTGTGAGCGTATGTGCCTTTGGACTACATCGTGAACGCAGCACCATGCAGTCCACGGGCATATACACTTGCCTCA	2.54185	2.72886	2.78721	0.911971	-1.09653
hp_mmu-mir-463_st	CTTTACCTAATTTGTTGTCCATCATGTAAAACATAAATGATGATAGACACCATATAAGGTAGAGGAAGGTTCACT	2.75028	2.30644	2.67193	1.02933	1.02933
hp_mmu-mir-464_st	ACCTTGTTATGGGGGTCTGGGGTAAGGAGTGGTCATCAGGGGGTACTACCAAGTTTATTCTGTGAGATAGA	2.31784	2.46135	2.77389	0.835592	-1.19676
hp_mmu-mir-465a_s_st	GCCCTATTTAGAATGGCACTGATGTGATAAAATAAAAAATTGATCAGGGCCTTTCTAAGTAGAGTAAGGCTTAC	2.2032	2.04079	1.8451	1.19408	1.19408
hp_mmu-mir-465a_st	GCCCTATTTAGAATGGCACTGATGTGATAAAATAAAAAATTGATCAGGGCCTTTCTAAGTAGAGTAAGGCTTAC	3.67652	4.05724	3.09016	1.18975	1.18975
hp_mmu-mir-465a_x_st	GCCCTATTTAGAATGGCACTGATGTGATAAAATAAAAAATTGATCAGGGCCTTTCTAAGTAGAGTAAGGCTTAC	2.76657	3.19813	2.16073	1.28039	1.28039
hp_mmu-mir-465b-1_s_st	TGCAATGCCCTATTTAGAATGGTGCTGATCTGATGAAATAAAAAATTGATCAGGGCCTTTCTAAGTAGAGTAAGGCTTA	2.50108	1.92301	2.31102	1.08224	1.08224
hp_mmu-mir-465b-1_x_st	TGCAATGCCCTATTTAGAATGGTGCTGATCTGATGAAATAAAAAATTGATCAGGGCCTTTCTAAGTAGAGTAAGGCTTA	2.08959	2.19206	3.66042	0.57086	-1.75174
hp_mmu-mir-465b-2_s_st	TGCAATGCCCTATTTAGAATGGTGCTGATCTGATGAAATAAAAAATTGATCAGGGCCTTTCTAAGTAGAGTAAGGCTTA	2.78591	2.41865	3.55939	0.782694	-1.27764
hp_mmu-mir-465b-2_x_st	TGCAATGCCCTATTTAGAATGGTGCTGATCTGATGAAATAAAAAATTGATCAGGGCCTTTCTAAGTAGAGTAAGGCTTA	2.14677	3.09016	2.95056	0.727581	-1.37442
hp_mmu-mir-465c-1_s_st	TGCAATGCCCTATTTAGAATGGCGCTGATCTGATGAATAAAAAAAAAATGATCAGGGCCTTTCTAAGTAGAGTAAGGCTTA	143.551	119.677	89.5096	1.60375	1.60375
hp_mmu-mir-465c-2_s_st	TGCAATGCCCTATTTAGAATGGCGCTGATCTGATGAATAAAAAAAAAATGATCAGGGCCTTTCTAAGTAGAGTAAGGCTTA	129.662	116.646	84.4631	1.53513	1.53513
hp_mmu-mir-466a_x_st	TATATGTGTTTATGTGTGTGTACATGTACATATGTGAATATGATATCCATATACATACACGCACACATAAGAC	2.803	3.68512	2.68222	1.04503	1.04503
hp_mmu-mir-466b-1_x_st	TGTATGTGTTGATGTGTGTGTACATGTACATGTGTGAATATGATATACATATACATACACGCACACATAAGACACATATGAG	2.53531	5.33808	2.97609	0.851891	-1.17386
hp_mmu-mir-466b-2_x_st	TGTATGTGTTGATGTGTGTGTACATGTACATGTCTGAATATGATATACATATACATACACGCACACATAAGACACATATGAG	2.45537	3.02581	2.28059	1.07664	1.07664
hp_mmu-mir-466b-3_x_st	TATATGTGTTGATGTGTGTGTACATGTACATGTGTGAATATGATATACAAATACATACACGCACACATAAGACACATATGA	2.43392	2.43868	2.69445	0.903308	-1.10704
hp_mmu-mir-466c_x_st	GTATATGTGTTGATGTGTGTGTGCATGTACATATGTGAATATGATATACATATACATACACGCACACATAAGACACATATGAGC	2.62936	3.72407	2.34374	1.12187	1.12187
hp_mmu-mir-466d_x_st	CATGTGTGTTTGTGTGTGCGTACATGTACATGTGTGTATATGAATATACATATACATACACGCACACATAGATACGCACGCACACAC	3.09805	2.44531	2.1634	1.43203	1.43203
hp_mmu-mir-466e_x_st	GTGTATGTGTTGATGTGTGTGTACATGTACATATGTGAATATGATATACATATACATACACGCACACATAAGACACATATGAGC	2.301	2.33186	2.63255	0.874057	-1.14409
hp_mmu-mir-466f-1_x_st	CATGTGTGTTTACGTGTGTGTGCATGTGCATGTGTGTATATGAATATACATACACATACACACACACATACACACACATGCAACACA	2.15411	3.91103	2.67775	0.804447	-1.24309
hp_mmu-mir-466f-2_x_st	AATGTGTGTTTACGTGTGTGTGCATGTGCATGTGTGTATATGAATATATGTATACATACACACACACATACACACTCATGTAACACA	2.33462	2.74708	2.56509	0.910152	-1.09872
hp_mmu-mir-466f-3_x_st	CATGTGTGTTTACGTGTGTGTGCATGTGCATGTGTGTATATGAATATATGTATACATACACACACACATACACACGCACGCAACACA	2.57785	4.76244	2.77145	0.930147	-1.0751
hp_mmu-mir-466f-4_st	CATCTGCATCTGTGTGTCTACGTGTGTGTGCATGTGCATGTGTGTGTATCTGTATGTGAGTGTGTGCATGCATGTGTGTGCATCTAT	2.10653	4.76244	2.14677	0.981255	-1.0191
hp_mmu-mir-466f-4_x_st	CATCTGCATCTGTGTGTCTACGTGTGTGTGCATGTGCATGTGTGTGTATCTGTATGTGAGTGTGTGCATGCATGTGTGTGCATCTAT	2.19366	5.4896	2.39418	0.916248	-1.09141
hp_mmu-mir-466g_st	TGTGTTTTCGTGTGTGTGCATGTGGATGTATGTATATGATTTTGCATATACAGACACATGCACACACATGCGGCACACAC	2.35612	2.23383	2.25458	1.04503	1.04503
hp_mmu-mir-466g_x_st	TGTGTTTTCGTGTGTGTGCATGTGGATGTATGTATATGATTTTGCATATACAGACACATGCACACACATGCGGCACACAC	2.07922	4.23717	2.51678	0.826141	-1.21045
hp_mmu-mir-466h_st	TGTATATTTGTGTGTGCATGTGCTTGTGTGTATGTGAATATATATATCATACGCACGCACACACACACACAAATGCAAGCA	2.23241	2.82662	3.3828	0.659928	-1.51532
hp_mmu-mir-466h_x_st	TGTATATTTGTGTGTGCATGTGCTTGTGTGTATGTGAATATATATATCATACGCACGCACACACACACACAAATGCAAGCA	2.22842	3.45367	2.72788	0.816905	-1.22413
hp_mmu-mir-466i_st	AGAGATCATGTCAGTGAACTGCCACATTTTTGATATATATTATGTATGTATGTGTGTGTGTGTGTGTGTGTGTATATATATACACAC	2.89371	2.07802	2.26874	1.27547	1.27547
hp_mmu-mir-466j_st	GTGTGTGTGTGTGTGCATTCGTGTGTTTGTGCATGTGTGTATGTGTGCACATTTATGTGTGTGCATGTGTATGTATGTGTGTGTGCA	1.84508	2.38692	1.97342	0.934969	-1.06955
hp_mmu-mir-466j_x_st	GTGTGTGTGTGTGTGCATTCGTGTGTTTGTGCATGTGTGTATGTGTGCACATTTATGTGTGTGCATGTGTATGTATGTGTGTGTGCA	2.15917	5.26236	2.27751	0.94804	-1.05481
hp_mmu-mir-466k_st	ATATATGTGTGTGTGTGTGTGTGTGTGTACATGTACATGTGAGTATGTGTGTGTATATGTTTGTACATGTGCATGTGTGTGAGTATG	2.66003	3.79947	3.18497	0.835181	-1.19735
hp_mmu-mir-466k_x_st	ATATATGTGTGTGTGTGTGTGTGTGTGTACATGTACATGTGAGTATGTGTGTGTATATGTTTGTACATGTGCATGTGTGTGAGTATG	1.96994	6.80804	2.46818	0.798132	-1.25292
hp_mmu-mir-466l_st	CTATGTATGTGCATGTGTGTTTGTGTGTACATGTACATGTATATATATATTGATATACATATAAATACATGCACACATATTCATGCA	2.14677	2.32706	2.19724	0.977034	-1.02351
hp_mmu-mir-467a-1_x_st	CTGTGTGCGTAAGTGCCTGCATGTATATGCGTGTATATTTTATGCATATACATACACACACCTACACACACAT	2.06147	2.46135	2.49884	0.824968	-1.21217
hp_mmu-mir-467b_x_st	CCGTGTGCGTAAGTGCCTGCATGTATATGCGTGTATATTTTATGCATATACATACACACACCAACACACACAT	2.14677	2.1498	2.35514	0.911529	-1.09706
hp_mmu-mir-467c_x_st	CCTTTGTGCATAAGTGCGTGCATGTATATGTGTGTATATTTTATGCATATACATACACACACCTATACACACATGCACACAGACATG	2.65934	3.36715	2.37688	1.11884	1.11884
hp_mmu-mir-467d_x_st	CCTGTGTGCATAAGTGCGCGCATGTATATGCGTGTATATTTTATGCATATACATACACACACCTACACACACATGCACACAGACA	2.29356	2.14067	2.74295	0.836165	-1.19594
hp_mmu-mir-467e_x_st	GCCTGTGTGCATAAGTGTGAGCATGTATATGTGTGTATATTTTATGCATATACATACACACACCTATATACACATGCACACAGACAT	1.98281	3.51855	2.25751	0.87832	-1.13854
hp_mmu-mir-467f_st	ACGGCTACATAGAGAAATCCTGTACCCAGAAATCGAACGGGGGTGGGTGTGTGTGTAGGTGTGTGTGTGTGTATGTATGTATATACA	1.78125	2.52286	2.14677	0.829736	-1.2052
hp_mmu-mir-467h_st	TTTTCACTTTTGTTTTTCTCATGTATATGTGTATGTGTGCGGTGTACATAATTATATCTATGTGTGCATGTATGTGGACATAAGTGT	2.54693	2.65433	2.35326	1.0823	1.0823
hp_mmu-mir-467h_x_st	TTTTCACTTTTGTTTTTCTCATGTATATGTGTATGTGTGCGGTGTACATAATTATATCTATGTGTGCATGTATGTGGACATAAGTGT	2.74741	3.34084	2.1802	1.26016	1.26016
hp_mmu-mir-468_st	ATAAGAAACTTGGCGTGTCGTGACTGATGTACTGATAAGAAACTCAGTGTGATATGACTGATGTGCGTGTGTCTGTCT	2.14677	2.28827	2.22226	0.96603	-1.03516
hp_mmu-mir-469_st	CGCGGTGCCTCTTTCATTGATCTTGGTGTCCTCAAATTGAAAGCCAAGGAAGAGGTGGGGGGCGTGGTAGCCTT	3.33159	2.66268	2.49431	1.33568	1.33568
hp_mmu-mir-470_st	CAGTGCTCTTCTTGGACTGGCACTGGTGAGTTAAACTAAATACAACCAGTACCTTTCTGAGAAGAGTAAAGCTCA	2.69903	2.95142	2.40441	1.12253	1.12253
hp_mmu-mir-471_st	GTGCTTTACGTAGTATAGTGCTTTTCACATTAAACAAAAAGTGAAAGGTGCCATACTATGTATAGGA	2.38738	2.61609	2.09319	1.14055	1.14055
hp_mmu-mir-483_st	GAGGGGGAAGACGGGAGAAGAGAAGGGAGTGGTTTTTGGGTGCCTCACTCCTCCCCTCCCGTCTTGTTCTCTC	3.21868	5.60494	4.0999	0.785063	-1.27378
hp_mmu-mir-484_st	CTCGTCAGGCTCAGTCCCCTCCCGATAAACCTCAAAATAGGGTCTTACCTAGGGGGCTGGCGGCGTA	3.34427	2.68085	3.11407	1.07392	1.07392
hp_mmu-mir-485_st	ACTTGGAGAGAGGCTGGCCGTGATGAATTCGATTCATCTAAACGAGTCATACACGGCTCTCCTCTCTTCTAGT	2.35257	2.56495	3.00147	0.783807	-1.27582
hp_mmu-mir-486_st	CAGCCAGCTCTGATCTCGCCCTCCCTGAGGGGTCCTGTACTGAGCTGCCCCGAGGTCCTTCACTGTGCTCAGCTCGGGGCAGCTCAG	2.86565	2.75844	2.51488	1.13948	1.13948
hp_mmu-mir-486_x_st	CAGCCAGCTCTGATCTCGCCCTCCCTGAGGGGTCCTGTACTGAGCTGCCCCGAGGTCCTTCACTGTGCTCAGCTCGGGGCAGCTCAG	2.61939	2.09687	3.0213	0.866974	-1.15344
hp_mmu-mir-487b_st	TGGTACTTGGAGAGTGGTTATCCCTGTCCTCTTCGCTTCACTCATGCCGAATCGTACAGGGTCATCCACTTTTTCAGTATCA	2.55379	2.8306	3.75086	0.680855	-1.46874
hp_mmu-mir-488_st	TTCGGGTGAGAGTGAGAATCCTCTCTCCCAGATAATAGCACTCTCAAACAAGTTTCCATGTTGTTTGAAAGGCTGTTTCTTGGTCAG	2.14677	2.01527	2.65518	0.808523	-1.23682
hp_mmu-mir-489_st	ACTGCTGCAGTGGCAGCTTGGTTGTCATATGTGTGATGACACTTTCTAAAGTCTTCCAGAATGACACCACATATATGGCAGCTAAAC	1.90519	2.2164	2.28006	0.835588	-1.19676
hp_mmu-mir-490_st	TGGAAAGTTCATTGTTCGACACCATGGATCTCCAGGTGGGTCACGTTTAGATATACACCAACCTGGAGGACTCCATGCTGTTGA	2.01047	2.65518	2.44392	0.822638	-1.2156
hp_mmu-mir-491_st	AATTGACTTAGCTGGGAAGTGGGGAACCCTTCCATGAGGAGTAGAACACTCCTTATGCAAGATTCCCTTCTACCTGACTGAGTTGA	2.78329	2.27091	2.6203	1.0622	1.0622
hp_mmu-mir-493_st	CGCCAGGGCCTTGTACATGGTAGGCTTTCATTCATTTTTTGCACATTCGGTGAAGGTCCTACTGTGTGCCAGGCCCTGTGCCA	2.29431	2.39287	2.28056	1.00603	1.00603
hp_mmu-mir-494_st	TTGATACTTGAAGGAGAGGTTGTCCGTGTTGTCTTCTCTTTATTTATGATGAAACATACACGGGAAACCTCTTTTTTAGTATCAA	2.92178	2.9316	2.1825	1.33873	1.33873
hp_mmu-mir-495_st	AAAGAAGTTGCCCATGTTATTTTTCGCTTTTATTTGTGACGAAACAAACATGGTGCACTTCTT	3.13273	2.52599	3.45314	0.907211	-1.10228
hp_mmu-mir-495_x_st	AAAGAAGTTGCCCATGTTATTTTTCGCTTTTATTTGTGACGAAACAAACATGGTGCACTTCTT	2.40306	2.3408	2.44928	0.981126	-1.01924
hp_mmu-mir-496_st	AGTGTTCGAATGGAGGTTGCCCATGGTGTGTTCATTTTATTTATGATGAGTATTACATGGCCAATCTCCTTTCGGCACT	4.61698	2.57796	2.60099	1.77509	1.77509
hp_mmu-mir-497_st	CCTGCCCCCGCCCCAGCAGCACACTGTGGTTTGTACGGCACTGTGGCCACGTCCAAACCACACTGTGGTGTTAGAGCGAGGGTA	4.12833	1.84508	3.76983	1.0951	1.0951
hp_mmu-mir-499_st	GGGTGGGCAGCTGTTAAGACTTGCAGTGATGTTTAGCTCCTCTGCATGTGAACATCACAGCAAGTCTGTGCTGCTGCCT	1.98578	2.30903	2.85842	0.694712	-1.43945
hp_mmu-mir-500_st	CTCCTCTGCTCCCCCTCTCTAATCCTTGCTATCTGGGTGCTTAGTGCTATCTCAATGCAATGCACCTGGGCAAGGGTTCAGAGAAGG	2.28985	2.28985	2.08795	1.09669	1.09669
hp_mmu-mir-501_st	CTTCTGCTCTGCTCATCCTCTCTAATCCTTTGTCCCTGGGTGAAAATGCTATTTGTATGCAATGCACCCGGGCAAGGATTTGGGGAA	2.31028	2.11679	2.64469	0.873555	-1.14475
hp_mmu-mir-503_st	TGCCCTAGCAGCGGGAACAGTACTGCAGTGAGTGTTTGGTGCCCTGGAGTATTGTTTCCACTGCCTGGGTA	2.57785	2.34808	2.65518	0.970877	-1.03
hp_mmu-mir-504_st	TCCTGTTGGGAGACCCTGGTCTGCACTCTATCTGTAAACTTACTGAAGGGAGAGCAGGGCAGGGTTTCCCATACAGAGG	3.33503	4.69319	3.01588	1.10582	1.10582
hp_mmu-mir-505_st	AAATTGATGCACCCAGTGGGGGAGCCAGGAAGTATTGATGTTTCTGCCAGGTTAGCGTCAACACTTGCTGGTTTTCTCTCTGGAGTA	2.78591	2.93132	3.06781	0.908111	-1.10119
hp_mmu-mir-509_st	GTGGTTCTTTACTCCAGAATGTGGCAATCATGCATAATTAAATGTGATTGACATTTCTGTAATGGAGTAACACAT	2.09361	2.73225	3.1318	0.6685	-1.49589
hp_mmu-mir-511_st	GATACCCACCATGCCTTTTGCTCTGCACTCAGTAAATAATAATTTGTGAATGTGTAGCAAAAGACAGGATGGGGATCCA	2.35455	2.1261	2.35399	1.00024	1.00024
hp_mmu-mir-532_st	CAGATTTGCTTTTTCTCTTCCATGCCTTGAGTGTAGGACCGTTGACATCTTAATTACCCTCCCACACCCAAGGCTTGCAGGAGAGCA	2.28827	1.87968	2.60041	0.879966	-1.13641
hp_mmu-mir-539_st	TACTTGAGGAGAAATTATCCTTGGTGTGTTGGCTCTTTTGGATGAATCATACAAGGATAATTTCTTTTTGAGTA	2.97971	2.31508	2.73316	1.09021	1.09021
hp_mmu-mir-540_st	TGGGCCAAGGGTCACCCTCTGACTCTGTGGCCAAGGGTAGACAGGTCAGAGGTCGATCCTGGGCCTA	2.87974	2.09554	2.01327	1.43038	1.43038
hp_mmu-mir-541_st	GCCAAAATCAGAGAAGGGATTCTGATGTTGGTCACACTCCAAGAGTTTTAAAATGAGTGGCGAACACAGAATCCATACTCTGCTTAT	2.82745	2.5204	4.44826	0.63563	-1.57324
hp_mmu-mir-542_st	GGATCTCAGACGTCTCGGGGATCATCATGTCACGAGATACCACTGTGCCCTTGTGACAGATTGATAACTGAAAGGTCTGGGAGCC	2.42094	2.69594	2.65518	0.911781	-1.09675
hp_mmu-mir-543_st	TGCTTAATGAGAAGTTGCCCGCGTGTTTTTCGCTTTATATGTGACGAAACATTCGCGGTGCACTTCTTTTTCAGCA	2.54161	2.46135	2.40707	1.05589	1.05589
hp_mmu-mir-544_st	CACCTAGGGATCTTGTTAAAAAGCAGAGTCTGATTGAGGGGCCAAGATTCTGCATTTTTAGCAAGCTCTCAAGTGATG	4.20907	1.99184	2.41667	1.74168	1.74168
hp_mmu-mir-546_st	CCTCTCTTCCCAAAACTAAACAGGATCTATCATGGTGGCACGGAGTCAGCTAGATGTTGTCTCTTGCTATCCCTGTGCTAGTTCCAT	2.01384	2.71891	2.53777	0.793548	-1.26016
hp_mmu-mir-547_st	GTGTGATGTATCACTTGAGGATGTACCACCCATTTAACAGGAAACATGCTTGGTACATCTTTGAGTGAGATAACACAC	2.49727	2.16484	2.18615	1.14231	1.14231
hp_mmu-mir-551b_st	GTGCTCTTGTGGCCCATGAAATCAAGCTTGGGTGAGACCTGGTGCAGAACAGGAAGGCGACCCATACTTGGTTTCAGTGGCTGCAAG	2.47385	1.98186	2.01254	1.22922	1.22922
hp_mmu-mir-568_st	ACACTATATTATGTATAAATGTATACACACTTCTATATATGTCCACATATATGCGGTGTGTGTATTATACAGGTATAGGTGTG	2.6352	2.66071	1.83731	1.43427	1.43427
hp_mmu-mir-574_st	TGCGGGCGTGTGAGTGTGTGTGTGTGAGTGTGTGTCGCTCCAAGTCCACGCTCATGCACACACCCACACGCCCGCACG	2.70557	3.83089	4.51257	0.599562	-1.66789
hp_mmu-mir-582_st	ACTCTTTGGATACAGTTGTTCAACCAGTTACTAATCTAACTAATTGTAACCTGTTGAACAACTGAACCCAAAGGGTGCAAA	2.56525	2.14677	2.46796	1.03942	1.03942
hp_mmu-mir-590_st	AGTCAGAAATGAGCTTATTCATAAAAGTGCAGTATGGTGAAGTCAATCTGTAATTTTATGTATAAGCTAGTCTCTGATTGA	2.28827	2.35171	2.30923	0.990927	-1.00916
hp_mmu-mir-592_st	TGATATTATGCCATGACATTGTGTCAATATGCGATGATGTGTTGTGATGGCACAGCGTCATCACGTGGTGACGCAACATCATGACGT	2.6189	2.50858	2.54342	1.02968	1.02968
hp_mmu-mir-598_st	GCTGATGCTGGCGGTGATGCCGATGGTGCGAGCTGAAAATGGGCTGCTACGTCATCGTCGTCATCGTTATCATCATCAT	3.527	2.63244	2.6698	1.32107	1.32107
hp_mmu-mir-599_st	TGCTGTCCACAGTGTATTTGATAAGATGACATAGGAGAGGAACTTCTTTCACCTTTGTGTCAGTTTATCAAACCCATACCTGGATGA	2.61668	2.24896	2.48883	1.05137	1.05137
hp_mmu-mir-615_st	TCGGGAGGGGCGGGAGGGGGGTCCCCGGTGCTCGGATCTCGAGGGTGCTTATTGTTCGGTCCGAGCCTGGGTCTCCCTCTTCCCCCC	2.3682	2.18656	2.18656	1.08307	1.08307
hp_mmu-mir-652_st	AGGAACAGCTATGTACTGCACAACCCTAGGAGGGGGTGCCATTCACATAGAGTATAATTGAATGGCGCCACTAGGGTTGTGCAGTGT	2.15811	2.08881	2.65518	0.812793	-1.23033
hp_mmu-mir-653_st	CATTCTTTCAGTGTTGAAACAATCTCTACTGAACCAAGCTCCAAAGCGAGTTCACTGGAGTTTGTTTCAGTATTGCAGGAGTGCT	3.21231	2.03636	3.39199	0.947029	-1.05593
hp_mmu-mir-654_st	CTCGGTAAGTGGGAAGATGGTAAGCTGCAGAACATGTGTGTTTCTCATGTCATATGTCTGCTGACCATCACCTTTGGGTCTCTG	1.91884	2.57744	2.01984	0.949998	-1.05263
hp_mmu-mir-664_st	CTGGCTGGGGAAAATGACTGGATAGAAAACATTATTCTATTCATTTACTCCCCAGCCTACACATGAAAG	3.55727	4.5106	3.08832	1.15185	1.15185
hp_mmu-mir-665_st	AGAACAGGGTCTCCTTGAGGGGCCTCTGCCTCTATCCAGGATTATGTTTTTATGACCAGGAGGCTGAGGTCCCTTACAGGCGGCCTC	2.29406	2.11879	2.73413	0.839045	-1.19183
hp_mmu-mir-666_st	CTGATTCTGCCTGCGTGGAGCGGGCACAGCTGTGAGAGCCCCCTAGGTACAGCGGGGCTGCAGCGTGATCGCCTGCTCACGCACAGG	2.28827	2.27343	2.34712	0.97493	-1.02572
hp_mmu-mir-667_st	GTGGGTACTGGCCTCGGTGCTGGTGGAGCAGTGAGCACGCCATACATTATATCTGTGACACCTGCCACCCAGCCCAAGGCCCCTAGG	2.72308	3.28679	2.78412	0.978077	-1.02241
hp_mmu-mir-668_st	GGTAAGTGTGCCTCGGGTGAGCATGCACTTAATGTAGGTGTATGTCACTCGGCTCGGCCCACTACC	2.36043	2.13051	2.61647	0.902144	-1.10847
hp_mmu-mir-669b_st	ATGAATGTATGTGCATGTGTATATAGTTTTGTGTGCATGTGCATGTGTGTCTATTAATGTACATATACATACACACAAACATATACA	2.41434	2.68758	3.1185	0.774201	-1.29165
hp_mmu-mir-669b_x_st	ATGAATGTATGTGCATGTGTATATAGTTTTGTGTGCATGTGCATGTGTGTCTATTAATGTACATATACATACACACAAACATATACA	2.11594	2.78823	2.33785	0.905082	-1.10487
hp_mmu-mir-669c_st	CCTCCATGTATGTGCATGTGTGTATAGTTGTGTGTGGATGTGTGTATTTGCATATAAATAACATACACACACACACACAAGTAAACA	3.62842	2.5282	2.08571	1.73965	1.73965
hp_mmu-mir-669c_x_st	CCTCCATGTATGTGCATGTGTGTATAGTTGTGTGTGGATGTGTGTATTTGCATATAAATAACATACACACACACACACAAGTAAACA	2.83049	3.30848	2.20529	1.2835	1.2835
hp_mmu-mir-669d_st	CAGCCCGGGATTTGTGTGTTGCTTGCTCTATATGTGTGTATACTTGTGTGTGCATGTATATGTGTGTATATGAATATACATATACAT	2.78591	5.53764	3.02074	0.922263	-1.08429
hp_mmu-mir-669d_x_st	CAGCCCGGGATTTGTGTGTTGCTTGCTCTATATGTGTGTATACTTGTGTGTGCATGTATATGTGTGTATATGAATATACATATACAT	3.31275	5.78012	2.53172	1.3085	1.3085
hp_mmu-mir-669e_st	GCCTGGGATTCATGGGCTGTACCCTATATATGGGCAGGTGTGTGTCTTGTGTGTGCATGTTCATTTGTGTATATGAATATGAATATA	2.26861	2.98887	2.66861	0.850109	-1.17632
hp_mmu-mir-669f_st	TGTATGTGCCTGTGTGTATAGTTGTGTGTGCATGTGCATGTGTGTATATGAATATACATATACATACACACACACGTATAAACGCAA	4.36911	4.40103	2.43711	1.79274	1.79274
hp_mmu-mir-669f_x_st	TGTATGTGCCTGTGTGTATAGTTGTGTGTGCATGTGCATGTGTGTATATGAATATACATATACATACACACACACGTATAAACGCAA	2.28827	6.41785	3.09016	0.740504	-1.35043
hp_mmu-mir-669g_st	CATGTGTGCTTACTTGTATGTGCATTGTATGTGTTGACATGATATACATAACATAAACACACGTGTATCTGCAAGCACACACACACA	3.28376	3.18683	2.57517	1.27516	1.27516
hp_mmu-mir-669h_st	TGTGATGCCCACCAAAAATATGCATGGGTGTATAGTTGAGTGCATATTCATTTCTCTATATGAATATGCATATACACACATGCACAC	1.93907	2.70028	3.03555	0.638786	-1.56547
hp_mmu-mir-669h_x_st	TGTGATGCCCACCAAAAATATGCATGGGTGTATAGTTGAGTGCATATTCATTTCTCTATATGAATATGCATATACACACATGCACAC	2.57625	2.9893	3.45899	0.744797	-1.34265
hp_mmu-mir-669i_st	ATGTGATGCCCACCAATAATGTGCATGTGTGTATAGTTGTGTGCATATTCATTTCTCTATATGACTATGCATATACACACATGCATA	2.4155	2.44208	2.40232	1.00548	1.00548
hp_mmu-mir-669i_x_st	ATGTGATGCCCACCAATAATGTGCATGTGTGTATAGTTGTGTGCATATTCATTTCTCTATATGACTATGCATATACACACATGCATA	1.96512	2.13268	2.59906	0.756088	-1.3226
hp_mmu-mir-669j_st	AGCATGCGATTCATGTGATGTCCACCAAGAATGTGCATGTGTGTATAGTTGTGTACATATTCACTTTTGTATATGAATATGCATATA	2.04744	2.58134	1.86963	1.0951	1.0951
hp_mmu-mir-669j_x_st	AGCATGCGATTCATGTGATGTCCACCAAGAATGTGCATGTGTGTATAGTTGTGTACATATTCACTTTTGTATATGAATATGCATATA	2.78591	1.92891	2.72833	1.0211	1.0211
hp_mmu-mir-669k_st	TCTTATGCCCACCAAAAATGTGCATGTGTGTATAGTTGTGTGCATATTCACTTCTCTATATGAATATGCATATACACGCATGCAAAC	2.60312	2.86199	3.16214	0.823214	-1.21475
hp_mmu-mir-669l_st	GTTTGTGCATGTGCGTATAGTTGTGTGTGCATGTATATGTGTGTATATGAATATACATATACATACACACCCATATATACACGCATT	2.61357	2.09577	2.89411	0.903064	-1.10734
hp_mmu-mir-669l_x_st	GTTTGTGCATGTGCGTATAGTTGTGTGTGCATGTATATGTGTGTATATGAATATACATATACATACACACCCATATATACACGCATT	3.53311	3.19036	2.26399	1.56057	1.56057
hp_mmu-mir-669m-1_x_st	TGTATGTGCATGTGTGTATAGTTTTGTGTGCATGTGCATGTGTGTATATGAATAGACATATACATCCACACAAACATATACAAGCAA	2.67528	3.47177	3.41503	0.783383	-1.27651
hp_mmu-mir-669m-2_x_st	ATATTTGCATGTGTGTATAGTTTTGTGTGCATGTGCATGTGTGTATATGAATATACATATACATCCACACAAACATATACAAGCATG	2.76884	3.56524	2.76247	1.0023	1.0023
hp_mmu-mir-669n_st	TACATTTGTGTGTGGATGTGTGTGTAAATGTATGTGCATCCCACAGCACATGTG	2.44784	2.58564	2.47416	0.989362	-1.01075
hp_mmu-mir-669n_x_st	TACATTTGTGTGTGGATGTGTGTGTAAATGTATGTGCATCCCACAGCACATGTG	2.99958	2.81368	2.68252	1.11819	1.11819
hp_mmu-mir-669o_x_st	TGCATGTGCATGTGTGTATAGTTGTGTGTGCATGTTTATGTGTGTATTTGAATATACATAACATACACACACACGTATAAACACAAG	4.03674	4.59072	3.69686	1.09194	1.09194
hp_mmu-mir-670_st	GGTTTGGAGGTGGGCCTGACATCCCTGAGTGTATGTGGTGAACCTGAACTTGCCCTGGGTTTCCTCATATCCATTCAGGAGTGTCAG	1.96698	2.15264	2.20477	0.892146	-1.12089
hp_mmu-mir-671_st	TGGCAGGCCAGGAAGAGGAGGAAGCCCTGGAGGGGCTGGAGGTGATGGATGTTTTCCTCCGGTTCTCAGGGCTCCACCTCTTTCGAG	1.78348	2.80761	2.47928	0.719356	-1.39013
hp_mmu-mir-672_st	GATGGTGATCTAGCCCTTTAGTTTTGAGGTTGGTGTACTGTGTGTGAGTATACATATTTATCACACACAGTCACTATCTTCGAAAGT	2.13818	2.28667	3.05425	0.700065	-1.42844
hp_mmu-mir-673_st	TGGAGCCTGAGGGGCTCACAGCTCTGGTCCTTGGAGCTCCAGAGAAAATGTTGCTCCGGGGCTGAGTTCTGTGCACCCCCCTTGCCC	2.14677	3.53204	2.35399	0.911971	-1.09653
hp_mmu-mir-674_st	GGCCTAGTCATCACCCTGAGCCTTGCACTGAGATGGGAGTGGTGTAAGGCTCAGGTATGCACAGCTCCCATCTCAGAACAAGGCTCG	2.21407	2.79473	2.57446	0.860013	-1.16277
hp_mmu-mir-675_st	TGCGGCCCAGGGACTGGTGCGGAAAGGGCCCACAGTGGACTTGGTACACTGTATGCCCTAACCGCTCAGTCCCTGGGTCTGGCA	2.36748	1.87794	2.16126	1.09542	1.09542
hp_mmu-mir-676_st	CTTTGCCTGAATGCATGACTCTACAACCTTAGGACTTGCAGAATTAAAGGAATGCCGTCCTGAGGTTGTTGAGCTGTGCGTTTCTGG	3.05923	2.55962	2.51636	1.21574	1.21574
hp_mmu-mir-677_st	GAGCCTTCAGTGATGATTAGCTTCTGACTTTCGTTCTTCTGAATTTGCTGAAGCCAGATGCCGTTCCTGAGAAGGGGAAAATGGACA	2.75265	2.75265	2.65518	1.03671	1.03671
hp_mmu-mir-678_st	GTGGACTGTGACTTGCAGAGCTGTGCTCCAATATGAGAGATGGCCATGCACCCGTGTCTCGGTGCAAGGACTGGAGGTGGCAGT	2.07529	2.21743	1.89445	1.09545	1.09545
hp_mmu-mir-679_st	CTATGGCTTTGGACTGTGAGGTGACTCTTGGTGTGTGATGGCTTTTCAGCAAGGTCCTCCTCACAGTAGCTATA	1.74764	3.86876	1.63956	1.06592	1.06592
hp_mmu-mir-680-1_st	AGAAGTGGGCATCTGCTGACATGGGGGCCGAAGTCAGGCGCCAGGAAGCGGGCACTTTGCATCTTATCTCCGGAACATCGATCCTCT	2.58467	2.28314	2.5666	1.00704	1.00704
hp_mmu-mir-680-2_st	GGGCATCTGCTGACATGGGGGCCGAAGTCAGGCGCCAGGCATCGGGCACTCTGGATCTTATCTCTGGAACATTGATCCTCCTTGACA	2.42251	2.34616	2.09808	1.15463	1.15463
hp_mmu-mir-680-2_x_st	GGGCATCTGCTGACATGGGGGCCGAAGTCAGGCGCCAGGCATCGGGCACTCTGGATCTTATCTCTGGAACATTGATCCTCCTTGACA	3.2017	2.95449	2.60525	1.22894	1.22894
hp_mmu-mir-680-3_st	GGGGGATTTAACAAAGAACAAAAAAGGTGGGCATCTGCTGACATGGGGGCAGAAGTCAGGCTCTAGGCAGCAGGTACTCTTCATCTT	2.69454	2.91444	2.47228	1.0899	1.0899
hp_mmu-mir-680-3_x_st	GGGGGATTTAACAAAGAACAAAAAAGGTGGGCATCTGCTGACATGGGGGCAGAAGTCAGGCTCTAGGCAGCAGGTACTCTTCATCTT	2.47928	2.69118	2.87364	0.862765	-1.15906
hp_mmu-mir-681_st	GCAGCCTCGCTGGCAGGCAGCTCCAGAGTGTGGCTGTCCTCATCACTCTCCCTAAGCAGGTAGATGGGTTTCAGTTCACTCGCAGTC	2.14677	2.10994	2.14677	1	1
hp_mmu-mir-682_st	GCCGTCGGCATCTGGCACTGTGGTTCCTGCATGAAAACAGTGGCCGGCGGGGCCTGGACCTACAACACCACCTCTGCAGTCACAGTG	2.4981	2.68703	1.80379	1.38492	1.38492
hp_mmu-mir-683-1_s_st	TGGGAAGTCCAGCTGGGAGGCTGCAGTGGACCCAGGCTAAAAGCCAAGCTTTTCTGCACTGCAGTGGATGCCTGCTGTAAGCTGTGT	2.41001	1.92132	1.88087	1.28133	1.28133
hp_mmu-mir-683-2_s_st	TGGGAAGTCCAGCTGGGAGGCTGCAGTGGACCCAGGCTAAAAGCCAAGCTTTTCTGCACTGCAGTGGATGCCTGCTGTAAGCTGTGT	3.23573	3.23553	2.97195	1.08876	1.08876
hp_mmu-mir-684-1_s_st	GTAGGGCAATCTGTCTTTAAGTAGGGATAAATTACTCTTGAACAAAATGATCCTAGATAGTTTTCCCTTCAAGTCAAGCGTCTTGC	2.55326	1.85762	2.2843	1.11774	1.11774
hp_mmu-mir-684-2_s_st	TGTAGGGCAATCTGTCTTTAAGTAGGGATAAATTACTCTTGAACAAAATGATCCTAGATAGTTTTCCCTTCAAGTCAAGTGTCTTG	2.28827	2.71107	2.65518	0.861815	-1.16034
hp_mmu-mir-686_s_st	GCCACAGCAGGTGCTTATATTGCTTCCCAGACGGTGAAGAAAGTAATAGAGATCAACCCGTACCTTCTGGGCACCATGGCTGGGGGT	2.57785	2.46135	2.61623	0.985331	-1.01489
hp_mmu-mir-687_st	ATAGTCTGACACACATTTTACACTATCCTGGAATGCAGCAATGAATCCTGGGTTATTGTTTCAGTCTGTCATTGTATTCTTGGAAAG	2.79162	3.22328	2.78987	1.00062	1.00062
hp_mmu-mir-688_st	GAAAGGGCAGTGAAGAAAAGTAGGGGCTTGCTTGGGGAGAGCACCTCGCAGGCGACTACTTATTCCAGCTCGCCC	2.09837	3.16837	2.25694	0.92974	-1.07557
hp_mmu-mir-690_st	TGTGTTTTTGTGGAGCTAATTGGCTGTATTAAAGTGCTAGTAAGAAACATTCTCCTCCAGCTGGAGAGATGGCTCAGCTGTTAAAGG	2.58306	2.39665	2.21283	1.16731	1.16731
hp_mmu-mir-691_st	GCTGATTTATTTTTGCTTTCTTCCTTGGGTCTGCTTTGAATATTCCTGAAGAGAGGCAGAAAATGTTATATTTAATAT	3.1703	3.09016	2.30397	1.37602	1.37602
hp_mmu-mir-692-1_s_st	AGGGTGGCAGGGCCACAACCAGCGCAGACTGGCGCGCCCCAGGGATCTCTGGGTGAGTATCTCTTTGAGCGCCTCACTCTCAAGCAC	3.18069	3.11811	2.35489	1.35067	1.35067
hp_mmu-mir-692-1_x_st	AGGGTGGCAGGGCCACAACCAGCGCAGACTGGCGCGCCCCAGGGATCTCTGGGTGAGTATCTCTTTGAGCGCCTCACTCTCAAGCAC	3.03063	2.53055	2.09144	1.44906	1.44906
hp_mmu-mir-692-2_s_st	GGTGGCAGGGCCACAACCAGCGCAGACTGGCGCGCCCCAGGGATCTCTGGGCGAGTATCTCTTTGAGCGCCTCACTCTCAAGCACGA	2.33563	2.15648	2.18245	1.07018	1.07018
hp_mmu-mir-692-2_x_st	GGTGGCAGGGCCACAACCAGCGCAGACTGGCGCGCCCCAGGGATCTCTGGGCGAGTATCTCTTTGAGCGCCTCACTCTCAAGCACGA	2.16421	3.06526	2.80589	0.771309	-1.2965
hp_mmu-mir-693_st	AGTTGTAGGCATGCTCATTACAGCCACATCCGAAAGTTTTCCTGGCTAGGGCAGCTTTCAGATGTGGCTGTAATGAGCATGCTCCCA	2.10341	2.41704	2.51727	0.835592	-1.19676
hp_mmu-mir-693_x_st	AGTTGTAGGCATGCTCATTACAGCCACATCCGAAAGTTTTCCTGGCTAGGGCAGCTTTCAGATGTGGCTGTAATGAGCATGCTCCCA	3.10125	2.49296	2.11351	1.46735	1.46735
hp_mmu-mir-694_st	AAAGGCCAGCTCAGGCATCGCTTTCAACCCAAGACCAGGCTGAAAATGTTGCCTGAAGCAGTCTCTGCCT	2.28675	2.28827	2.13155	1.07281	1.07281
hp_mmu-mir-695_st	TCACGAGGAATCCTAGATTGGGCATAGGTGACTGAAGTACACAGCTGCCTTTCTTACAAAGGCACTGGTTACCTTGGTCCTGGTCAC	2.79702	2.6766	2.65518	1.05342	1.05342
hp_mmu-mir-697_st	GAGTGGGGATGTGTCCTGGATGTTGGTCTTGACAGGTCTCAGAGGTGACTACCACACATTGAAGGGGTGGCGGTAACATCCTGGTCC	2.25511	3.39255	2.28869	0.985331	-1.01489
hp_mmu-mir-698_st	TCATCTCTGCCCTCACTGTAAGGGAGGGTGGTGGCTATGTGGGTGGGACAGGGATGTTCAGTTGCTAAAGACATTCTCGTTTCCTTC	2.24076	2.42691	2.58154	0.867996	-1.15208
hp_mmu-mir-700_st	TTCACTGGGAGTAAGGCTCCTTCCTGTGCTTGCAGGGGAGAAATACGAACTGCACGCGGGAACCGAGTCCACCCCCAGT	2.15566	2.72871	2.73538	0.788067	-1.26893
hp_mmu-mir-701_st	GTGGAGCATCTACCTTGAGCAAGTAATTAGCCGCTGAAATAGATGGATTGTATAGATGAGGTTCTATCTATTAAAGAGGCTAGCCAC	2.34091	2.53197	2.8015	0.835592	-1.19676
hp_mmu-mir-702_st	CGGGACAAGGTGAGTGGGGTGGTTGGCATGGGTTGCCCATGGGGACTCGACGCTGTGCCCACAGCCTCCTGATGTCCTCCTCACGCA	3.11118	2.37672	2.39572	1.29864	1.29864
hp_mmu-mir-703_st	AGACTGGTTAATGATAACAATGCATCATAAAACCTTCAGAAGGAAAGAATGTTGTGGACCATTTTTTTTTGTGTGTGGCAGTTTTAA	2.55207	2.46135	2.96126	0.861821	-1.16033
hp_mmu-mir-704_st	GCTGGGAGCTAGAGGATGTGGTCAGCTGCAAGGATCTTCCTCAGACATGTGCTCTGCTCCTAGGGATTGTTGACTAC	1.87391	2.32229	2.66143	0.704101	-1.42025
hp_mmu-mir-705_st	ATGTCCCAGTAGTGGTGGGAGGTGGGGTGGGCACAGAGGGAATGACTTCTTTCTCCTGCAGTCCTCCCTACCTCCCTAACAT	2.07661	5.68721	1.71453	1.21118	1.21118
hp_mmu-mir-707_st	GGCATGCAGTCATGCCGCTTGCCTACGCTTGTGTGAGCATGGGCATGCGGTCATAGTTGTTGCGGGCAATTCG	2.07322	2.46347	2.46412	0.841363	-1.18855
hp_mmu-mir-708_st	CTGTGTTTGAAATGGGGACTGCCCTCAAGGAGCTTACAATCTAGCTGGGGGTAGATGACTTGCACTTGAACACAACTAGACTGTGAG	2.33702	2.35932	2.74638	0.850946	-1.17516
hp_mmu-mir-708_x_st	CTGTGTTTGAAATGGGGACTGCCCTCAAGGAGCTTACAATCTAGCTGGGGGTAGATGACTTGCACTTGAACACAACTAGACTGTGAG	2.72429	1.92198	2.34642	1.16104	1.16104
hp_mmu-mir-709_st	TGTCCCGTTTCTCTGCTTCTACTCAGAAGTGCTCTGAGCATAGAACTGTCCTGTTTGAGCAGCACTGGGGAGGCAGAGGCAGGAGGA	2.14677	2.18274	2.14677	1	1
hp_mmu-mir-710_st	CTCTCTCGTCAAATAGAAGCCAAGTCTTGGGGAGAGTTGAGCTTGGTGTGAAAACTGACATACCCCTTCAACTCTTTAGAACTTAGG	2.78591	2.76937	2.45525	1.13468	1.13468
hp_mmu-mir-711_st	CATGTTCCTAACTTTGAATCTCTTCTTAGGGTGCTTCAGGCAAAGCTGGGGACCCGGGGAGAGATGTAAGTCTGGGGAGATG	2.69834	1.97438	2.47746	1.08916	1.08916
hp_mmu-mir-713_st	GGCCTATCCGGAGGCCCTGATTGGTTAGTGAGACTTGATTGACATGAGCACCTCCCTTAGGGTTAGAGTGCACTGAAGGCACACAGC	2.33388	1.97437	2.18954	1.06592	1.06592
hp_mmu-mir-717_st	TTGTCCGCTATCACTGTACCGTCATTTTTCAGTCTCAGACAGAGATACCTTCTCTGAATTCATAGAAGCTGCTCTCCGTTCCGAAGG	2.21269	2.37323	2.22647	0.993809	-1.00623
hp_mmu-mir-719_st	TTTAGGTGCTTAAAGAACAGTATCTCGGCTACAGAAAAATGTTTTTGGGTGATGCTGTGGATGTGTTTGAAGCCAGGAGAACAGAAG	2.44396	3.65778	2.38748	1.02366	1.02366
hp_mmu-mir-720_st	CTGGAGCCCCAGAATGAAGATGCAGCTTTAGAATTTGGGTGGTCTATCTCGCTGGGGCCTCCAG	2.59294	2.97508	2.49834	1.03787	1.03787
hp_mmu-mir-721_st	GGAAGACAGTGCAATTAAAAGGGGGAAAAAAGTACCTGGGATGTTCTGAGAATTTCATTTTTCTTGTTATTGCCACTCCTGCTTGGA	2.59512	2.47955	1.932	1.34323	1.34323
hp_mmu-mir-741_st	TTGATCTACGTAGATTGGTACCTATCATGTAAATCATGTAAGCATGAGAGATGCCATTCTATGTAGATTAA	2.16222	2.04724	2.16222	1	1
hp_mmu-mir-742_st	TGCTCTACTCACATGGTTGCTAATCACGTGAAGTGTAGGTGAAAGCCACCATGCTGGGTAAAGTA	2.271	2.04846	2.7663	0.820952	-1.2181
hp_mmu-mir-743a_st	CTGTATTCAGATTGGTGCCTGTCATGTTTATAAGAATGAAAGACACCAAGCTGAGTAGAGTA	1.96896	2.83343	3.07094	0.641159	-1.55968
hp_mmu-mir-743b_st	TGCAGTGCTGTGTTCAGACTGGTGTCCATCATGTGAAATATTTGTGAAAGACATCATGCTGAATAGAGTAAGGCCCA	2.31394	2.2976	2.36359	0.978993	-1.02146
hp_mmu-mir-744_st	GGCTGGGCAAGGTGCGGGGCTAGGGCTAACAGCAGTCTTACTGACGGTTTCCTGGAAACCACACACATGCTGTTGCCACTAACCTCA	1.97675	2.37578	2.66946	0.740505	-1.35043
hp_mmu-mir-758_st	TGGGTGCGTGAGGTGGTTGACCAGAGAGCACACGCTATATTTGTGCCGTTTGTGACCTGGTCCACTAACCCTCAGTATCTA	2.90235	2.75538	2.83341	1.02433	1.02433
hp_mmu-mir-758_x_st	TGGGTGCGTGAGGTGGTTGACCAGAGAGCACACGCTATATTTGTGCCGTTTGTGACCTGGTCCACTAACCCTCAGTATCTA	2.19643	2.28438	2.08753	1.05216	1.05216
hp_mmu-mir-759_st	GGATTATAATAAATTAAATGCCTAAACTGGCAGAGTGCAAACAATTTTGACTCAGATCTAAATGTTTGCACTGGCTGTTTAAACATT	2.40732	2.88574	2.66052	0.904831	-1.10518
hp_mmu-mir-760_st	CGGGAGGATGCCTCGGTGCGGGGCGCGTCGCCCCCCTCAGGCCACCAGAGCCCGGATACCTCAGAAATTCGGCTCTGGGTCTGTGGG	3.34376	2.92925	1.97798	1.69049	1.69049
hp_mmu-mir-761_st	TGGCAAGTGGAGGAGCAGCAGGGTGAAACTGACACAGTGCTGGTGAGTTTCACTTTGCTGCTCCTCCTGACTCCCA	2.18333	2.72025	2.79555	0.781003	-1.2804
hp_mmu-mir-763_st	AATGATGGAGGTGCAGGCGTTTCCTGGGGATTAATGACCAGCTGGGAAGAACCAGTGGCCCTCGGCTCTGCCTCCCAGCCAGCCATT	2.72644	2.45591	2.02976	1.34323	1.34323
hp_mmu-mir-764_st	TCAACACAATCTGAATCTTGGAGGCAGGTGCTCACATGTCCTCCTCCATGCTTATAAATACATGGAGGAGGCCATAGTGGCAACTGT	1.99646	2.65518	2.42382	0.823683	-1.21406
hp_mmu-mir-767_st	AGAATCCATATAGGTTTTTACTCATGCACCATGGTTGTCTGAGCACATAACATGCTTGTCTGCTCATACCCTATGGTTCCTGAAGAG	3.16984	1.84754	2.23671	1.41719	1.41719
hp_mmu-mir-770_st	GCCACCTTCTGTGCCCCCAGCACCACGTGTCTGGGCCACGTGAGCAACGCCACGTGGGCCTGACGTGGAGCTGGGGCCGCAGGGGTC	3.10799	2.81962	2.58363	1.20295	1.20295
hp_mmu-mir-7a-1_st	TTGGATGTTGGCCTAGTTCTGTGTGGAAGACTAGTGATTTTGTTGTTTTTAGATAACTAAAACGACAACAAATCACAGTCTGCCATA	1.96698	2.54638	2.41254	0.815316	-1.22652
hp_mmu-mir-7a-1_x_st	TTGGATGTTGGCCTAGTTCTGTGTGGAAGACTAGTGATTTTGTTGTTTTTAGATAACTAAAACGACAACAAATCACAGTCTGCCATA	2.52487	2.9606	1.96216	1.28678	1.28678
hp_mmu-mir-7a-2_st	GGTCGGGCCAGCCCCGTTTGGAAGACTAGTGATTTTGTTGTTGTGTCTCTGTATCCAACAACAAGTCCCAGTCTGCCACATGGTGCT	2.78211	3.87807	2.93828	0.946851	-1.05613
hp_mmu-mir-7b_st	AGGAGCGGAGTACGTGAGCCAGTGCTATGTGGAAGACTTGTGATTTTGTTGTTCTGATATGATATGACAACAAGTCACAGCCAGCCT	1.93486	2.22942	2.61181	0.740812	-1.34987
hp_mmu-mir-802_st	GGTCCTATTATTTGCAATCAGTAACAAAGATTCATCCTTGTGTCAATCATACAACACGGAGAGTCTTTGTCACTCAGTGTAATTAAT	2.25793	2.18401	3.14243	0.71853	-1.39173
hp_mmu-mir-804_st	CCCTACACATCCATCTTTGAGGTTACAACTTCCCCAGTAGACTGTTTCCTGACATTCCTTGTGAGTTGTTCCTCACCTGGAAGATGT	2.45472	2.59388	2.15964	1.13664	1.13664
hp_mmu-mir-871_st	TGCAGTGCTCTATTCAGATTAGTGCCAGTCATGTGAAATACATATGACTGGCACCATTCTGGATAATGTAATGCTCA	2.645	3.00293	3.09016	0.855945	-1.1683
hp_mmu-mir-872_st	AACTTGTTAGAAGGTTACTTGTTAGTTCAGGACCTCATTACTTTCTGCCTGAACTATTGCAGTAGCCTCCTAACTGGTTAT	2.78591	2.42152	2.14677	1.29772	1.29772
hp_mmu-mir-873_st	GTGTGCATTTGCAGGAACTTGTGAGTCTCCTATTGAAAATAGACAGGAGACTGACAAGTTCCCGGGAACACCCACAA	2.80043	2.0044	2.35399	1.18965	1.18965
hp_mmu-mir-874_st	TTAGCCCTGCGGCCCCACGCACCAGGGTAAGAGAGACTCACTTCCTGCCCTGGCCCGAGGGACCGACTGGCTGGGC	3.43576	3.04983	4.88504	0.703323	-1.42182
hp_mmu-mir-875_st	TCTGTGGTACTATACCTCAGTTTTATCAGGTGTTCATTAAAATCACCTGAAAATACTGAGGCTATGTTTCACTGAGCA	2.03989	2.18838	2.17487	0.937935	-1.06617
hp_mmu-mir-876_st	TCACGTGCTATGGATTTCTCTGTGAATCACTATATCAAATCTAGTGTGGTAGTGGTTTACAAAGTAATTCATAGTGCTTCA	1.99909	2.32564	2.2316	0.89581	-1.11631
hp_mmu-mir-877_st	GTAGAGGAGATGGCGCAGGGGACACAAGGTAGGCCTTGCGGGTCTGTGGACCCTTGGACATGTGTCCTCTTCTCCCTCCTCCCAG	2.29738	3.09914	2.53831	0.905082	-1.10487
hp_mmu-mir-878_st	TGCAATGCTTTATCTAGTTGGATGTCAAGACACGTGAAACTTAAGTGCATGACACCACACTGGGTAGAGGAGGGCTCA	2.10242	2.62541	2.20076	0.955316	-1.04677
hp_mmu-mir-879_st	TTCTAGGTCCAGAGGCTTATAGCTCTAAGCCTTGGATGAAAGAGGCTTATGGCTTCAAGCTTTCGGAGCTGGAGAC	2.78528	2.21289	2.72809	1.02096	1.02096
hp_mmu-mir-880_st	TGCACTGCAATACTCAGATTGATATGAGTCACTTCCTATTGCATGTTACTCCATCCTCTCTGAGTAGAGTAAGGCACA	1.96683	3.52397	2.28218	0.861823	-1.16033
hp_mmu-mir-881_st	TGCAGTACAATATTCAGAGAGATAACAGTCACATCTTTTCTAAAGTAACTGTGTCTTTTCTGAATAGAGTAATGTTCA	2.8697	1.86318	2.27725	1.26016	1.26016
hp_mmu-mir-882_st	CAGCAGTACCAGGAGAGAGTTAGCGCATTAGTGCAATAGTTAGTCCTGATTTCTGGGTTTTTCTAATGGCTGCTCTT	2.66946	2.53081	2.7578	0.967967	-1.03309
hp_mmu-mir-883a_st	GCACTATAATGCTGAGAGAAGTAGCAGTTACTTTATTCTATAAGTAACTGCAACAGCTCTCAGTATTGTAAGGCTC	2.43952	2.01086	2.67502	0.911965	-1.09653
hp_mmu-mir-883a_x_st	GCACTATAATGCTGAGAGAAGTAGCAGTTACTTTATTCTATAAGTAACTGCAACAGCTCTCAGTATTGTAAGGCTC	2.38523	2.18548	2.24086	1.06443	1.06443
hp_mmu-mir-883b_st	TGCAATGCATTACTGAGAATGGGTAGCAGTCACTTTGTACTATGAGTAACTGCAACATCTCTCAGTATTGTAAGGTTC	2.42577	2.64134	2.35584	1.02968	1.02968
hp_mmu-mir-883b_x_st	TGCAATGCATTACTGAGAATGGGTAGCAGTCACTTTGTACTATGAGTAACTGCAACATCTCTCAGTATTGTAAGGTTC	1.70954	2.39742	2.43917	0.700869	-1.4268
hp_mmu-mir-9-1_st	CGGGGTTGGTTGTTATCTTTGGTTATCTAGCTGTATGAGTGGTGTGGAGTCTTCATAAAGCTAGATAACCGAAAGTAAAAATAACCC	2.54857	7.01552	2.6191	0.973073	-1.02767
hp_mmu-mir-9-1_x_st	CGGGGTTGGTTGTTATCTTTGGTTATCTAGCTGTATGAGTGGTGTGGAGTCTTCATAAAGCTAGATAACCGAAAGTAAAAATAACCC	2.63565	2.93648	2.43437	1.08268	1.08268
hp_mmu-mir-9-2_st	GTTGTTATCTTTGGTTATCTAGCTGTATGAGTGTATTGGTCTTCATAAAGCTAGATAACCGAAAGTAAAAAC	2.03701	2.47382	2.16897	0.939158	-1.06478
hp_mmu-mir-9-2_x_st	GTTGTTATCTTTGGTTATCTAGCTGTATGAGTGTATTGGTCTTCATAAAGCTAGATAACCGAAAGTAAAAAC	2.28956	2.14677	2.49884	0.916248	-1.09141
hp_mmu-mir-9-3_st	GGAGGCCCGTTTCTCTCTTTGGTTATCTAGCTGTATGAGTGCCACAGAGCCGTCATAAAGCTAGATAACCGAAAGTAGAAATGACTC	6.09793	2.14677	2.97869	2.04718	2.04718
hp_mmu-mir-9-3_x_st	GGAGGCCCGTTTCTCTCTTTGGTTATCTAGCTGTATGAGTGCCACAGAGCCGTCATAAAGCTAGATAACCGAAAGTAGAAATGACTC	4.73426	3.13544	2.68911	1.76053	1.76053
hp_mmu-mir-92a-1_st	CTTTCTACACAGGTTGGGATTTGTCGCAATGCTGTGTTTCTCTGTATGGTATTGCACTTGTCCCGGCCTGTTGAGTTTGG	3.40272	2.99447	2.53022	1.34484	1.34484
hp_mmu-mir-92a-1_x_st	CTTTCTACACAGGTTGGGATTTGTCGCAATGCTGTGTTTCTCTGTATGGTATTGCACTTGTCCCGGCCTGTTGAGTTTGG	2.32973	1.67198	1.84875	1.26017	1.26017
hp_mmu-mir-92a-2_st	TGCCCATTCATCCACAGGTGGGGATTGGTGGCATTACTTGTGTTAGATATAAAGTATTGCACTTGTCCCGGCCTGAGGAAGAAAGAG	2.6761	2.39954	2.1898	1.22207	1.22207
hp_mmu-mir-92a-2_x_st	TGCCCATTCATCCACAGGTGGGGATTGGTGGCATTACTTGTGTTAGATATAAAGTATTGCACTTGTCCCGGCCTGAGGAAGAAAGAG	2.37495	2.65518	2.01733	1.17727	1.17727
hp_mmu-mir-92b_st	GGTGGGCGGGAGGGACGGGACGTGGTGCAGTGTTGTTCTTTCCCCTGCCAATATTGCACTCGTCCCGGCCTCCGGCCCCCTCG	2.28827	4.32039	3.09016	0.740504	-1.35043
hp_mmu-mir-93_st	AGTCATGGGGGCTCCAAAGTGCTGTTCGTGCAGGTAGTGTAATTACCTGACCTACTGCTGAGCTAGCACTTCCCGAGCCCCCAGGAC	3.47774	2.78916	2.43326	1.42925	1.42925
hp_mmu-mir-96_st	CCAGTACCATCTGCTTGGCCGATTTTGGCACTAGCACATTTTTGCTTGTGTCTCTCCGCTGTGAGCAATCATGTGTAGTGCCAATAT	1.72421	1.87617	1.85968	0.927153	-1.07857
hp_mmu-mir-98_st	CTGCACATGCTGGGGTGAGGTAGTAAGTTGTATTGTTGTGGGGTAGGGATTTTAGGCCCCAGTAAGAAGATAACTATACAACTTACT	2.96335	3.28697	2.81964	1.05097	1.05097
hp_mmu-mir-99a_st	CATAAACCCGTAGATCCGATCTTGTGGTGAAGTGGACCGCGCAAGCTCGTTTCTATGGGTCTGTG	2.47445	3.06046	2.70812	0.913717	-1.09443
hp_mmu-mir-99a_x_st	CATAAACCCGTAGATCCGATCTTGTGGTGAAGTGGACCGCGCAAGCTCGTTTCTATGGGTCTGTG	2.71906	2.4959	2.46943	1.10109	1.10109
hp_mmu-mir-99b_st	GGCACCCACCCGTAGAACCGACCTTGCGGGGCCTTCGCCGCACACAAGCTCGTGTCTGTGGGTCCGTGTC	2.14677	2.11076	3.63096	0.591242	-1.69136
mmu-let-7a_st	UGAGGUAGUAGGUUGUAUAGUU	2.66682	7.8903	12.2142	0.218337	-4.58007
mmu-let-7a-star_st	CUAUACAAUCUACUGUCUUUCC	2.59086	2.85031	2.85031	0.908973	-1.10014
mmu-let-7b_st	UGAGGUAGUAGGUUGUGUGGUU	4.50851	33.3931	19.8728	0.226869	-4.40783
mmu-let-7b-star_st	CUAUACAACCUACUGCCUUCCC	2.83606	4.96337	2.98833	0.949046	-1.05369
mmu-let-7c_st	UGAGGUAGUAGGUUGUAUGGUU	34.543	107.677	118.927	0.290456	-3.44287
mmu-let-7c-1-star_st	CUGUACAACCUUCUAGCUUUCC	2.03293	2.12447	2.59366	0.783807	-1.27582
mmu-let-7c-2-star_st	CUAUACAAUCUACUGUCUUUCC	2.37889	4.3949	2.90625	0.818543	-1.22168
mmu-let-7d_st	AGAGGUAGUAGGUUGCAUAGUU	2.20898	5.94646	10.2891	0.21469	-4.65787
mmu-let-7d-star_st	CUAUACGACCUGCUGCCUUUCU	2.78591	6.31271	3.09016	0.901544	-1.10921
mmu-let-7e_st	UGAGGUAGGAGGUUGUAUAGUU	13.1097	43.177	48.7493	0.26892	-3.71858
mmu-let-7f_st	UGAGGUAGUAGAUUGUAUAGUU	2.67106	2.1985	2.39944	1.1132	1.1132
mmu-let-7f-star_st	CUAUACAAUCUAUUGCCUUCCC	2.71485	3.20086	2.63286	1.03114	1.03114
mmu-let-7g_st	UGAGGUAGUAGUUUGUACAGUU	2.78591	2.42852	2.94103	0.947258	-1.05568
mmu-let-7g-star_st	ACUGUACAGGCCACUGCCUUGC	2.72423	1.77291	2.06279	1.32065	1.32065
mmu-let-7i_st	UGAGGUAGUAGUUUGUGCUGUU	2.51373	8.09449	2.06347	1.21821	1.21821
mmu-let-7i-star_st	CUGCGCAAGCUACUGCCUUGCU	2.15958	2.09945	5.61058	0.384912	-2.598
mmu-miR-1_st	UGGAAUGUAAAGAAGUAUGUAU	2.13029	1.86411	2.16551	0.983734	-1.01654
mmu-miR-1-2-as_st	UACAUACUUCUUUACAUUCCA	2.51516	2.32329	2.09456	1.2008	1.2008
mmu-miR-100_st	AACCCGUAGAUCCGAACUUGUG	2.5096	3.23366	4.16567	0.602449	-1.65989
mmu-miR-101a_st	UACAGUACUGUGAUAACUGAA	2.56678	1.95255	2.14104	1.19885	1.19885
mmu-miR-101a-star_st	UCAGUUAUCACAGUGCUGAUGC	2.98872	2.44599	2.64262	1.13097	1.13097
mmu-miR-101b_st	UACAGUACUGUGAUAGCUGAA	2.47641	2.07599	2.27639	1.08787	1.08787
mmu-miR-103_st	AGCAGCAUUGUACAGGGCUAUGA	3.26855	36.1659	60.7608	0.0537937	-18.5896
mmu-miR-105_st	CCAAGUGCUCAGAUGCUUGUGGU	2.29873	2.50653	3.09016	0.743889	-1.34429
mmu-miR-106a_st	CAAAGUGCUAACAGUGCAGGUAG	4.0999	4.73006	5.17084	0.792889	-1.26121
mmu-miR-106b_st	UAAAGUGCUGACAGUGCAGAU	2.69086	3.04711	4.22397	0.637046	-1.56974
mmu-miR-106b-star_st	CCGCACUGUGGGUACUUGCUGC	2.11099	2.22962	2.15348	0.980269	-1.02013
mmu-miR-107_st	AGCAGCAUUGUACAGGGCUAUCA	2.14677	34.0002	65.7277	0.0326616	-30.617
mmu-miR-10a_st	UACCCUGUAGAUCCGAAUUUGUG	2.46993	2.39873	2.36511	1.04432	1.04432
mmu-miR-10a-star_st	CAAAUUCGUAUCUAGGGGAAUA	2.92841	2.23448	2.32708	1.25841	1.25841
mmu-miR-10b_st	UACCCUGUAGAACCGAAUUUGUG	2.35794	2.39775	1.92134	1.22724	1.22724
mmu-miR-10b-star_st	CAGAUUCGAUUCUAGGGGAAUA	2.24541	2.24541	2.14677	1.04595	1.04595
mmu-miR-1186_st	GAGUGCUGGAAUUAAAGGCAUG	1.86096	1.9696	2.15036	0.865415	-1.15552
mmu-miR-1186b_st	UGGGAUUAAAGGCAUGCACCAC	1.92203	1.82528	1.96902	0.976134	-1.02445
mmu-miR-1187_st	UAUGUGUGUGUGUAUGUGUGUAA	2.43026	9.30754	2.50006	0.972082	-1.02872
mmu-miR-1188_st	UGGUGUGAGGUUGGGCCAGGA	2.03144	5.27035	2.20598	0.920877	-1.08592
mmu-miR-1190_st	UCAGCUGAGGUUCCCCUCUGUC	2.2805	2.2795	2.54178	0.897205	-1.11457
mmu-miR-1191_st	CAGUCUUACUAUGUAGCCCUA	4.36242	3.06112	2.8973	1.50569	1.50569
mmu-miR-1192_st	AAACAAACAAACAGACCAAAUU	3.75341	15.368	6.58215	0.57024	-1.75365
mmu-miR-1193_st	UAGGUCACCCGUUUUACUAUC	2.39974	1.89125	1.99844	1.20081	1.20081
mmu-miR-1194_st	GAAUGAGUAACUGCUAGAUCCU	2.17223	2.63556	2.70122	0.804169	-1.24352
mmu-miR-1195_st	UGAGUUCGAGGCCAGCCUGCUCA	12.2712	5.41811	5.23729	2.34305	2.34305
mmu-miR-1196_st	AAAUCUACCUGCCUCUGCCU	2.83534	4.50941	2.50498	1.13188	1.13188
mmu-miR-1197_st	UAGGACACAUGGUCUACUUCU	2.52683	2.29299	2.35399	1.07342	1.07342
mmu-miR-1198_st	UAUGUGUUCCUGGCUGGCUUGG	2.28827	4.0999	3.75109	0.610029	-1.63927
mmu-miR-1199_st	UCUGAGUCCCGGUCGCGCGG	3.36352	2.14677	2.65518	1.26677	1.26677
mmu-miR-122_st	UGGAGUGUGACAAUGGUGUUUG	2.49725	2.36213	2.16942	1.15111	1.15111
mmu-miR-1224_st	GUGAGGACUGGGGAGGUGGAG	2.17555	15.5047	3.12135	0.69699	-1.43474
mmu-miR-124_st	UAAGGCACGCGGUGAAUGCC	44.5317	139.251	60.393	0.737365	-1.35618
mmu-miR-124-star_st	CGUGUUCACAGCGGACCUUGAU	2.11869	2.22282	2.57562	0.822593	-1.21567
mmu-miR-125a-3p_st	ACAGGUGAGGUUCUUGGGAGCC	3.15695	8.70835	2.32663	1.35688	1.35688
mmu-miR-125a-5p_st	UCCCUGAGACCCUUUAACCUGUGA	8.93217	24.0128	26.4761	0.337367	-2.96413
mmu-miR-125b-3p_st	ACGGGUUAGGCUCUUGGGAGCU	2.35381	4.04775	2.7875	0.844418	-1.18425
mmu-miR-125b-5p_st	UCCCUGAGACCCUAACUUGUGA	3.22807	61.2917	68.1518	0.0473658	-21.1123
mmu-miR-125b-star_st	ACAAGUCAGGUUCUUGGGACCU	3.10941	2.46135	2.17083	1.43236	1.43236
mmu-miR-126-3p_st	UCGUACCGUGAGUAAUAAUGCG	2.77458	2.60299	2.2461	1.23529	1.23529
mmu-miR-126-5p_st	CAUUAUUACUUUUGGUACGCG	2.99233	1.84301	2.11515	1.41471	1.41471
mmu-miR-127_st	UCGGAUCCGUCUGAGCUUGGCU	2.36392	7.27572	31.6162	0.0747693	-13.3745
mmu-miR-127-star_st	CUGAAGCUCAGAGGGCUCUGAU	2.37836	2.42405	2.94684	0.807089	-1.23902
mmu-miR-1274a_st	UCAGGUCCCUGUUCAGGCGCCA	3.31241	1.5894	2.32937	1.42202	1.42202
mmu-miR-128_st	UCACAGUGAACCGGUCUCUUU	2.57785	2.14677	2.35399	1.0951	1.0951
mmu-miR-129-3p_st	AAGCCCUUACCCCAAAAAGCAU	4.0999	2.74535	1.88617	2.17366	2.17366
mmu-miR-129-5p_st	CUUUUUGCGGUCUGGGCUUGC	2.04211	5.60654	2.37601	0.85947	-1.16351
mmu-miR-1306_st	ACGUUGGCUCUGGUGGUGAUG	2.14677	5.13844	3.13401	0.684992	-1.45987
mmu-miR-130a_st	CAGUGCAAUGUUAAAAGGGCAU	3.3284	8.41679	6.01298	0.553536	-1.80657
mmu-miR-130b_st	CAGUGCAAUGAUGAAAGGGCAU	3.54644	12.1758	11.2085	0.316406	-3.16049
mmu-miR-130b-star_st	ACUCUUUCCCUGUUGCACUACU	2.34972	2.50462	2.06138	1.13988	1.13988
mmu-miR-132_st	UAACAGUCUACAGCCAUGGUCG	3.29996	2.19507	2.35399	1.40186	1.40186
mmu-miR-133a_st	UUUGGUCCCCUUCAACCAGCUG	2.80362	2.8316	3.53723	0.792603	-1.26167
mmu-miR-133a-star_st	GCUGGUAAAAUGGAACCAAAU	2.00007	1.8524	3.06953	0.651587	-1.53471
mmu-miR-133b_st	UUUGGUCCCCUUCAACCAGCUA	2.32952	3.3523	1.79633	1.29682	1.29682
mmu-miR-134_st	UGUGACUGGUUGACCAGAGGGG	2.26713	5.74438	3.09016	0.733663	-1.36302
mmu-miR-135a_st	UAUGGCUUUUUAUUCCUAUGUGA	2.73289	2.2425	2.73289	1	1
mmu-miR-135a-star_st	UAUAGGGAUUGGAGCCGUGGCG	2.43201	3.73687	2.49671	0.974085	-1.0266
mmu-miR-135b_st	UAUGGCUUUUCAUUCCUAUGUGA	2.58225	1.98983	2.28978	1.12773	1.12773
mmu-miR-136_st	ACUCCAUUUGUUUUGAUGAUGG	2.37116	2.23488	2.0774	1.1414	1.1414
mmu-miR-136-star_st	AUCAUCGUCUCAAAUGAGUCUU	2.15855	1.68353	1.71291	1.26016	1.26016
mmu-miR-137_st	UUAUUGCUUAAGAAUACGCGUAG	2.02031	1.89511	2.68022	0.753788	-1.32663
mmu-miR-138_st	AGCUGGUGUUGUGAAUCAGGCCG	3.18815	8.60873	3.44456	0.925561	-1.08043
mmu-miR-138-star_st	CGGCUACUUCACAACACCAGGG	2.12573	3.09016	2.39458	0.887728	-1.12647
mmu-miR-139-3p_st	UGGAGACGCGGCCCUGUUGGAG	3.56902	2.47701	2.24876	1.58711	1.58711
mmu-miR-139-5p_st	UCUACAGUGCACGUGUCUCCAG	2.28786	3.2404	1.88222	1.21551	1.21551
mmu-miR-140_st	CAGUGGUUUUACCCUAUGGUAG	4.99755	3.00353	3.09016	1.61725	1.61725
mmu-miR-140-star_st	UACCACAGGGUAGAACCACGG	2.57785	2.7285	4.76244	0.541289	-1.84744
mmu-miR-141_st	UAACACUGUCUGGUAAAGAUGG	2.1509	2.29301	2.1082	1.02026	1.02026
mmu-miR-141-star_st	CAUCUUCCAGUGCAGUGUUGGA	2.53717	2.20552	2.26886	1.11826	1.11826
mmu-miR-142-3p_st	UGUAGUGUUUCCUACUUUAUGGA	2.35391	2.35391	2.65518	0.886535	-1.12799
mmu-miR-142-5p_st	CAUAAAGUAGAAAGCACUACU	2.01353	2.20244	2.89839	0.694709	-1.43945
mmu-miR-143_st	UGAGAUGAAGCACUGUAGCUC	2.70082	2.78591	2.14677	1.25809	1.25809
mmu-miR-144_st	UACAGUAUAGAUGAUGUACU	2.60676	2.44555	2.14419	1.21574	1.21574
mmu-miR-145_st	GUCCAGUUUUCCCAGGAAUCCCU	3.47497	3.40121	3.55052	0.978721	-1.02174
mmu-miR-145-star_st	AUUCCUGGAAAUACUGUUCUUG	2.11867	1.82199	2.83974	0.746079	-1.34034
mmu-miR-146a_st	UGAGAACUGAAUUCCAUGGGUU	2.85172	2.03061	2.5115	1.13546	1.13546
mmu-miR-146b_st	UGAGAACUGAAUUCCAUAGGCU	2.0474	1.87236	2.72867	0.750326	-1.33275
mmu-miR-146b-star_st	GCCCUAGGGACUCAGUUCUGGU	2.14677	1.98397	2.35399	0.911971	-1.09653
mmu-miR-147_st	GUGUGCGGAAAUGCUUCUGCUA	2.71306	2.34974	2.09234	1.29666	1.29666
mmu-miR-148a_st	UCAGUGCACUACAGAACUUUGU	2.78427	1.84529	2.35399	1.18279	1.18279
mmu-miR-148a-star_st	AAAGUUCUGAGACACUCCGACU	4.06251	3.06197	2.49049	1.63121	1.63121
mmu-miR-148b_st	UCAGUGCAUCACAGAACUUUGU	2.59301	2.1594	2.47603	1.04725	1.04725
mmu-miR-149_st	UCUGGCUCCGUGUCUUCACUCCC	2	14.7	15.546	0.128651	-7.77299
mmu-miR-150_st	UCUCCCAACCCUUGUACCAGUG	3.12098	2.50437	1.88222	1.65813	1.65813
mmu-miR-150-star_st	CUGGUACAGGCCUGGGGGAUAG	2.70581	3.40976	2.23282	1.21183	1.21183
mmu-miR-151-3p_st	CUAGACUGAGGCUCCUUGAGG	1.93874	2.23853	2.24028	0.865402	-1.15553
mmu-miR-151-5p_st	UCGAGGAGCUCACAGUCUAGU	2.09426	1.9339	6.80436	0.307782	-3.24905
mmu-miR-152_st	UCAGUGCAUGACAGAACUUGG	2.81792	1.53269	2.38303	1.18249	1.18249
mmu-miR-153_st	UUGCAUAGUCACAAAAGUGAUC	2.34218	2.40144	2.53151	0.925208	-1.08084
mmu-miR-154_st	UAGGUUAUCCGUGUUGCCUUCG	2.14677	2.55971	1.73761	1.23548	1.23548
mmu-miR-154-star_st	AAUCAUACACGGUUGACCUAUU	3.17312	2.56744	2.98723	1.06223	1.06223
mmu-miR-155_st	UUAAUGCUAAUUGUGAUAGGGGU	2.47997	2.47997	2.44995	1.01225	1.01225
mmu-miR-15a_st	UAGCAGCACAUAAUGGUUUGUG	3.08917	3.03696	2.66082	1.16099	1.16099
mmu-miR-15a-star_st	CAGGCCAUACUGUGCUGCCUCA	2.3782	2.3641	2.16457	1.09869	1.09869
mmu-miR-15b_st	UAGCAGCACAUCAUGGUUUACA	1.93054	2.96074	5.65442	0.341421	-2.92894
mmu-miR-15b-star_st	CGAAUCAUUAUUUGCUGCUCUA	2.23749	2.23749	1.99464	1.12175	1.12175
mmu-miR-16_st	UAGCAGCACGUAAAUAUUGGCG	6.27915	20.9763	23.7073	0.264861	-3.77556
mmu-miR-16-star_st	CCAGUAUUGACUGUGCUGCUGA	1.99022	1.86168	2.02947	0.980661	-1.01972
mmu-miR-17_st	CAAAGUGCUUACAGUGCAGGUAG	5.44179	17.9436	32.9542	0.165132	-6.05577
mmu-miR-17-star_st	ACUGCAGUGAGGGCACUUGUAG	2.78591	4.58531	2.74324	1.01556	1.01556
mmu-miR-181a_st	AACAUUCAACGCUGUCGGUGAGU	4.14974	43.177	43.442	0.0955235	-10.4686
mmu-miR-181a-1-star_st	ACCAUCGACCGUUGAUUGUACC	2.94981	1.91426	2.18232	1.35169	1.35169
mmu-miR-181a-2-star_st	ACCGACCGUUGACUGUACCUUG	1.96698	1.81792	2.61935	0.750941	-1.33166
mmu-miR-181b_st	AACAUUCAUUGCUGUCGGUGGGU	3.18188	20.4764	19.2216	0.165536	-6.04097
mmu-miR-181c_st	AACAUUCAACCUGUCGGUGAGU	2.1096	2.19386	2.79276	0.755383	-1.32383
mmu-miR-181d_st	AACAUUCAUUGUUGUCGGUGGGU	2.10417	21.3351	15.047	0.13984	-7.15102
mmu-miR-182_st	UUUGGCAAUGGUAGAACUCACACCG	2.94985	2.70654	1.99023	1.48217	1.48217
mmu-miR-183_st	UAUGGCACUGGUAGAAUUCACU	2.42876	2.08772	2.39479	1.01418	1.01418
mmu-miR-183-star_st	GUGAAUUACCGAAGGGCCAUAA	2.9573	1.83875	3.47774	0.850351	-1.17599
mmu-miR-1839-3p_st	AGACCUACUUAUCUACCAACAGC	2.68076	2.47387	4.0999	0.653858	-1.52938
mmu-miR-1839-5p_st	AAGGUAGAUAGAACAGGUCUUG	2.31965	2.18224	2.69905	0.859435	-1.16356
mmu-miR-184_st	UGGACGGAGAACUGAUAAGGGU	3.8025	2.34031	2.06977	1.83716	1.83716
mmu-miR-185_st	UGGAGAGAAAGGCAGUUCCUGA	3.18188	3.36422	3.03568	1.04816	1.04816
mmu-miR-186_st	CAAAGAAUUCUCCUUUUGGGCU	2.24851	2.24851	3.09016	0.727637	-1.37431
mmu-miR-186-star_st	GCCCUAAGGUGAAUUUUUUGGG	2.86084	2.14187	1.70605	1.67688	1.67688
mmu-miR-187_st	UCGUGUCUUGUGUUGCAGCCGG	2.22071	2.15669	2.48652	0.893098	-1.1197
mmu-miR-188-3p_st	CUCCCACAUGCAGGGUUUGCA	4.36723	2.78591	2.35399	1.85525	1.85525
mmu-miR-188-5p_st	CAUCCCUUGCAUGGUGGAGGG	1.84508	3.09016	1.90521	0.968443	-1.03259
mmu-miR-1892_st	AUUUGGGGACGGGAGGGAGGAU	3.18188	29.2909	3.4887	0.912053	-1.09643
mmu-miR-1893_st	GGCGCGGGCGCUGGACGCCUCG	2.0549	5.78517	9.40417	0.21851	-4.57645
mmu-miR-1894-3p_st	GCAAGGGAGAGGGUGAAGGGAG	2.1284	14.5385	3.47319	0.612809	-1.63183
mmu-miR-1894-5p_st	CUCUCCCCUACCACCUGCCUCU	4.21152	5.93155	4.0999	1.02722	1.02722
mmu-miR-1895_st	CCCCCGAGGAGGACGAGGAGGA	2.85334	4.75409	2.88624	0.988601	-1.01153
mmu-miR-1896_st	CUCUCUGAUGGUGGGUGAGGAG	1.84054	7.0561	1.88519	0.976315	-1.02426
mmu-miR-1897-3p_st	UCAACUCGUUCUGUCCGGUGAG	3.17426	1.96187	2.71918	1.16736	1.16736
mmu-miR-1897-5p_st	CUUUGGAUGGAGAAAGAGGGGG	2.18017	8.57882	2.74252	0.794952	-1.25794
mmu-miR-1898_st	AGGUCAAGGUUCACAGGGGAUC	3.58902	3.18585	2.62053	1.36958	1.36958
mmu-miR-1899_st	AGCGAUGGCCGAAUCUGCUUCC	2.30425	2.08324	2.10108	1.0967	1.0967
mmu-miR-18a_st	UAAGGUGCAUCUAGUGCAGAUAG	4.25733	4.13461	5.48564	0.776087	-1.28852
mmu-miR-18a-star_st	ACUGCCCUAAGUGCUCCUUCUG	2.8584	2.38998	2.41235	1.1849	1.1849
mmu-miR-18b_st	UAAGGUGCAUCUAGUGCUGUUAG	2.20632	2.24027	2.20632	1	1
mmu-miR-190_st	UGAUAUGUUUGAUAUAUUAGGU	2.11234	2.95337	2.47151	0.854676	-1.17003
mmu-miR-1900_st	GGCCGCCCUCUCUGGUCCUUCA	2.14227	2.12049	2.86239	0.74842	-1.33615
mmu-miR-1901_st	CCGCUCGUACUCCCGGGGGUCC	2.73805	2.20774	1.95915	1.39757	1.39757
mmu-miR-1902_st	AGAGGUGCAGUAGGCAUGACUU	2.23185	2.11838	2.46541	0.905264	-1.10465
mmu-miR-1903_st	CCUUCUUCUUCUUCCUGAGACA	1.86408	1.73707	1.70357	1.09423	1.09423
mmu-miR-1904_st	GUUCUGCUCCUCUGGAGGGAGG	2.15962	2.27687	1.89349	1.14055	1.14055
mmu-miR-1905_st	CACCAGUCCCACCACGCGGUAG	3.08797	1.96698	4.85123	0.636534	-1.57101
mmu-miR-1906_st	UGCAGCAGCCUGAGGCAGGGCU	2.1084	1.99022	2.1084	1	1
mmu-miR-1907_st	GAGCAGCAGAGGAUCUGGAGGU	2.77306	3.94422	2.68191	1.03399	1.03399
mmu-miR-190b_st	UGAUAUGUUUGAUAUUGGGUU	3.30539	2.78591	2.65518	1.24488	1.24488
mmu-miR-191_st	CAACGGAAUCCCAAAAGCAGCUG	3.0455	7.93049	9.94334	0.306286	-3.26493
mmu-miR-191-star_st	GCUGCACUUGGAUUUCGUUCCC	2.13991	2.79138	1.65012	1.29682	1.29682
mmu-miR-192_st	CUGACCUAUGAAUUGACAGCC	2.10446	1.90125	2.84193	0.740504	-1.35043
mmu-miR-1927_st	GACCUCUGGAUGUUAGGGACUGA	2.09461	2.52248	2.44555	0.856497	-1.16755
mmu-miR-1928_st	AGCUACAUUGCCAGCUC	2.18671	2.65518	1.9978	1.09456	1.09456
mmu-miR-1929_st	UUCUAGGACUUUAUAGAGCAGAG	2.47715	2.60915	1.87737	1.31948	1.31948
mmu-miR-193_st	AACUGGCCUACAAAGUCCCAGU	1.91775	1.9753	2.27985	0.841175	-1.18881
mmu-miR-193-star_st	UGGGUCUUUGCGGGCAAGAUGA	2.25165	1.87536	2.53851	0.886996	-1.1274
mmu-miR-1930_st	ACCUCCAUAGUACCUGCAGCGU	2.22254	2.1221	2.14677	1.03529	1.03529
mmu-miR-1931_st	AUGCAAGGGCUGGUGCGAUGGC	87.8335	26.3118	23.5183	3.73469	3.73469
mmu-miR-1932_st	GUUGCGGACAGCGCUAGGUCGG	2.14321	2.78128	2.65518	0.807179	-1.23888
mmu-miR-1933-3p_st	CCAGGACCAUCAGUGUGACUAU	2.31681	1.79403	2.25942	1.0254	1.0254
mmu-miR-1933-5p_st	AGUCAUGGUGUUCGGUCUUAGUUU	2.33812	5.03712	3.62367	0.645237	-1.54982
mmu-miR-1934_st	UCUGGUCCCCUGCUUCGUCCUCU	2.59892	4.2821	2.43397	1.06777	1.06777
mmu-miR-1935_st	AGGCAGAGGCUGGCGGAUCUCU	5.65125	4.94613	5.8473	0.966472	-1.03469
mmu-miR-1936_st	UAACUGACCUGCUGUGAACUGGC	1.93601	2.1664	2.49393	0.776288	-1.28818
mmu-miR-1937a_st	AAUCCCGGACGAGCCCCCA	3.20386	3.82715	3.33473	0.960755	-1.04085
mmu-miR-1937b_st	AUCCCGGACGAGCCCCCA	3.25783	3.5503	3.5503	0.917621	-1.08977
mmu-miR-1937c_st	AUCCCGGAAGAGCCCCCA	4.23476	3.25826	2.68009	1.58008	1.58008
mmu-miR-1938_st	CGGUGGGACUUGUAGUUCGGUC	2.40039	3.10562	1.64142	1.46238	1.46238
mmu-miR-1939_st	UCGAUUCCCUGCCAAUGCAC	2.27818	2.07521	1.92498	1.18348	1.18348
mmu-miR-193b_st	AACUGGCCCACAAAGUCCCGCU	2.57785	2.74567	3.54644	0.726885	-1.37573
mmu-miR-194_st	UGUAACAGCAACUCCAUGUGGA	1.99874	2.33487	2.57202	0.777112	-1.28682
mmu-miR-1940_st	AUGGAGGACUGAGAAGGUGGAGCAGUU	4.08241	15.8297	4.0999	0.995732	-1.00429
mmu-miR-1941-3p_st	CAUCUUAGCAGUAUCUCCCAU	2.28463	2.11531	2.00309	1.14055	1.14055
mmu-miR-1941-5p_st	AGGGAGAUGCUGGUACAGAGGCUU	3.15078	10.3398	3.66352	0.860043	-1.16273
mmu-miR-1942_st	UCAGAUGUCUUCAUCUGGUUG	3.25216	2.97094	2.72892	1.19174	1.19174
mmu-miR-1943_st	AAGGGAGGAUCUGGGCACCUGGA	2.90184	3.17105	1.50644	1.9263	1.9263
mmu-miR-1944_st	CUCUGUGCUGAAUGUCAAGUUCUGAUU	2.57359	2.2804	3.26262	0.78881	-1.26773
mmu-miR-1945_st	UCUUCGCGGGUACUGUCGGGAC	1.91118	1.98844	2.19698	0.869914	-1.14954
mmu-miR-1946a_st	AGCCGGGCAGUGGUGGCACACACUUUU	2.48236	2.08161	2.2071	1.12472	1.12472
mmu-miR-1946b_st	GCCGGGCAGUGGUGGCACAUGCUUUU	2.69512	2.87312	1.95037	1.38185	1.38185
mmu-miR-1947_st	AGGACGAGCUAGCUGAGUGCUG	2.14677	1.68767	1.88222	1.14055	1.14055
mmu-miR-1948_st	UUUAGGCAGAGCACUCGUACAG	2.17154	2.70431	2.98564	0.727329	-1.37489
mmu-miR-1949_st	CUAUACCAGGAUGUCAGCAUAGUU	3.08487	1.91453	2.36794	1.30277	1.30277
mmu-miR-195_st	UAGCAGCACAGAAAUAUUGGC	2.60532	2.48757	2.37909	1.09509	1.09509
mmu-miR-1950_st	UCUGCAUCUAAGGAUAUGGUCA	1.88931	1.86027	2.40507	0.785553	-1.27299
mmu-miR-1951_st	GUAGUGGAGACUGGUGUGGCUA	2.67415	5.71752	2.50194	1.06883	1.06883
mmu-miR-1952_st	UCUCCACCCUCCUUCUG	3.14101	2.06214	2.68881	1.16818	1.16818
mmu-miR-1953_st	UGGGAAAGUUCUCAGGCUUCUG	2.38748	2.38748	2.01817	1.18299	1.18299
mmu-miR-1954_st	ACUGCAGAGUGAGACCCUGUU	3.06354	2.55643	3.09016	0.991387	-1.00869
mmu-miR-1955_st	AGUCCCAGGAUGCACUGCAGCUUUU	2.98715	1.98647	1.85117	1.61365	1.61365
mmu-miR-1956_st	AGUCCAGGGCUGAGUCAGCGGA	1.84508	2.97836	1.81413	1.01706	1.01706
mmu-miR-1957_st	CAGUGGUAGAGCAUAUGAC	2.76326	1.83008	2.63359	1.04924	1.04924
mmu-miR-1958_st	UAGGAAAGUGGAAGCAGUAAGU	2.53434	3.29288	3.38147	0.749479	-1.33426
mmu-miR-1959_st	GGGGAUGUAGCUCAGUGGAG	2.05828	1.98276	2.35013	0.875816	-1.14179
mmu-miR-1960_st	CCAGUGCUGUUAGAAGAGGGCU	2.23861	2.82369	3.48481	0.642389	-1.55669
mmu-miR-1961_st	UGAGGUAGUAGUUAGAA	2.03646	1.90316	1.85689	1.0967	1.0967
mmu-miR-1962_st	AGAGGCUGGCACUGGGACACAU	2.42479	3.64781	2.97997	0.813695	-1.22896
mmu-miR-1963_st	UGGGACGAGAUCAUGAGGCCUUC	2.30544	2.23023	2.10525	1.09509	1.09509
mmu-miR-1964_st	CCGACUUCUGGGCUCCGGCUUU	3.56514	2.17091	2.41021	1.47918	1.47918
mmu-miR-1965_st	AAGCCGGGCCGUAGUGGCGCA	1.99428	2.28365	2.15097	0.927154	-1.07857
mmu-miR-1966_st	AAGGGAGCUGGCUCAGGAGAGAGUC	2.71712	4.02129	2.77181	0.980269	-1.02013
mmu-miR-1967_st	UGAGGAUCCUGGGGAGAAGAUGC	2.34821	2.76406	1.91237	1.2279	1.2279
mmu-miR-1968_st	UGCAGCUGUUAAGGAUGGUGGACU	2.44555	3.64518	1.90137	1.28621	1.28621
mmu-miR-1969_st	AAGAUGGAGACUUUAACAUGGGU	3.29388	2.39768	2.18636	1.50656	1.50656
mmu-miR-196a_st	UAGGUAGUUUCAUGUUGUUGGG	2.3206	3.0115	2.28591	1.01518	1.01518
mmu-miR-196a-star_st	UCGGCAACAAGAAACUGCCUGA	1.91777	2.29606	2.97222	0.645233	-1.54983
mmu-miR-196b_st	UAGGUAGUUUCCUGUUGUUGGG	1.96094	3.1455	2.20096	0.890952	-1.1224
mmu-miR-1970_st	UGUGUCACUGGGGAUAGGCUUUG	2.71709	4.47898	2.28014	1.19163	1.19163
mmu-miR-1971_st	GUAAAGGCUGGGCUGAGA	3.54644	4.07949	2.35399	1.50656	1.50656
mmu-miR-1981_st	GUAAAGGCUGGGCUUAGACGUGGC	3.19118	3.68157	3.23591	0.986178	-1.01402
mmu-miR-1982-star_st	UUGGGAGGGUCCUGGGGAGG	3.03711	8.30091	2.81954	1.07717	1.07717
mmu-miR-1982.1_st	UCUCACCCUAUGUUCUCCCACAG	3.00016	3.48399	2.36505	1.26854	1.26854
mmu-miR-1982.2_st	UCACCCUAUGUUCUCCCACAG	2.70264	2.44979	2.44642	1.10473	1.10473
mmu-miR-1983_st	CUCACCUGGAGCAUGUUUUCU	3.19685	2.36392	2.83294	1.12846	1.12846
mmu-miR-199a-3p_st	ACAGUAGUCUGCACAUUGGUUA	2.25468	2.28827	2.34712	0.960615	-1.041
mmu-miR-199a-5p_st	CCCAGUGUUCAGACUACCUGUUC	2.6675	2.46135	2.18625	1.22013	1.22013
mmu-miR-199b_st	ACAGUAGUCUGCACAUUGGUUA	2.13872	2.00646	1.79299	1.19283	1.19283
mmu-miR-199b-star_st	CCCAGUGUUUAGACUACCUGUUC	3.64518	2.09246	2.38105	1.53091	1.53091
mmu-miR-19a_st	UGUGCAAAUCUAUGCAAAACUGA	2.97069	2.00907	2.49902	1.18875	1.18875
mmu-miR-19a-star_st	UAGUUUUGCAUAGUUGCACUAC	4.3663	2.47536	2.06201	2.1175	2.1175
mmu-miR-19b_st	UGUGCAAAUCCAUGCAAAACUGA	2.57723	2.07806	2.75842	0.934314	-1.0703
mmu-miR-200a_st	UAACACUGUCUGGUAACGAUGU	2.9217	1.97907	3.25645	0.897205	-1.11457
mmu-miR-200a-star_st	CAUCUUACCGGACAGUGCUGGA	2.85876	2.12923	2.71372	1.05345	1.05345
mmu-miR-200b_st	UAAUACUGCCUGGUAAUGAUGA	3.0697	3.51952	4.23112	0.725506	-1.37835
mmu-miR-200b-star_st	CAUCUUACUGGGCAGCAUUGGA	2.29108	2.21795	2.266	1.01107	1.01107
mmu-miR-200c_st	UAAUACUGCCGGGUAAUGAUGGA	1.79807	1.99747	2.15541	0.834213	-1.19873
mmu-miR-200c-star_st	CGUCUUACCCAGCAGUGUUUGG	2.78591	2.63465	2.73297	1.01937	1.01937
mmu-miR-201_st	UACUCAGUAAGGCAUUGUUCUU	2.01083	2.1578	2.48447	0.809358	-1.23555
mmu-miR-202-3p_st	AGAGGUAUAGCGCAUGGGAAGA	1.93321	2.57891	2.58043	0.749182	-1.33479
mmu-miR-202-5p_st	UUCCUAUGCAUAUACUUCUUU	2.8891	2.47231	2.15633	1.33982	1.33982
mmu-miR-203_st	GUGAAAUGUUUAGGACCACUAG	4.06716	2.14092	2.38838	1.7029	1.7029
mmu-miR-203-star_st	AGUGGUUCUUGACAGUUCAACA	2.30638	1.8352	2.48759	0.927153	-1.07857
mmu-miR-204_st	UUCCCUUUGUCAUCCUAUGCCU	4.27508	2.3283	3.51306	1.21691	1.21691
mmu-miR-205_st	UCCUUCAUUCCACCGGAGUCUG	2.46659	2.14677	1.88222	1.31047	1.31047
mmu-miR-206_st	UGGAAUGUAAGGAAGUGUGUGG	2.15877	3.61464	2.34091	0.922193	-1.08437
mmu-miR-207_st	GCUUCUCCUGGCUCUCCUCCCUC	3.05716	7.33283	2.40377	1.27182	1.27182
mmu-miR-208a_st	AUAAGACGAGCAAAAAGCUUGU	2.57785	2.66327	3.54644	0.726885	-1.37573
mmu-miR-208b_st	AUAAGACGAACAAAAGGUUUGU	2.27676	2.14677	3.89208	0.584972	-1.70948
mmu-miR-20a_st	UAAAGUGCUUAUAGUGCAGGUAG	2.27204	4.90084	14.6213	0.155393	-6.43531
mmu-miR-20a-star_st	ACUGCAUUACGAGCACUUAAAG	2.5905	2.24532	2.60534	0.994305	-1.00573
mmu-miR-20b_st	CAAAGUGCUCAUAGUGCAGGUAG	2.12915	2.60801	2.65518	0.801887	-1.24706
mmu-miR-20b-star_st	ACUGCAGUGUGAGCACUUCUAG	2.15849	2.17233	2.03812	1.05906	1.05906
mmu-miR-21_st	UAGCUUAUCAGACUGAUGUUGA	2.36767	2.35148	2.25015	1.05223	1.05223
mmu-miR-21-star_st	CAACAGCAGUCGAUGGGCUGUC	2.82474	1.67434	3.09016	0.91411	-1.09396
mmu-miR-210_st	CUGUGCGUGUGACAGCGGCUGA	2.78591	2.22904	2.35399	1.18348	1.18348
mmu-miR-211_st	UUCCCUUUGUCAUCCUUUGCCU	2.70298	7.02686	4.46531	0.605328	-1.652
mmu-miR-212_st	UAACAGUCUCCAGUCACGGCCA	2.37553	2.06312	2.41347	0.98428	-1.01597
mmu-miR-2132_st	GGCGGGUGUUGACGCGAUG	2.18089	2.93707	3.7862	0.576012	-1.73608
mmu-miR-2133_st	GUCCCGCGGGGCCCGAAGCGUU	2.6373	4.08663	4.53292	0.58181	-1.71877
mmu-miR-2134_st	GUCUUGGGAAACGGGGUGC	3.34983	6.37988	2.54631	1.31556	1.31556
mmu-miR-2135_st	AGAGGUCUUGGGGCCGAAAC	2.36475	2.31561	3.66497	0.645232	-1.54983
mmu-miR-2136_st	CUGGGUGUUGACUGAGAUGUG	2.3286	2.835	1.84138	1.26459	1.26459
mmu-miR-2137_st	GCCGGCGGGAGCCCCAGGGAG	3.54644	2.14719	2.73944	1.29459	1.29459
mmu-miR-2138_st	AAGGGAACGGGCUUGGCGGAAU	2.78943	3.84254	7.10089	0.392828	-2.54564
mmu-miR-2139_st	AGCUGCGCUGCUCCUGGUAACUGC	2.20204	1.99827	2.03314	1.08307	1.08307
mmu-miR-214_st	ACAGCAGGCACAGACAGGCAGU	2.61988	3.86484	2.28281	1.14766	1.14766
mmu-miR-214-star_st	UGCCUGUCUACACUUGCUGUGC	2.08031	2.80327	1.70748	1.21835	1.21835
mmu-miR-2140_st	AGGUGCAGAUCUUGGUGGU	57.6489	23.521	16.9187	3.4074	3.4074
mmu-miR-2141_st	AGGAGGUGUCAGAAAAGUU	5.33408	3.53377	5.08374	1.04924	1.04924
mmu-miR-2145_st	AGCAGGGUCGGGCCUGGUU	2.65927	10.432	8.59412	0.309429	-3.23176
mmu-miR-2146_st	GUGGAGAAGGGUUCCAUGUG	99.7815	99.0043	18.3322	5.44295	5.44295
mmu-miR-215_st	AUGACCUAUGAUUUGACAGAC	2.78591	2.46135	2.75788	1.01016	1.01016
mmu-miR-216a_st	UAAUCUCAGCUGGCAACUGUGA	3.17149	1.75842	2.41824	1.31148	1.31148
mmu-miR-216b_st	AAAUCUCUGCAGGCAAAUGUGA	2.14677	1.76796	2.21243	0.970325	-1.03058
mmu-miR-217_st	UACUGCAUCAGGAACUGACUGGA	2.20373	2.16594	2.67717	0.823157	-1.21483
mmu-miR-218_st	UUGUGCUUGAUCUAACCAUGU	2.63196	2.20181	2.05184	1.28273	1.28273
mmu-miR-218-1-star_st	AAACAUGGUUCCGUCAAGCACC	2.97733	2.29764	3.60265	0.826427	-1.21003
mmu-miR-218-2-star_st	CAUGGUUCUGUCAAGCACCGCG	2.07704	1.96698	2.65518	0.78226	-1.27835
mmu-miR-2182_st	ACGCCACAUUUCCCACGCCGCG	2.20564	3.94356	2.82986	0.779418	-1.28301
mmu-miR-2183_st	UUGAACCCCUGACCUCCU	2.93191	3.45204	2.55469	1.14766	1.14766
mmu-miR-219_st	UGAUUGUCCAAACGCAAUUCU	2.65531	1.91303	2.02312	1.31248	1.31248
mmu-miR-22_st	AAGCUGCCAGUUGAAGAACUGU	2.91497	2.87	4.55162	0.640424	-1.56146
mmu-miR-22-star_st	AGUUCUUCAGUGGCAAGCUUUA	1.96698	2.11927	3.02411	0.650433	-1.53744
mmu-miR-220_st	CCACCACAGUGUCAGACACUU	2.28827	1.90276	2.35399	0.972082	-1.02872
mmu-miR-221_st	AGCUACAUUGUCUGCUGGGUUUC	2.12099	3.60973	2.67254	0.793625	-1.26004
mmu-miR-222_st	AGCUACAUCUGGCUACUGGGU	1.81504	2.081	1.88452	0.963134	-1.03828
mmu-miR-223_st	UGUCAGUUUGUCAAAUACCCCA	3.59659	1.94325	4.27238	0.841824	-1.1879
mmu-miR-224_st	UAAGUCACUAGUGGUUCCGUU	2.29996	2.19202	2.08632	1.1024	1.1024
mmu-miR-23a_st	AUCACAUUGCCAGGGAUUUCC	3.06554	2.21089	3.34575	0.916248	-1.09141
mmu-miR-23b_st	AUCACAUUGCCAGGGAUUACC	2.50663	5.10457	9.47779	0.264474	-3.78108
mmu-miR-24_st	UGGCUCAGUUCAGCAGGAACAG	3.29896	3.46076	3.29896	1	1
mmu-miR-24-1-star_st	GUGCCUACUGAGCUGAUAUCAGU	1.90562	2.40139	1.85779	1.02575	1.02575
mmu-miR-24-2-star_st	GUGCCUACUGAGCUGAAACAGU	2.17219	2.24836	2.42541	0.895596	-1.11657
mmu-miR-25_st	CAUUGCACUUGUCUCGGUCUGA	2.07077	3.83863	3.63066	0.570358	-1.75328
mmu-miR-26a_st	UUCAAGUAAUCCAGGAUAGGCU	3.1756	19.4782	18.2979	0.17355	-5.76204
mmu-miR-26b_st	UUCAAGUAAUUCAGGAUAGGU	3.31277	2.7755	2.07834	1.59395	1.59395
mmu-miR-26b-star_st	CCUGUUCUCCAUUACUUGGCUC	2.27706	2.43036	2.32437	0.979644	-1.02078
mmu-miR-27a_st	UUCACAGUGGCUAAGUUCCGC	2.14677	2.23721	1.89037	1.13564	1.13564
mmu-miR-27a-star_st	AGGGCUUAGCUGCUUGUGAGCA	2.78591	2.28827	2.45059	1.13683	1.13683
mmu-miR-27b_st	UUCACAGUGGCUAAGUUCUGC	2.65881	1.90216	2.44262	1.08851	1.08851
mmu-miR-27b-star_st	AGAGCUUAGCUGAUUGGUGAAC	1.96698	2.14677	1.85084	1.06275	1.06275
mmu-miR-28_st	AAGGAGCUCACAGUCUAUUGAG	2.0312	2.06643	2.24421	0.905082	-1.10487
mmu-miR-28-star_st	CACUAGAUUGUGAGCUGCUGGA	2.65877	2.3977	2.2384	1.1878	1.1878
mmu-miR-2861_st	GGGGCCUGGCGGCGGGCGG	8.05363	7.35105	12.4527	0.646737	-1.54622
mmu-miR-290-3p_st	AAAGUGCCGCCUAGUUUUAAGCCC	3.29578	2.1344	4.42213	0.745293	-1.34175
mmu-miR-290-5p_st	ACUCAAACUAUGGGGGCACUUU	2.53782	3.48353	2.38087	1.06592	1.06592
mmu-miR-291a-3p_st	AAAGUGCUUCCACUUUGUGUGC	2.24614	2.28827	2.61781	0.858024	-1.16547
mmu-miR-291a-5p_st	CAUCAAAGUGGAGGCCCUCUCU	1.99489	2.2967	2.30616	0.865028	-1.15603
mmu-miR-291b-3p_st	AAAGUGCAUCCAUUUUGUUUGU	2.61623	2.61623	2.26003	1.15761	1.15761
mmu-miR-291b-5p_st	GAUCAAAGUGGAGGCCCUCUCC	2.99042	2.65518	3.80678	0.785553	-1.27299
mmu-miR-292-3p_st	AAAGUGCCGCCAGGUUUUGAGUGU	3.09541	2.28827	2.64063	1.17223	1.17223
mmu-miR-292-5p_st	ACUCAAACUGGGGGCUCUUUUG	3.55106	2.91363	3.39097	1.04721	1.04721
mmu-miR-293_st	AGUGCCGCAGAGUUUGUAGUGU	1.90101	4.37057	2.14677	0.88552	-1.12928
mmu-miR-293-star_st	ACUCAAACUGUGUGACAUUUUG	2.13675	1.89673	3.06645	0.696816	-1.4351
mmu-miR-294_st	AAAGUGCUUCCCUUUUGUGUGU	2.19777	2.89626	3.96555	0.554216	-1.80435
mmu-miR-294-star_st	ACUCAAAAUGGAGGCCCUAUCU	1.95801	1.7316	1.98347	0.987166	-1.013
mmu-miR-295_st	AAAGUGCUACUACUUUUGAGUCU	2.73394	2.06057	2.34676	1.16498	1.16498
mmu-miR-295-star_st	ACUCAAAUGUGGGGCACACUUC	2.20926	2.2164	3.54644	0.622951	-1.60526
mmu-miR-296-3p_st	GAGGGUUGGGUGGAGGCUCUCC	2.77055	8.27718	2.2711	1.21991	1.21991
mmu-miR-296-5p_st	AGGGCCCCCCCUCAAUCCUGU	5.2187	2.10459	3.83496	1.36082	1.36082
mmu-miR-297a_st	AUGUAUGUGUGCAUGUGCAUGU	3.00399	4.59648	2.80399	1.07133	1.07133
mmu-miR-297a-star_st	UAUACAUACACACAUACCCAUA	2.37757	8.87902	2.67676	0.888227	-1.12584
mmu-miR-297b-3p_st	UAUACAUACACACAUACCCAUA	2.62581	6.41785	3.79487	0.691936	-1.44522
mmu-miR-297b-5p_st	AUGUAUGUGUGCAUGAACAUGU	1.89245	2.94956	2.17734	0.869156	-1.15054
mmu-miR-297c_st	AUGUAUGUGUGCAUGUACAUGU	2.93534	2.60801	2.19765	1.33568	1.33568
mmu-miR-297c-star_st	UAUACAUACACACAUACCCAUA	2.1907	8.96964	2.97022	0.737554	-1.35583
mmu-miR-298_st	GGCAGAGGAGGGCUGUUCUUCCC	2.28827	3.32126	3.56159	0.642487	-1.55645
mmu-miR-299_st	UAUGUGGGACGGUAAACCGCUU	2.86203	1.89261	2.4884	1.15015	1.15015
mmu-miR-299-star_st	UGGUUUACCGUCCCACAUACAU	2.32392	2.96128	2.83632	0.819343	-1.22049
mmu-miR-29a_st	UAGCACCAUCUGAAAUCGGUUA	1.66299	2.31697	2.57735	0.645232	-1.54983
mmu-miR-29a-star_st	ACUGAUUUCUUUUGGUGUUCAG	2.49089	2.78591	2.15732	1.15462	1.15462
mmu-miR-29b_st	UAGCACCAUUUGAAAUCAGUGUU	1.69889	2.3487	2.37263	0.716036	-1.39658
mmu-miR-29b-star_st	GCUGGUUUCAUAUGGUGGUUUA	2.04303	2.27519	1.955	1.04503	1.04503
mmu-miR-29c_st	UAGCACCAUUUGAAAUCGGUUA	2.78591	2.45525	2.38323	1.16896	1.16896
mmu-miR-29c-star_st	UGACCGAUUUCUCCUGGUGUUC	2.11823	2.66591	3.32778	0.63653	-1.57102
mmu-miR-300_st	UAUGCAAGGGCAAGCUCUCUUC	2.28827	3.54644	11.2085	0.204155	-4.89823
mmu-miR-300-star_st	UUGAAGAGAGGUUAUCCUUUGU	2.41637	2.51546	2.41637	1	1
mmu-miR-301a_st	CAGUGCAAUAGUAUUGUCAAAGC	2.84853	3.82574	3.82527	0.744663	-1.34289
mmu-miR-301b_st	CAGUGCAAUGGUAUUGUCAAAGC	2.87318	2.38242	4.99845	0.574815	-1.73969
mmu-miR-302a_st	UAAGUGCUUCCAUGUUUUGGUGA	2.28827	2.93846	2.08305	1.09852	1.09852
mmu-miR-302a-star_st	ACUUAAACGUGGUUGUACUUGC	2.34892	2.32569	2.13988	1.09769	1.09769
mmu-miR-302b_st	UAAGUGCUUCCAUGUUUUAGUAG	2.84343	2.11685	2.24981	1.26385	1.26385
mmu-miR-302b-star_st	ACUUUAACAUGGGAAUGCUUUCU	2.4643	2.85264	2.29843	1.07217	1.07217
mmu-miR-302c_st	AAGUGCUUCCAUGUUUCAGUGG	3.45786	2.14779	2.05152	1.68552	1.68552
mmu-miR-302c-star_st	GCUUUAACAUGGGGUUACCUGC	2.00875	1.73975	2.29751	0.874318	-1.14375
mmu-miR-302d_st	UAAGUGCUUCCAUGUUUGAGUGU	3.30342	2.96911	2.10118	1.57217	1.57217
mmu-miR-3072_st	UGCCCCCUCCAGGAAGCCUUCU	4.0999	2.92758	4.21295	0.973167	-1.02757
mmu-miR-3072-star_st	AGGGACCCCGAGGGAGGGCAGG	3.27143	5.97737	4.62743	0.706965	-1.4145
mmu-miR-3099_st	UAGGCUAGAGAGAGGUUGGGGA	2.74706	7.32181	5.09351	0.539326	-1.85417
mmu-miR-3099-star_st	CCAGCUUCCUUCCAGCCCUUG	2.33955	2.90005	2.40971	0.970883	-1.02999
mmu-miR-30a_st	UGUAAACAUCCUCGACUGGAAG	2.0966	2.97302	3.01793	0.694713	-1.43944
mmu-miR-30a-star_st	CUUUCAGUCGGAUGUUUGCAGC	2.28686	1.718	2.35546	0.970877	-1.03
mmu-miR-30b_st	UGUAAACAUCCUACACUCAGCU	2.27805	2.82525	2.54143	0.896366	-1.11562
mmu-miR-30b-star_st	CUGGGAUGUGGAUGUUUACGUC	1.599	3.69783	2.3961	0.667334	-1.4985
mmu-miR-30c_st	UGUAAACAUCCUACACUCUCAGC	1.53329	7.72679	5.46943	0.280338	-3.56712
mmu-miR-30c-1-star_st	CUGGGAGAGGGUUGUUUACUCC	2.16906	3.70818	1.72321	1.25874	1.25874
mmu-miR-30c-2-star_st	CUGGGAGAAGGCUGUUUACUCU	2.02817	1.88907	2.80255	0.723688	-1.38181
mmu-miR-30d_st	UGUAAACAUCCCCGACUGGAAG	2.99993	2.94848	3.31454	0.905082	-1.10487
mmu-miR-30e_st	UGUAAACAUCCUUGACUGGAAG	2.09808	2.02916	2.24196	0.935825	-1.06858
mmu-miR-30e-star_st	CUUUCAGUCGGAUGUUUACAGC	2.22431	1.78075	2.05372	1.08307	1.08307
mmu-miR-31_st	AGGCAAGAUGCUGGCAUAGCUG	2.13356	2.29869	2.88594	0.739294	-1.35264
mmu-miR-31-star_st	UGCUAUGCCAACAUAUUGCCAUC	2.82578	2.37336	2.44431	1.15606	1.15606
mmu-miR-32_st	UAUUGCACAUUACUAAGUUGCA	2.50175	2.65518	2.59721	0.963249	-1.03815
mmu-miR-320_st	AAAAGCUGGGUUGAGAGGGCGA	2.5699	13.1184	7.94672	0.323391	-3.09224
mmu-miR-322_st	CAGCAGCAAUUCAUGUUUUGGA	3.01755	2.61766	2.14536	1.40655	1.40655
mmu-miR-322-star_st	AAACAUGAAGCGCUGCAACAC	2.79212	2.52582	2.43777	1.14536	1.14536
mmu-miR-323-3p_st	CACAUUACACGGUCGACCUCU	2.76533	1.82594	2.19442	1.26016	1.26016
mmu-miR-323-5p_st	AGGUGGUCCGUGGCGCGUUCGC	2.48454	2.28827	2.5559	0.972082	-1.02872
mmu-miR-324-3p_st	CCACUGCCCCAGGUGCUGCU	3.10631	2.71976	2.46036	1.26254	1.26254
mmu-miR-324-5p_st	CGCAUCCCCUAGGGCAUUGGUGU	2.76999	3.68619	3.38175	0.819099	-1.22085
mmu-miR-325_st	UUUAUUGAGCACCUCCUAUCAA	4.05249	2.72085	2.4773	1.63585	1.63585
mmu-miR-325-star_st	CCUAGUAGGUGCUCAGUAAGUGU	2.24222	2.50907	2.17597	1.03045	1.03045
mmu-miR-326_st	CCUCUGGGCCCUUCCUCCAGU	2.6659	3.86225	2.23341	1.19364	1.19364
mmu-miR-327_st	ACUUGAGGGGCAUGAGGAU	2.65675	3.34603	1.92171	1.38249	1.38249
mmu-miR-328_st	CUGGCCCUCUCUGCCCUUCCGU	4.41612	3.86659	2.60099	1.69786	1.69786
mmu-miR-329_st	AACACACCCAGCUAACCUUUUU	2.87358	6.00353	4.76244	0.603385	-1.65732
mmu-miR-33_st	GUGCAUUGUAGUUGCAUUGCA	2.13809	2.20506	2.15115	0.993926	-1.00611
mmu-miR-33-star_st	CAAUGUUUCCACAGUGCAUCAC	2.26028	2.25393	2.93879	0.76912	-1.30019
mmu-miR-330_st	UCUCUGGGCCUGUGUCUUAGGC	2.02753	2.92641	2.23788	0.906004	-1.10375
mmu-miR-330-star_st	GCAAAGCACAGGGCCUGCAGAGA	3.07433	2.06104	2.283	1.34662	1.34662
mmu-miR-331-3p_st	GCCCCUGGGCCUAUCCUAGAA	2.28827	2.28827	2.75599	0.830292	-1.2044
mmu-miR-331-5p_st	CUAGGUAUGGUCCCAGGGAUCC	1.98171	2.01065	2.46589	0.803649	-1.24432
mmu-miR-335-3p_st	UUUUUCAUUAUUGCUCCUGACC	2.32593	2.78591	1.81444	1.2819	1.2819
mmu-miR-335-5p_st	UCAAGAGCAAUAACGAAAAAUGU	3.28684	2.62896	3.82182	0.860019	-1.16277
mmu-miR-337-3p_st	UUCAGCUCCUAUAUGAUGCCU	2.44952	2.15091	2.42856	1.00863	1.00863
mmu-miR-337-5p_st	GAACGGCGUCAUGCAGGAGUU	2.41898	2.78784	2.17499	1.11218	1.11218
mmu-miR-338-3p_st	UCCAGCAUCAGUGAUUUUGUUG	2.57059	2.73564	2.04815	1.25508	1.25508
mmu-miR-338-5p_st	AACAAUAUCCUGGUGCUGAGUG	1.88555	2.69323	3.08765	0.610674	-1.63754
mmu-miR-339-3p_st	UGAGCGCCUCGGCGACAGAGCCG	2.33538	2.2637	2.15239	1.08502	1.08502
mmu-miR-339-5p_st	UCCCUGUCCUCCAGGAGCUCACG	1.77212	2.87545	2.50797	0.706594	-1.41524
mmu-miR-340-3p_st	UCCGUCUCAGUUACUUUAUAGC	2.31803	1.99479	2.00255	1.15754	1.15754
mmu-miR-340-5p_st	UUAUAAAGCAAUGAGACUGAUU	2.24207	2.87687	2.51227	0.892448	-1.12051
mmu-miR-341_st	UCGGUCGAUCGGUCGGUCGGU	2.28827	1.96698	2.35399	0.972082	-1.02872
mmu-miR-342-3p_st	UCUCACACAGAAAUCGCACCCGU	3.25697	15.3249	17.8407	0.182558	-5.4777
mmu-miR-342-5p_st	AGGGGUGCUAUCUGUGAUUGAG	2.42925	5.046	2.50212	0.970877	-1.03
mmu-miR-343_st	UCUCCCUUCAUGUGCCCAGA	2.26798	2.96005	3.38016	0.67097	-1.49038
mmu-miR-344_st	UGAUCUAGCCAAAGCCUGACUGU	3.68816	3.46309	2.65518	1.38904	1.38904
mmu-miR-345-3p_st	CCUGAACUAGGGGUCUGGAGAC	2.42632	3.02329	2.54215	0.954436	-1.04774
mmu-miR-345-5p_st	GCUGACCCCUAGUCCAGUGCUU	3.18188	3.5136	3.965	0.802493	-1.24612
mmu-miR-346_st	UGUCUGCCCGAGUGCCUGCCUCU	2.71829	2.46135	3.3986	0.799827	-1.25027
mmu-miR-3470a_st	UCACUUUGUAGACCAGGCUGG	1.94042	2.44438	2.01062	0.965086	-1.03618
mmu-miR-3470b_st	UCACUCUGUAGACCAGGCUGG	2.14637	2.07475	2.12855	1.00837	1.00837
mmu-miR-3471_st	UGAGAUCCAACUGUAAGGCAUU	3.78948	2.67554	2.92209	1.29684	1.29684
mmu-miR-3472_st	UAAUAGCCAGAAGCUGGAAGGAACC	2.71537	3.92774	3.52108	0.771175	-1.29672
mmu-miR-3473_st	UGGAGAGAUGGCUCAGCC	2.86205	2.9775	2.59695	1.10208	1.10208
mmu-miR-3474_st	CCCUGGGAGGAGACGUGGAUUC	2.17947	3.92957	2.65518	0.820838	-1.21827
mmu-miR-3475_st	UCUGGAGGCACAUGGUUUGAA	2.48616	3.07494	2.03251	1.2232	1.2232
mmu-miR-34a_st	UGGCAGUGUCUUAGCUGGUUGU	2.51591	2.54903	1.96423	1.28087	1.28087
mmu-miR-34b-3p_st	AAUCACUAACUCCACUGCCAUC	3.29978	8.0025	3.89043	0.848179	-1.179
mmu-miR-34b-5p_st	AGGCAGUGUAAUUAGCUGAUUGU	2.82831	2.09233	2.0038	1.41147	1.41147
mmu-miR-34c_st	AGGCAGUGUAGUUAGCUGAUUGC	2.90184	2.1305	2.03869	1.42339	1.42339
mmu-miR-34c-star_st	AAUCACUAACCACACAGCCAGG	3.92646	5.5547	2.10258	1.86745	1.86745
mmu-miR-350_st	UUCACAAAGCCCAUACACUUUC	3.15618	2.48318	3.51526	0.897852	-1.11377
mmu-miR-351_st	UCCCUGAGGAGCCCUUUGAGCCUG	3.76544	3.09074	2.544	1.48013	1.48013
mmu-miR-361_st	UUAUCAGAAUCUCCAGGGGUAC	2.44971	3.83296	5.40551	0.453188	-2.20659
mmu-miR-362-3p_st	AACACACCUGUUCAAGGAUUCA	3.81314	2.68444	2.51842	1.5141	1.5141
mmu-miR-362-5p_st	AAUCCUUGGAACCUAGGUGUGAAU	2.48692	2.89355	2.66906	0.93176	-1.07324
mmu-miR-363_st	AAUUGCACGGUAUCCAUCUGUA	2.49358	2.28827	2.14677	1.16155	1.16155
mmu-miR-365_st	UAAUGCCCCUAAAAAUCCUUAU	2.58014	2.75059	4.75264	0.542886	-1.84201
mmu-miR-367_st	AAUUGCACUUUAGCAAUGGUGA	3.00541	2.04452	2.25893	1.33046	1.33046
mmu-miR-369-3p_st	AAUAAUACAUGGUUGAUCUUU	2.4882	2.22675	2.72839	0.911965	-1.09653
mmu-miR-369-5p_st	AGAUCGACCGUGUUAUAUUCGC	2.22425	2.08641	2.97434	0.747813	-1.33723
mmu-miR-370_st	GCCUGCUGGGGUGGAACCUGGU	2.24574	3.69542	4.65329	0.482613	-2.07205
mmu-miR-374_st	AUAUAAUACAACCUGCUAAGUG	2.8064	2.65916	3.09016	0.908174	-1.10111
mmu-miR-374-star_st	GGUUGUAUUAUCAUUGUCCGAG	2.41746	1.98563	2.29123	1.05509	1.05509
mmu-miR-375_st	UUUGUUCGUUCGGCUCGCGUGA	2.14677	1.99109	2.39451	0.89654	-1.1154
mmu-miR-376a_st	AUCGUAGAGGAAAAUCCACGU	3.03469	2.83447	6.40634	0.473701	-2.11103
mmu-miR-376a-star_st	GGUAGAUUCUCCUUCUAUGAGU	2.22704	1.62246	2.50335	0.889625	-1.12407
mmu-miR-376b_st	AUCAUAGAGGAACAUCCACUU	2.78591	2.56255	3.99191	0.697889	-1.43289
mmu-miR-376b-star_st	GUGGAUAUUCCUUCUAUGGUUA	2.08719	1.79412	2.18845	0.953728	-1.04852
mmu-miR-376c_st	AACAUAGAGGAAAUUUCACGU	2.75576	2.68628	2.14677	1.28368	1.28368
mmu-miR-376c-star_st	GUGGAUAUUCCUUCUAUGUUUA	2.22251	1.92706	2.08421	1.06636	1.06636
mmu-miR-377_st	AUCACACAAAGGCAACUUUUGU	3.74213	2.4584	3.87528	0.965642	-1.03558
mmu-miR-378_st	ACUGGACUUGGAGUCAGAAGG	2.01957	2.35	1.93298	1.0448	1.0448
mmu-miR-378-star_st	CUCCUGACUCCAGGUCCUGUGU	1.89341	2.90716	2.06281	0.917879	-1.08947
mmu-miR-379_st	UGGUAGACUAUGGAACGUAGG	2.07385	10.0427	2.80059	0.740504	-1.35043
mmu-miR-380-3p_st	UAUGUAGUAUGGUCCACAUCUU	2.38175	1.68332	2.14677	1.10945	1.10945
mmu-miR-380-5p_st	AUGGUUGACCAUAGAACAUGCG	1.96698	1.74668	3.23389	0.60824	-1.64409
mmu-miR-381_st	UAUACAAGGGCAAGCUCUCUGU	2.52048	2.52048	2.59287	0.972082	-1.02872
mmu-miR-382_st	GAAGUUGUUCGUGGUGGAUUCG	2.61881	27.4832	10.9475	0.239215	-4.18034
mmu-miR-382-star_st	UCAUUCACGGACAACACUUUUU	3.08322	3.08322	2.5829	1.19371	1.19371
mmu-miR-383_st	AGAUCAGAAGGUGACUGUGGCU	1.98572	2.40084	2.7873	0.712417	-1.40367
mmu-miR-384-3p_st	AUUCCUAGAAAUUGUUCACAAU	2.23671	2.38449	2.60243	0.85947	-1.16351
mmu-miR-384-5p_st	UGUAAACAAUUCCUAGGCAAUGU	2.95957	2.14677	2.64704	1.11807	1.11807
mmu-miR-409-3p_st	GAAUGUUGCUCGGUGAACCCCU	4.61535	4.50776	10.154	0.454537	-2.20004
mmu-miR-409-5p_st	AGGUUACCCGAGCAACUUUGCAU	1.98513	2.17156	4.3138	0.460181	-2.17306
mmu-miR-410_st	AAUAUAACACAGAUGGCCUGU	3.31046	2.98777	3.72332	0.889114	-1.12472
mmu-miR-411_st	UAGUAGACCGUAUAGCGUACG	3.18188	3.36422	3.61015	0.88137	-1.1346
mmu-miR-411-star_st	UAUGUAACACGGUCCACUAACC	2.51445	2.78904	3.16835	0.793614	-1.26006
mmu-miR-412_st	UUCACCUGGUCCACUAGCCG	2.28827	2.00501	2.18827	1.0457	1.0457
mmu-miR-421_st	AUCAACAGACAUUAAUUGGGCGC	4.35804	2.28827	3.09016	1.4103	1.4103
mmu-miR-423-3p_st	AGCUCGGUCUGAGGCCCCUCAGU	2.52697	2.58114	2.42152	1.04355	1.04355
mmu-miR-423-5p_st	UGAGGGGCAGAGAGCGAGACUUU	3.45743	6.86819	2.9312	1.17953	1.17953
mmu-miR-425_st	AAUGACACGAUCACUCCCGUUGA	2.13837	3.02866	2.2393	0.954925	-1.0472
mmu-miR-425-star_st	AUCGGGAAUGUCGUGUCCGCC	2.53207	2.35852	2.67934	0.945035	-1.05816
mmu-miR-429_st	UAAUACUGUCUGGUAAUGCCGU	2.5832	2.73805	2.89823	0.891304	-1.12195
mmu-miR-431_st	UGUCUUGCAGGCCGUCAUGCA	2.70146	3.69192	8.30621	0.325234	-3.07471
mmu-miR-431-star_st	CAGGUCGUCUUGCAGGGCUUCU	2.75051	2.9582	3.50137	0.785553	-1.27299
mmu-miR-432_st	UCUUGGAGUAGAUCAGUGGGCAG	2.93671	3.5881	2.18553	1.34371	1.34371
mmu-miR-433_st	AUCAUGAUGGGCUCCUCGGUGU	3.83504	10.5912	17.6217	0.217632	-4.59492
mmu-miR-433-star_st	UACGGUGAGCCUGUCAUUAUUC	2.28827	2.06765	1.70357	1.34323	1.34323
mmu-miR-434-3p_st	UUUGAACCAUCACUCGACUCCU	3.33579	3.12308	4.09865	0.813875	-1.22869
mmu-miR-434-5p_st	GCUCGACUCAUGGUUUGAACCA	2.30803	2.71475	3.45585	0.667861	-1.49732
mmu-miR-448_st	UUGCAUAUGUAGGAUGUCCCAU	2.04853	2.28827	2.19141	0.9348	-1.06975
mmu-miR-449a_st	UGGCAGUGUAUUGUUAGCUGGU	2.15687	2.55234	1.94291	1.11013	1.11013
mmu-miR-449b_st	AGGCAGUGUUGUUAGCUGGC	2.37792	3.40308	2.08489	1.14055	1.14055
mmu-miR-449c_st	AGGCAGUGCAUUGCUAGCUGG	1.84508	1.99901	2.16404	0.852609	-1.17287
mmu-miR-450a-3p_st	AUUGGGGAUGCUUUGCAUUCAU	2.40446	2.55469	2.43179	0.988758	-1.01137
mmu-miR-450a-5p_st	UUUUGCGAUGUGUUCCUAAUAU	2.9017	2.47524	2.25389	1.28742	1.28742
mmu-miR-450b-3p_st	AUUGGGAACAUUUUGCAUGCAU	3.78691	2.5671	2.61192	1.44986	1.44986
mmu-miR-450b-5p_st	UUUUGCAGUAUGUUCCUGAAUA	1.71107	2.37255	2.29748	0.744761	-1.34271
mmu-miR-451_st	AAACCGUUACCAUUACUGAGUU	2.8641	1.79293	2.44983	1.1691	1.1691
mmu-miR-452_st	UGUUUGCAGAGGAAACUGAGAC	2.29517	2.83475	2.61313	0.878321	-1.13854
mmu-miR-453_st	AGGUUGCCUCAUAGUGAGCUUGCA	3.7514	1.99092	1.505	2.49262	2.49262
mmu-miR-455_st	GCAGUCCACGGGCAUAUACAC	2.57785	2.58628	3.60645	0.714789	-1.39901
mmu-miR-455-star_st	UAUGUGCCUUUGGACUACAUCG	2.47711	2.06288	2.76481	0.895944	-1.11614
mmu-miR-463_st	UGAUAGACACCAUAUAAGGUAG	1.82136	2.1808	2.31182	0.787845	-1.26929
mmu-miR-463-star_st	UACCUAAUUUGUUGUCCAUCAU	2.24471	1.95902	1.99845	1.12323	1.12323
mmu-miR-464_st	UACCAAGUUUAUUCUGUGAGAUA	2.78591	2.14677	2.85193	0.976851	-1.0237
mmu-miR-465a-3p_st	GAUCAGGGCCUUUCUAAGUAGA	2.78591	1.78651	2.65518	1.04924	1.04924
mmu-miR-465a-5p_st	UAUUUAGAAUGGCACUGAUGUGA	1.93048	2.14677	2.35399	0.820087	-1.21938
mmu-miR-465b-3p_st	GAUCAGGGCCUUUCUAAGUAGA	1.78196	2.56434	2.1177	0.841461	-1.18841
mmu-miR-465b-5p_st	UAUUUAGAAUGGUGCUGAUCUG	2.49701	2.49701	2.45539	1.01695	1.01695
mmu-miR-465c-3p_st	GAUCAGGGCCUUUCUAAGUAGA	2.57785	2.50467	2.02508	1.27296	1.27296
mmu-miR-465c-5p_st	UAUUUAGAAUGGCGCUGAUCUG	2.68952	1.88504	2.9893	0.899715	-1.11146
mmu-miR-466a-3p_st	UAUACAUACACGCACACAUAAGA	2.18818	5.54413	3.09016	0.708112	-1.41221
mmu-miR-466a-5p_st	UAUGUGUGUGUACAUGUACAUA	2.60166	4.31371	2.89975	0.897199	-1.11458
mmu-miR-466b-3-3p_st	AAUACAUACACGCACACAUAAGA	1.9717	2.71759	2.48466	0.793549	-1.26016
mmu-miR-466b-3p_st	UAUACAUACACGCACACAUAAGA	2.32498	4.21736	2.2176	1.04842	1.04842
mmu-miR-466b-5p_st	GAUGUGUGUGUACAUGUACAUG	2.57785	3.54644	2.55181	1.01021	1.01021
mmu-miR-466c-3p_st	UAUACAUACACGCACACAUAAGA	2.28827	3.54644	2.95449	0.774507	-1.29114
mmu-miR-466c-5p_st	GAUGUGUGUGUGCAUGUACAUA	1.97901	4.0999	2.01912	0.980133	-1.02027
mmu-miR-466d-3p_st	UAUACAUACACGCACACAUAG	1.93694	3.84774	2.19264	0.883384	-1.13201
mmu-miR-466d-5p_st	UGUGUGUGCGUACAUGUACAUG	3.10331	3.06471	3.06471	1.0126	1.0126
mmu-miR-466e-3p_st	UAUACAUACACGCACACAUAAGA	2.80819	3.4331	3.09016	0.908753	-1.10041
mmu-miR-466e-5p_st	GAUGUGUGUGUACAUGUACAUA	2.23994	3.22426	1.80558	1.24057	1.24057
mmu-miR-466f_st	ACGUGUGUGUGCAUGUGCAUGU	2.3291	6.54902	2.78394	0.836617	-1.19529
mmu-miR-466f-3p_st	CAUACACACACACAUACACAC	4.81758	26.627	4.81758	1	1
mmu-miR-466f-5p_st	UACGUGUGUGUGCAUGUGCAUG	1.8572	7.35095	2.02696	0.916249	-1.09141
mmu-miR-466g_st	AUACAGACACAUGCACACACA	3.40707	11.425	2.82028	1.20806	1.20806
mmu-miR-466h_st	UGUGUGCAUGUGCUUGUGUGUA	1.90119	10.1759	2.56742	0.740506	-1.35043
mmu-miR-466i_st	AUACACACACACAUACACACUA	3.46311	16.1564	3.00162	1.15375	1.15375
mmu-miR-466j_st	UGUGUGCAUGUGCAUGUGUGUAA	2.17963	4.34917	3.85225	0.565806	-1.76739
mmu-miR-466k_st	UGUGUGUGUACAUGUACAUGUGA	2.13675	2.04019	1.77944	1.2008	1.2008
mmu-miR-466l_st	UAUAAAUACAUGCACACAUAUU	2.28827	2.17991	3.05675	0.748596	-1.33583
mmu-miR-467a_st	UAAGUGCCUGCAUGUAUAUGCG	3.11696	2.20838	2.38748	1.30554	1.30554
mmu-miR-467a-1-star_st	AUAUACAUACACACACCUACAC	3.80672	15.796	4.76244	0.799323	-1.25106
mmu-miR-467b_st	GUAAGUGCCUGCAUGUAUAUG	1.94583	2.46729	2.49727	0.779185	-1.28339
mmu-miR-467b-star_st	AUAUACAUACACACACCAACAC	4.22271	23.9118	3.90903	1.08025	1.08025
mmu-miR-467c_st	UAAGUGCGUGCAUGUAUAUGUG	2.49367	1.81956	2.14677	1.16159	1.16159
mmu-miR-467d_st	UAAGUGCGCGCAUGUAUAUGCG	1.82427	2.4795	1.71482	1.06383	1.06383
mmu-miR-467d-star_st	AUAUACAUACACACACCUACAC	3.04643	16.664	4.97308	0.612584	-1.63243
mmu-miR-467e_st	AUAAGUGUGAGCAUGUAUAUGU	2.92053	3.79003	2.85555	1.02275	1.02275
mmu-miR-467e-star_st	AUAUACAUACACACACCUAUAU	2.79842	6.61133	3.77907	0.740504	-1.35043
mmu-miR-467f_st	AUAUACACACACACACCUACA	4.5537	19.7069	2.83481	1.60635	1.60635
mmu-miR-467g_st	UAUACAUACACACACAUAUAU	3.45726	8.52961	2.50156	1.38204	1.38204
mmu-miR-467h_st	AUAAGUGUGUGCAUGUAUAUGU	2.37341	3.99878	2.08201	1.13996	1.13996
mmu-miR-468_st	UAUGACUGAUGUGCGUGUGUCUG	3.35816	3.78237	3.40063	0.987512	-1.01265
mmu-miR-469_st	UGCCUCUUUCAUUGAUCUUGGUGUCC	2.54296	2.14677	1.88222	1.35104	1.35104
mmu-miR-470_st	UUCUUGGACUGGCACUGGUGAGU	3.08973	3.08973	2.05718	1.50192	1.50192
mmu-miR-470-star_st	AACCAGUACCUUUCUGAGAAGA	1.9583	2.08739	2.39308	0.818318	-1.22202
mmu-miR-471_st	UACGUAGUAUAGUGCUUUUCAC	1.81213	1.92098	2.23553	0.810603	-1.23365
mmu-miR-483_st	AAGACGGGAGAAGAGAAGGGAG	2.70221	13.4391	2.93347	0.921164	-1.08558
mmu-miR-483-star_st	UCACUCCUCCCCUCCCGUCUU	3.75663	3.75663	3.75663	1	1
mmu-miR-484_st	UCAGGCUCAGUCCCCUCCCGAU	2.51628	1.84117	2.164	1.16279	1.16279
mmu-miR-485_st	AGAGGCUGGCCGUGAUGAAUUC	2.07112	1.96698	2.25543	0.918283	-1.08899
mmu-miR-485-star_st	AGUCAUACACGGCUCUCCUCUC	3.61221	2.16293	2.44049	1.48012	1.48012
mmu-miR-486_st	UCCUGUACUGAGCUGCCCCGAG	3.77001	2.27538	2.27864	1.65451	1.65451
mmu-miR-487b_st	AAUCGUACAGGGUCAUCCACUU	3.38942	5.53764	7.75093	0.437292	-2.2868
mmu-miR-488_st	UUGAAAGGCUGUUUCUUGGUC	1.90506	3.12932	2.53013	0.752949	-1.32811
mmu-miR-488-star_st	CCCAGAUAAUAGCACUCUCAA	2.25302	1.96698	1.87844	1.19941	1.19941
mmu-miR-489_st	AAUGACACCACAUAUAUGGCAGC	3.88388	2.21096	2.76012	1.40714	1.40714
mmu-miR-490_st	CAACCUGGAGGACUCCAUGCUG	1.84508	1.67434	1.88222	0.980268	-1.02013
mmu-miR-491_st	AGUGGGGAACCCUUCCAUGAGG	2.18643	2.52531	2.87428	0.76069	-1.3146
mmu-miR-493_st	UGAAGGUCCUACUGUGUGCCAGG	2.34275	2.89271	3.25616	0.719482	-1.38989
mmu-miR-494_st	UGAAACAUACACGGGAAACCUC	3.15478	3.87807	6.26693	0.503401	-1.98649
mmu-miR-495_st	AAACAAACAUGGUGCACUUCUU	2.21948	1.92224	2.17335	1.02122	1.02122
mmu-miR-496_st	UGAGUAUUACAUGGCCAAUCUC	2.00618	2.68209	2.30295	0.871136	-1.14793
mmu-miR-497_st	CAGCAGCACACUGUGGUUUGUA	2.46258	2.19422	2.25724	1.09097	1.09097
mmu-miR-499_st	UUAAGACUUGCAGUGAUGUUU	1.81225	2.3793	2.3793	0.761671	-1.3129
mmu-miR-500_st	AAUGCACCUGGGCAAGGGUUCA	2.5751	2.21353	2.64906	0.972082	-1.02872
mmu-miR-501-3p_st	AAUGCACCCGGGCAAGGAUUUG	2.17062	2.13939	1.88222	1.15322	1.15322
mmu-miR-501-5p_st	AAUCCUUUGUCCCUGGGUGAAA	2.19845	2.89172	2.96763	0.740812	-1.34987
mmu-miR-503_st	UAGCAGCGGGAACAGUACUGCAG	1.71556	2.82206	2.67723	0.640797	-1.56056
mmu-miR-503-star_st	GAGUAUUGUUUCCACUGCCUGG	3.54644	3.14398	2.35386	1.50665	1.50665
mmu-miR-504_st	AGACCCUGGUCUGCACUCUAUC	2.73149	2.78591	2.41088	1.13299	1.13299
mmu-miR-505_st	CGUCAACACUUGCUGGUUUUCU	2.59061	2.15641	2.06504	1.25451	1.25451
mmu-miR-509-3p_st	UGAUUGACAUUUCUGUAAUGG	1.96953	2.28531	1.71419	1.14896	1.14896
mmu-miR-509-5p_st	UACUCCAGAAUGUGGCAAUCAU	2.17437	2.36226	2.14677	1.01286	1.01286
mmu-miR-511_st	AUGCCUUUUGCUCUGCACUCA	2.34426	2.65518	2.17266	1.07898	1.07898
mmu-miR-532-3p_st	CCUCCCACACCCAAGGCUUGCA	2.8396	2.65916	3.3039	0.85947	-1.16351
mmu-miR-532-5p_st	CAUGCCUUGAGUGUAGGACCGU	3.24919	2.04917	2.94887	1.10184	1.10184
mmu-miR-539_st	GGAGAAAUUAUCCUUGGUGUGU	2.47902	3.57046	2.5528	0.971099	-1.02976
mmu-miR-540-3p_st	AGGUCAGAGGUCGAUCCUGG	2.07589	3.04829	2.34894	0.883756	-1.13153
mmu-miR-540-5p_st	CAAGGGUCACCCUCUGACUCUGU	3.44967	2.00037	2.23699	1.5421	1.5421
mmu-miR-541_st	AAGGGAUUCUGAUGUUGGUCACACU	3.26189	23.4376	46.29	0.0704664	-14.1912
mmu-miR-542-3p_st	UGUGACAGAUUGAUAACUGAAA	2.2511	1.97097	2.61056	0.862305	-1.15968
mmu-miR-542-5p_st	CUCGGGGAUCAUCAUGUCACGA	2.17641	1.88261	1.58479	1.37331	1.37331
mmu-miR-543_st	AAACAUUCGCGGUGCACUUCUU	2.96241	1.95313	10.7978	0.274352	-3.64495
mmu-miR-544_st	AUUCUGCAUUUUUAGCAAGCUC	2.47394	1.92985	1.91173	1.29408	1.29408
mmu-miR-546_st	AUGGUGGCACGGAGUC	2.57785	3.20897	2.45394	1.0505	1.0505
mmu-miR-547_st	CUUGGUACAUCUUUGAGUGAG	2.06894	1.74197	2.39187	0.864987	-1.15609
mmu-miR-551b_st	GCGACCCAUACUUGGUUUCAG	2.32603	3.3249	3.18164	0.731079	-1.36784
mmu-miR-568_st	AUGUAUAAAUGUAUACACAC	1.96684	2.14662	2.04796	0.96039	-1.04124
mmu-miR-574-3p_st	CACGCUCAUGCACACACCCACA	2.44713	15.5558	4.85792	0.50374	-1.98515
mmu-miR-574-5p_st	UGAGUGUGUGUGUGUGAGUGUGU	2.83235	17.6559	3.09504	0.915125	-1.09275
mmu-miR-582-3p_st	CCUGUUGAACAACUGAACCCAA	3.18188	3.29953	2.12124	1.50001	1.50001
mmu-miR-582-5p_st	UACAGUUGUUCAACCAGUUACU	3.49432	2.78591	2.65682	1.31523	1.31523
mmu-miR-590-3p_st	UAAUUUUAUGUAUAAGCUAGU	2.28827	1.70667	2.14386	1.06736	1.06736
mmu-miR-590-5p_st	GAGCUUAUUCAUAAAAGUGCAG	2.0023	1.96698	2.22097	0.901544	-1.10921
mmu-miR-592_st	AUUGUGUCAAUAUGCGAUGAUGU	2.61306	2.77702	4.0868	0.639391	-1.56399
mmu-miR-598_st	UACGUCAUCGUCGUCAUCGUUA	2.28827	1.96698	1.6169	1.41522	1.41522
mmu-miR-599_st	UUGUGUCAGUUUAUCAAAC	2.01766	1.91931	2.36616	0.852712	-1.17273
mmu-miR-615-3p_st	UCCGAGCCUGGGUCUCCCUCUU	2.11281	2.54263	3.14478	0.671845	-1.48844
mmu-miR-615-5p_st	GGGGGUCCCCGGUGCUCGGAUC	2.5175	2.25622	2.43469	1.03401	1.03401
mmu-miR-652_st	AAUGGCGCCACUAGGGUUGUG	2.54665	3.15572	4.57465	0.556688	-1.79634
mmu-miR-653_st	GUGUUGAAACAAUCUCUACUG	3.35028	1.99022	2.15445	1.55505	1.55505
mmu-miR-654-3p_st	UAUGUCUGCUGACCAUCACCUU	2.30389	2.60081	2.29956	1.00188	1.00188
mmu-miR-654-5p_st	UGGUAAGCUGCAGAACAUGUGU	2.02588	1.96775	1.8461	1.09739	1.09739
mmu-miR-664_st	UAUUCAUUUACUCCCCAGCCUA	3.2366	2.87304	3.30088	0.980528	-1.01986
mmu-miR-665_st	ACCAGGAGGCUGAGGUCCCU	1.92055	2.94774	3.66172	0.524494	-1.9066
mmu-miR-666-3p_st	GGCUGCAGCGUGAUCGCCUGCU	1.97554	1.97554	1.52338	1.29681	1.29681
mmu-miR-666-5p_st	AGCGGGCACAGCUGUGAGAGCC	2.3322	1.7621	1.87229	1.24564	1.24564
mmu-miR-667_st	UGACACCUGCCACCCAGCCCAAG	3.37625	5.23261	3.21269	1.05091	1.05091
mmu-miR-668_st	UGUCACUCGGCUCGGCCCACUACC	3.27115	2.22143	2.69505	1.21377	1.21377
mmu-miR-669a_st	AGUUGUGUGUGCAUGUUCAUGU	2.14677	8.30091	2.65518	0.808523	-1.23682
mmu-miR-669b_st	AGUUUUGUGUGCAUGUGCAUGU	2.28827	3.4895	2.62199	0.872726	-1.14584
mmu-miR-669c_st	AUAGUUGUGUGUGGAUGUGUGU	2.65172	13.9771	3.04177	0.87177	-1.14709
mmu-miR-669d_st	ACUUGUGUGUGCAUGUAUAUGU	3.63066	5.30323	2.03106	1.78757	1.78757
mmu-miR-669e_st	UGUCUUGUGUGUGCAUGUUCAU	2.89837	4.76244	1.95549	1.48217	1.48217
mmu-miR-669f_st	CAUAUACAUACACACACACGUAU	3.26018	6.97556	2.99337	1.08913	1.08913
mmu-miR-669g_st	UGCAUUGUAUGUGUUGACAUGAU	2.17154	2.14683	1.87373	1.15894	1.15894
mmu-miR-669h-3p_st	UAUGCAUAUACACACAUGCACA	2.73729	5.82097	3.08941	0.886025	-1.12864
mmu-miR-669h-5p_st	AUGCAUGGGUGUAUAGUUGAGUGC	2.60185	3.42172	2.14015	1.21574	1.21574
mmu-miR-669i_st	UGCAUAUACACACAUGCAUAC	2.70476	2.77356	2.48654	1.08776	1.08776
mmu-miR-669j_st	UGCAUAUACUCACAUGCAAACA	2.47689	3.019	2.8889	0.857382	-1.16634
mmu-miR-669k_st	UAUGCAUAUACACGCAUGCAA	1.8673	2.28303	1.88222	0.992071	-1.00799
mmu-miR-669l_st	AGUUGUGUGUGCAUGUAUAUGU	2.28735	6.07523	3.28187	0.696966	-1.43479
mmu-miR-669m_st	AUAUACAUCCACACAAACAUAU	3.14552	11.3314	3.98588	0.789166	-1.26716
mmu-miR-669n_st	AUUUGUGUGUGGAUGUGUGU	2.85892	11.6939	2.65518	1.07673	1.07673
mmu-miR-669o_st	UAGUUGUGUGUGCAUGUUUAUGU	2.33383	6.59037	2.5887	0.901544	-1.10921
mmu-miR-670_st	AUCCCUGAGUGUAUGUGGUGAA	2.67986	3.7385	2.23338	1.19991	1.19991
mmu-miR-671-3p_st	UCCGGUUCUCAGGGCUCCACC	3.39189	2.64704	2.92464	1.15976	1.15976
mmu-miR-671-5p_st	AGGAAGCCCUGGAGGGGCUGGAG	4.673	2.44064	2.33547	2.00089	2.00089
mmu-miR-672_st	UGAGGUUGGUGUACUGUGUGUGA	2.67671	15.047	9.87801	0.270977	-3.69036
mmu-miR-673-3p_st	UCCGGGGCUGAGUUCUGUGCACC	2.78591	1.92608	2.17688	1.27977	1.27977
mmu-miR-673-5p_st	CUCACAGCUCUGGUCCUUGGAG	2.78591	1.99065	2.46208	1.13153	1.13153
mmu-miR-674_st	GCACUGAGAUGGGAGUGGUGUA	2.2104	8.13127	3.16198	0.699056	-1.4305
mmu-miR-674-star_st	CACAGCUCCCAUCUCAGAACAA	2.35989	5.20291	3.21478	0.734075	-1.36226
mmu-miR-675-3p_st	CUGUAUGCCCUAACCGCUCAGU	2.52967	1.90665	1.88222	1.34398	1.34398
mmu-miR-675-5p_st	UGGUGCGGAAAGGGCCCACAGU	1.91241	2.51403	2.10823	0.907118	-1.10239
mmu-miR-676_st	CCGUCCUGAGGUUGUUGAGCU	2.32334	2.01221	2.35399	0.986978	-1.01319
mmu-miR-676-star_st	ACUCUACAACCUUAGGACUUGC	2.46374	3.30935	3.31153	0.743987	-1.34411
mmu-miR-677_st	UUCAGUGAUGAUUAGCUUCUGA	2.14539	2.2394	2.06763	1.03761	1.03761
mmu-miR-678_st	GUCUCGGUGCAAGGACUGGAGG	2.96654	3.20346	2.63499	1.12582	1.12582
mmu-miR-679_st	GGACUGUGAGGUGACUCUUGGU	2.35455	3.06862	3.17833	0.740812	-1.34987
mmu-miR-680_st	GGGCAUCUGCUGACAUGGGGG	1.79315	2.26572	1.98652	0.902661	-1.10784
mmu-miR-681_st	CAGCCUCGCUGGCAGGCAGCU	2.3246	1.8974	1.93979	1.19837	1.19837
mmu-miR-682_st	CUGCAGUCACAGUGAAGUCUG	1.79292	2.32672	2.01015	0.891937	-1.12116
mmu-miR-683_st	CCUGCUGUAAGCUGUGUCCUC	2.45217	1.92615	1.96492	1.24797	1.24797
mmu-miR-684_st	AGUUUUCCCUUCAAGUCAA	2.5753	2.4649	2.51209	1.02516	1.02516
mmu-miR-686_st	AUUGCUUCCCAGACGGUGAAGA	2.68232	3.08032	2.38447	1.12491	1.12491
mmu-miR-687_st	CUAUCCUGGAAUGCAGCAAUGA	1.75209	2.16052	1.76811	0.990942	-1.00914
mmu-miR-688_st	UCGCAGGCGACUACUUAUUC	2.55338	2.1264	2.60434	0.980432	-1.01996
mmu-miR-689_st	CGUCCCCGCUCGGCGGGGUCC	2.29623	1.84508	2.35399	0.975464	-1.02515
mmu-miR-690_st	AAAGGCUAGGCUCACAACCAAA	47.669	20.9763	32.1715	1.48172	1.48172
mmu-miR-691_st	AUUCCUGAAGAGAGGCAGAAAA	2.28827	2.12201	1.95925	1.16794	1.16794
mmu-miR-692_st	AUCUCUUUGAGCGCCUCACUC	2.43679	2.43679	2.48909	0.978986	-1.02147
mmu-miR-693-3p_st	GCAGCUUUCAGAUGUGGCUGUAA	2.0419	1.95873	1.99284	1.02462	1.02462
mmu-miR-693-5p_st	CAGCCACAUCCGAAAGUUUUC	2.28006	3.33053	2.44447	0.932742	-1.07211
mmu-miR-694_st	CUGAAAAUGUUGCCUGAAG	1.98709	2.87759	2.19654	0.904645	-1.10541
mmu-miR-695_st	AGAUUGGGCAUAGGUGACUGAA	3.01986	3.52768	4.0999	0.736568	-1.35765
mmu-miR-696_st	GCGUGUGCUUGCUGUGGG	2.22867	8.25289	1.561	1.42772	1.42772
mmu-miR-697_st	AACAUCCUGGUCCUGUGGAGA	3.21592	3.11612	2.65518	1.21119	1.21119
mmu-miR-698_st	CAUUCUCGUUUCCUUCCCU	2.21559	7.01747	2.27753	0.972803	-1.02796
mmu-miR-700_st	CACGCGGGAACCGAGUCCACC	2.16718	2.16718	2.47408	0.875956	-1.14161
mmu-miR-701_st	UUAGCCGCUGAAAUAGAUGGA	2.10299	1.97519	2.37451	0.885651	-1.12911
mmu-miR-702_st	UGCCCACCCUUUACCCCGCUC	3.18188	2.36782	2.65518	1.19837	1.19837
mmu-miR-703_st	AAAACCUUCAGAAGGAAAGAA	2.95449	3.53137	2.95449	1	1
mmu-miR-704_st	AGACAUGUGCUCUGCUCCUAG	2.64389	2.59057	3.31	0.798758	-1.25194
mmu-miR-705_st	GGUGGGAGGUGGGGUGGGCA	3.67578	37.4616	3.03158	1.2125	1.2125
mmu-miR-706_st	AGAGAAACCCUGUCUCAAAAAA	10.544	4.13604	2.50234	4.21365	4.21365
mmu-miR-707_st	CAGUCAUGCCGCUUGCCUACG	2.26636	2.28827	2.48514	0.911965	-1.09653
mmu-miR-708_st	AAGGAGCUUACAAUCUAGCUGGG	2.58143	1.9995	2.45117	1.05314	1.05314
mmu-miR-708-star_st	CAACUAGACUGUGAGCUUCUAG	1.67443	2.24856	2.15445	0.777194	-1.28668
mmu-miR-709_st	GGAGGCAGAGGCAGGAGGA	151.653	871.019	446.356	0.339758	-2.94327
mmu-miR-710_st	CCAAGUCUUGGGGAGAGUUGAG	1.95602	2.95343	2.27584	0.859472	-1.1635
mmu-miR-711_st	GGGACCCGGGGAGAGAUGUAAG	1.86329	2.1962	2.14677	0.867947	-1.15214
mmu-miR-712_st	CUCCUUCACCCGGGCGGUACC	2.29355	2.47868	2.49488	0.919302	-1.08778
mmu-miR-712-star_st	UGCGAGUCACCCCCGGGUGUUG	3.27374	2.64118	3.56524	0.918238	-1.08904
mmu-miR-713_st	UGCACUGAAGGCACACAGC	2.76636	1.96698	2.2999	1.20282	1.20282
mmu-miR-714_st	CGACGAGGGCCGGUCGGUCGC	2.31064	2.30318	2.37993	0.970883	-1.02999
mmu-miR-715_st	CUCCGUGCACACCCCCGCGUG	2.30815	2.47686	3.32868	0.693415	-1.44214
mmu-miR-717_st	CUCAGACAGAGAUACCUUCUCU	2.47983	2.16923	2.65518	0.933958	-1.07071
mmu-miR-718_st	CUUCCGCCCGGCCGGGUGUCG	2.78477	2.13267	2.48675	1.11985	1.11985
mmu-miR-719_st	AUCUCGGCUACAGAAAAAUGUU	2.57785	2.30692	2.10351	1.2255	1.2255
mmu-miR-720_st	AUCUCGCUGGGGCCUCCA	1.62296	2.39904	1.73531	0.935257	-1.06923
mmu-miR-721_st	CAGUGCAAUUAAAAGGGGGAA	2.23307	2.62989	2.00337	1.11466	1.11466
mmu-miR-741_st	UGAGAGAUGCCAUUCUAUGUAGA	1.96714	2.32758	2.28878	0.85947	-1.16351
mmu-miR-742_st	GAAAGCCACCAUGCUGGGUAAA	2.54328	2.44742	2.11798	1.2008	1.2008
mmu-miR-742-star_st	UACUCACAUGGUUGCUAAUCA	2.21906	2.0406	1.91035	1.1616	1.1616
mmu-miR-743a_st	GAAAGACACCAAGCUGAGUAGA	2.44915	1.674	2.21456	1.10593	1.10593
mmu-miR-743b-3p_st	GAAAGACAUCAUGCUGAAUAGA	2.93628	2.64504	2.99312	0.98101	-1.01936
mmu-miR-743b-5p_st	UGUUCAGACUGGUGUCCAUCA	2.20384	2.40529	1.89339	1.16397	1.16397
mmu-miR-744_st	UGCGGGGCUAGGGCUAACAGCA	2.90553	3.68417	3.35897	0.865005	-1.15606
mmu-miR-744-star_st	CUGUUGCCACUAACCUCAACCU	5.19913	3.09016	2.35399	2.20864	2.20864
mmu-miR-758_st	UUUGUGACCUGGUCCACUA	2.40631	1.90719	2.25749	1.06592	1.06592
mmu-miR-759_st	GCAGAGUGCAAACAAUUUUGAC	2.80825	2.37609	2.10658	1.33309	1.33309
mmu-miR-760_st	CGGCUCUGGGUCUGUGGGGA	4.04657	11.2189	3.55897	1.13701	1.13701
mmu-miR-761_st	GCAGCAGGGUGAAACUGACACA	3.40841	2.08422	1.90045	1.79347	1.79347
mmu-miR-762_st	GGGGCUGGGGCCGGGACAGAGC	4.61349	10.0821	4.0999	1.12527	1.12527
mmu-miR-763_st	CCAGCUGGGAAGAACCAGUGGC	1.84508	1.88434	2.0121	0.916995	-1.09052
mmu-miR-764-3p_st	AGGAGGCCAUAGUGGCAACUGU	1.8534	2.14677	1.91342	0.96863	-1.03239
mmu-miR-764-5p_st	GGUGCUCACAUGUCCUCCU	2.10098	2.56067	1.96588	1.06872	1.06872
mmu-miR-767_st	UGCACCAUGGUUGUCUGAGCA	2.28827	2.0309	1.96174	1.16645	1.16645
mmu-miR-770-3p_st	CGUGGGCCUGACGUGGAGCUGG	2.00412	2.82148	2.88404	0.694901	-1.43905
mmu-miR-770-5p_st	AGCACCACGUGUCUGGGCCACG	2.11763	2.27778	2.14677	0.986424	-1.01376
mmu-miR-7a_st	UGGAAGACUAGUGAUUUUGUUGU	2.36513	2.79686	4.0999	0.576875	-1.73348
mmu-miR-7a-star_st	CAACAAAUCACAGUCUGCCAUA	2.59185	3.19297	2.73866	0.946392	-1.05664
mmu-miR-7b_st	UGGAAGACUUGUGAUUUUGUUGU	3.0443	3.31503	2.113	1.44075	1.44075
mmu-miR-802_st	UCAGUAACAAAGAUUCAUCCUU	2.73057	2.18035	2.45107	1.11403	1.11403
mmu-miR-804_st	UGUGAGUUGUUCCUCACCUGGA	2.28827	2.55847	2.14677	1.06591	1.06591
mmu-miR-871_st	UAUUCAGAUUAGUGCCAGUCAUG	3.3254	2.10302	3.15955	1.05249	1.05249
mmu-miR-872_st	AAGGUUACUUGUUAGUUCAGG	2.23868	1.8697	1.8697	1.19735	1.19735
mmu-miR-872-star_st	UGAACUAUUGCAGUAGCCUCCU	2.18534	2.46135	1.87314	1.16668	1.16668
mmu-miR-873_st	GCAGGAACUUGUGAGUCUCCU	1.78857	2.22146	1.96948	0.90814	-1.10115
mmu-miR-874_st	CUGCCCUGGCCCGAGGGACCGA	2.35991	2.09334	2.68401	0.879247	-1.13734
mmu-miR-875-3p_st	CCUGAAAAUACUGAGGCUAUG	2.13655	3.28374	2.33183	0.916254	-1.0914
mmu-miR-875-5p_st	UAUACCUCAGUUUUAUCAGGUG	2.15855	2.14677	3.25523	0.663101	-1.50807
mmu-miR-876-3p_st	UAGUGGUUUACAAAGUAAUUCA	2.57864	2.30355	2.68092	0.961847	-1.03967
mmu-miR-876-5p_st	UGGAUUUCUCUGUGAAUCACUA	2.3321	2.69271	1.8569	1.25591	1.25591
mmu-miR-877_st	GUAGAGGAGAUGGCGCAGGG	10.9216	8.37442	10.631	1.02733	1.02733
mmu-miR-877-star_st	UGUCCUCUUCUCCCUCCUCCCA	3.63438	5.32156	3.10988	1.16866	1.16866
mmu-miR-878-3p_st	GCAUGACACCACACUGGGUAGA	2.31665	2.04313	2.28148	1.01542	1.01542
mmu-miR-878-5p_st	UAUCUAGUUGGAUGUCAAGACA	3.05934	1.53912	3.39867	0.900158	-1.11092
mmu-miR-879_st	AGAGGCUUAUAGCUCUAAGCC	2.47849	2.47204	2.52839	0.980262	-1.02013
mmu-miR-879-star_st	GCUUAUGGCUUCAAGCUUUCGG	1.69124	1.97083	2.60725	0.648667	-1.54162
mmu-miR-880_st	UACUCCAUCCUCUCUGAGUAGA	2.23944	1.96698	2.27318	0.98516	-1.01506
mmu-miR-881_st	AACUGUGUCUUUUCUGAAUAGA	2.14677	2.28827	3.18373	0.674294	-1.48303
mmu-miR-881-star_st	CAGAGAGAUAACAGUCACAUCU	2.37186	2.37186	2.14677	1.10485	1.10485
mmu-miR-882_st	AGGAGAGAGUUAGCGCAUUAGU	2.95453	1.90467	2.57211	1.14868	1.14868
mmu-miR-883a-3p_st	UAACUGCAACAGCUCUCAGUAU	1.87993	2.35241	2.35399	0.798612	-1.25217
mmu-miR-883a-5p_st	UGCUGAGAGAAGUAGCAGUUAC	2.25283	2.17208	2.15577	1.04503	1.04503
mmu-miR-883b-3p_st	UAACUGCAACAUCUCUCAGUAU	2.27644	1.97158	1.98067	1.14933	1.14933
mmu-miR-883b-5p_st	UACUGAGAAUGGGUAGCAGUCA	2.57785	2.28827	2.63563	0.978077	-1.02241
mmu-miR-9_st	UCUUUGGUUAUCUAGCUGUAUGA	2.20088	2.10069	2.35399	0.934956	-1.06957
mmu-miR-9-star_st	AUAAAGCUAGAUAACCGAAAGU	2.51982	2.46135	3.9837	0.632532	-1.58095
mmu-miR-92a_st	UAUUGCACUUGUCCCGGCCUG	5.60677	4.26336	6.67918	0.839441	-1.19127
mmu-miR-92a-star_st	AGGUGGGGAUUGGUGGCAUUAC	2.70249	6.834	2.50319	1.07962	1.07962
mmu-miR-92b_st	UAUUGCACUCGUCCCGGCCUCC	3.16955	5.06559	4.13853	0.765864	-1.30571
mmu-miR-93_st	CAAAGUGCUGUUCGUGCAGGUAG	3.08729	14.5279	12.9375	0.23863	-4.19058
mmu-miR-93-star_st	ACUGCUGAGCUAGCACUUCCCG	2.33976	2.01123	4.43059	0.528092	-1.89361
mmu-miR-96_st	UUUGGCACUAGCACAUUUUUGCU	2.28827	1.6086	2.42714	0.942785	-1.06069
mmu-miR-98_st	UGAGGUAGUAAGUUGUAUUGUU	2.53213	2.66582	2.35399	1.07567	1.07567
mmu-miR-99a_st	AACCCGUAGAUCCGAUCUUGUG	2.37155	3.71389	7.41615	0.319782	-3.12713
mmu-miR-99b_st	CACCCGUAGAACCGACCUUGCG	3.06569	28.6869	15.6458	0.195944	-5.10351
mmu-miR-99b-star_st	CAAGCUCGUGUCUGUGGGUCCG	2.30651	4.15322	2.97774	0.774582	-1.29102
v11_mmu-miR-197_st	TTCACCACCTTCTCCACCCAGC	3.71021	12.9947	2.42817	1.52798	1.52798
v11_mmu-miR-467a-str_st	ATATACATACACACACCTACAC	8.62509	8.84701	3.09016	2.79115	2.79115
v11_mmu-miR-685_st	TCAATGGCTGAGGTGAGGCAC	2.56865	3.44941	2.27286	1.13014	1.13014
v11_mmu-miR-699_st	AGGCAGTGCGACCTGGCTCG	2.3408	2.49523	2.37812	0.984307	-1.01594
v11_mmu-miR-805_st	GAATTGATCAGGACATAGGG	1.86265	2.05248	3.30532	0.563531	-1.77452
